# Supplementary material
Source: publisher figshare collection journal article supplement (https://acs.figshare.com/ndownloader/files/3893644)

## *Supporting Information*

# **Room-Temperature Direct Alkynylation of Arenes with Copper Acetylides**

Cédric Theunissen and Gwilherm Evano\*

*Laboratoire de Chimie Organique, Service de Chimie et PhysicoChimie Organiques, Université Libre de Bruxelles, Avenue F. D. Roosevelt 50, CP160/06, 1050 Brussels, Belgium*

|                                                                                     |            |
|-------------------------------------------------------------------------------------|------------|
| <i>General Information.....</i>                                                     | <i>S2</i>  |
| <i>Experimental Procedures and Characterization Data:</i>                           |            |
| <i>Unreported Starting Materials.....</i>                                           | <i>S3</i>  |
| <i>Experimental Procedures and Characterization Data:</i>                           |            |
| <i>Unreported Alkynylcopper Reagents .....</i>                                      | <i>S6</i>  |
| <i>Experimental Procedures and Characterization Data:</i>                           |            |
| <i>Alkynylation of Azoles and Polyhalogenated Arenes.....</i>                       | <i>S10</i> |
| <i>Experimental Procedures and Characterization Data:</i>                           |            |
| <i>Alkynylation of Complex Substrates and Consecutive Double Alkynylation .....</i> | <i>S26</i> |
| <i><sup>1</sup>H and <sup>13</sup>C NMR Spectra.....</i>                            | <i>S30</i> |

## General Information.

All reactions were carried out in oven-dried glassware under an argon atmosphere employing standard techniques in handling air-sensitive materials unless otherwise stated.

All reagents and solvents were reagent grade. Acetonitrile and *N,N*-dimethylformamide were freshly distilled from calcium hydride under argon. All reagents were used as supplied.

Reactions were magnetically stirred and monitored by thin layer chromatography using Merck-Kieselgel 60F<sub>254</sub> plates. Flash chromatography was performed with silica gel 60 (particle size 35-70  $\mu$ m) supplied by Merck. Yields refer to chromatographically and spectroscopically pure compounds.

Proton NMR spectra were recorded using an internal deuterium lock at ambient temperature on Bruker 300 and 400 MHz spectrometers. Internal reference of  $\delta_H$  7.26 was used for CDCl<sub>3</sub>. Data are presented as follows: chemical shift (in ppm on the  $\delta$  scale relative to  $\delta_{TMS}$  = 0), multiplicity (s = singlet, d = doublet, t = triplet, q = quartet, quint. = quintuplet, non. = nonuplet, m = multiplet, br. = broad, app. = apparent), coupling constant (J/Hz) and integration. Resonances that are either partially or fully obscured are denoted obscured (obs.). Carbon-13 NMR spectra were recorded at 75 MHz using CDCl<sub>3</sub> ( $\delta_C$  77.16) as internal reference. Fluorine-19 NMR spectra were recorded at 376 MHz using CF<sub>3</sub>CH<sub>2</sub>OH ( $\delta_F$  -77.59) as internal reference.

Optical rotations were recorded on an Atago AP-100 automatic polarimeter at 589 nm and reported as follows:  $[\alpha]_D^{25}$ , concentration (*c* in g/100 mL), and solvent. Melting points were recorded on a Stuart Scientific Analogue SMP11. Infrared spectra were recorded on a Bruker Alpha Spectrometer (ATR). High-resolution mass-spectra were obtained on Waters Qtof Micro, Waters QToF API US or Thermo Finnigan MAT 95XP spectrometers.

## Experimental Procedures and Characterization Data:

### Unreported Starting Materials

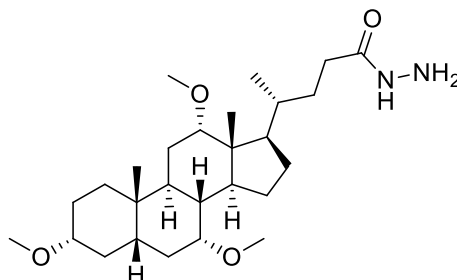

**(R)-4-[(3R,5S,7R,8R,9S,10S,12S,13R,14S,17R)-3,7,12-Trimethoxy-10,13-dimethylhexadeca-hydro-1H-cyclopenta[a]phenanthren-17-yl]pentanehydrazide.** To a solution of (R)-methyl-4-[(3R,5S,7R,8R,9S,10S,12S,13R,14S,17R)-3,7,12-trimethoxy-10,13-dimethylhexadeca-hydro-1H-cyclopenta[a]phenanthren-17-yl]pentanoate<sup>S1</sup> (4.8 g, 10.3 mmol) in methanol (25 mL) was added hydrazine hydrate (10 mL, 206 mmol). The resulting reaction mixture was vigorously stirred at reflux overnight, cooled back to room temperature and concentrated under vacuum. The crude residue was taken up with water (50 mL) and EtOAc (50 mL). The organic layer was separated and the aqueous layer was extracted with EtOAc. Combined organic layers were washed with brine, dried over MgSO<sub>4</sub>, filtered and concentrated under vacuum to afford the desired hydrazide as a white solid (4.8 g, 10.3 mmol, quant.) which was used in the next step without further purification. Mp: 77 °C;  $[\alpha]_D^{25} + 45$  (*c* 1.0, CHCl<sub>3</sub>); <sup>1</sup>H NMR (300 MHz, CDCl<sub>3</sub>):  $\delta$  6.76 (s, 1H), 3.88 (s, 2H), 3.36-3.30 (obs. m, 1H), 3.32 (s, 3H), 3.24 (s, 3H), 3.20 (s, 3H), 3.13 (app. d, *J* = 4.2 Hz, 1H), 3.05-2.92 (m, 1H), 2.28-1.58 (m, 14H), 1.58-1.11 (m, 9H), 1.09-0.94 (m, 1H), 0.91 (d, *J* = 6.3 Hz, 3H), 0.89 (s, 3H), 0.64 (s, 3H); <sup>13</sup>C NMR (75 MHz, CDCl<sub>3</sub>):  $\delta$  174.7, 82.1, 80.1, 77.1, 56.0, 55.8, 55.5, 46.2, 42.8, 42.1, 39.7, 35.4, 35.2, 35.0, 34.6, 31.6, 31.2, 28.1, 27.9, 27.5, 26.9, 23.3, 23.0, 22.1, 17.6, 12.6; IR (ATR):  $\nu_{\max}$  3443, 2931, 2869, 1652, 1519, 1454, 1370, 1192, 1100, 753 cm<sup>-1</sup>; ESIHRMS *m/z* calcd for C<sub>27</sub>H<sub>49</sub>N<sub>2</sub>O<sub>4</sub> [M+H]<sup>+</sup> 465.6392, found 465.3689.

<sup>S1</sup> Rueda-Becerril, M.; Chatalova Sazepin, C.; Leung, J. C. T.; Okbinoglu, T.; Kennepohl, P.; Paquin, J.-F.; Sammis, G. M. *J. Am. Chem. Soc.* **2012**, *134*, 4026.

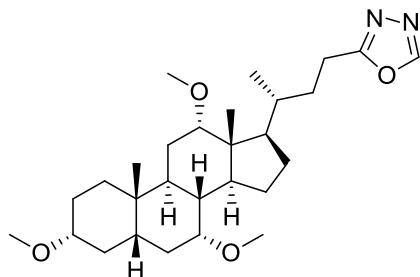

**2-((*R*)-3-[(3*R*,5*S*,7*R*,8*R*,9*S*,10*S*,12*S*,13*R*,14*S*,17*R*)-3,7,12-Trimethoxy-10,13-dimethyl-hexadecahydro-1*H*-cyclopenta[*a*]phenanthren-17-yl]butyl)-1,3,4-oxadiazole.** To a solution of (*R*)-4-[(3*R*,5*S*,7*R*,8*R*,9*S*,10*S*,12*S*,13*R*,14*S*,17*R*)-3,7,12-trimethoxy-10,13-dimethylhexadecahydro-1*H*-cyclopenta[*a*]phenanthren-17-yl]pentanehydrazide (2.5 g, 5.4 mmol) in triethyl orthoformate (20 mL) was added *p*-toluenesulfonic acid monohydrate (51 mg, 0.3 mmol). The resulting reaction mixture was vigorously stirred at reflux for 24 hours, cooled back to room temperature and concentrated under vacuum. The crude residue was finally purified by flash column chromatography over silica gel (cyclohexane/EtOAc: 70/30) to afford the desired 1,3,4-oxadiazole as a white solid (2.3 g, 4.8 mmol, 88%). Mp: 152 °C;  $[\alpha]_D^{25} + 45$  (c 1.0, CHCl<sub>3</sub>); <sup>1</sup>H NMR (300 MHz, CDCl<sub>3</sub>):  $\delta$  8.31 (s, 1H), 3.33 (app. d, *J* = 11.2 Hz, 1H), 3.31 (s, 3H), 3.25 (s, 3H), 3.19 (s, 3H), 3.12 (app. d, *J* = 2.5 Hz, 1H), 3.05–2.74 (m, 3H), 2.26–1.38 (m, 16H), 1.37–1.10 (m, 4H), 1.09–0.83 (obs. m, 2H), 0.97 (d, *J* = 6.4 Hz, 3H), 0.88 (s, 3H), 0.64 (s, 3H); <sup>13</sup>C NMR (75 MHz, CDCl<sub>3</sub>):  $\delta$  167.8, 152.9, 82.0, 80.8, 77.0, 56.0, 55.8, 55.5, 46.3, 46.2, 42.8, 42.1, 39.7, 35.4, 35.2, 35.0, 34.5, 32.6, 28.1, 27.9, 27.5, 26.9, 23.2, 23.0, 22.1 (2C), 17.4, 12.6; IR (ATR):  $\nu_{\max}$  2939, 1574, 1519, 1471, 1453, 1372, 1100, 956, 643 cm<sup>-1</sup>; ESIHRMS *m/z* calcd for C<sub>28</sub>H<sub>47</sub>N<sub>2</sub>O<sub>4</sub> [M+H]<sup>+</sup> 475.3536, found 475.3540.

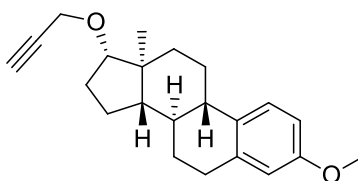

**O<sub>3</sub>-Methyl-O<sub>17</sub>-propargyl-estradiol.** To a solution of O<sub>3</sub>-methyl-estradiol (2.1 g, 7.5 mmol) in *N,N*-dimethylformamide (30 mL) was added sodium hydride (60% dispersion in mineral oil, 1.5 g, 38

mmol) portionwise over 15 min. The mixture was allowed to stir for 15 min at rt and propargyl bromide (80% solution in toluene, 4.2 mL, 38 mmol) was added dropwise at rt. The resulting reaction mixture was vigorously stirred at rt overnight, diluted with water (50 mL) and extracted with diethyl ether. Combined organic layers were washed with brine, dried over  $\text{MgSO}_4$ , filtered and concentrated under vacuum. The crude residue was finally purified by flash column chromatography over silica gel (cyclohexane/ $\text{CH}_2\text{Cl}_2$ : 80/20 then 60/40) to afford the desired terminal alkyne as an orange solid (958 mg, 3.0 mmol, 39%). Mp: 119 °C;  $^1\text{H}$  NMR (300 MHz,  $\text{CDCl}_3$ ):  $\delta$  7.21 (d,  $J$  = 8.6 Hz, 1H), 6.72 (d,  $J$  = 8.5 Hz, 1H), 6.64 (s, 1H), 4.20 (s, 2H), 3.78 (s, 3H), 3.64 (t,  $J$  = 8.3 Hz, 1H), 2.92-2.78 (m, 2H), 2.42 (t,  $J$  = 1.9 Hz, 1H), 2.36-1.98 (m, 4H), 1.94-1.81 (m, 1H), 1.78-1.15 (m, 8H), 0.81 (s, 3H);  $^{13}\text{C}$  NMR (75 MHz,  $\text{CDCl}_3$ ):  $\delta$  157.6, 138.1, 132.7, 126.4, 113.9, 111.6, 88.3, 80.7, 73.9, 57.3, 55.3, 50.3, 44.0, 43.3, 38.7, 37.8, 29.9, 27.8, 27.3, 26.5, 23.2, 11.8; IR (ATR):  $\nu_{\text{max}}$  3249, 2909, 2864, 2127, 1495, 1447, 1280, 1255, 1133, 1086, 1037, 868, 739, 692  $\text{cm}^{-1}$ ; EIHRMS  $m/z$  calcd for  $\text{C}_{22}\text{H}_{28}\text{O}_2$   $[\text{M}]^+$  324.2089, found 324.2088.

## Experimental Procedures and Characterization Data:

### Unreported Alkynylcopper Reagents

Alkynylcopper reagents were prepared according to our previously reported procedures recalled below.<sup>S2</sup>

- **Method A using copper iodide in aqueous ammonia and ethanol.** To a solution of copper iodide (3.8 g, 20.0 mmol) in a mixture of aqueous ammonium hydroxide (28% NH<sub>3</sub> solution, 50 mL) and ethanol (30 mL) was added the alkyne (10.0 mmol, neat if the alkyne is a liquid, dissolved in 5 mL of ethanol if the alkyne is a solid) dropwise. The deep blue reaction mixture was stirred overnight at room temperature under argon and the yellow precipitate was collected by filtration and successively washed with ammonium hydroxide (10% NH<sub>3</sub> aqueous solution, 3x50 mL), water (3x50 mL), ethanol (3x50 mL), and diethyl ether (3x50 mL). The bright yellow solid was then dried under high vacuum overnight to afford the desired polymeric alkynylcopper reagent which was used without further purification.
- **Method B using copper iodide and potassium carbonate in DMF.** To a suspension of copper iodide (762 mg, 4.0 mmol) in DMF (15 mL) was added a solution of the alkyne (4.0 mmol) in DMF (5 mL) *via* cannula and under argon. Finely powdered potassium carbonate (1.1 g, 8.0 mmol) was then added at rt and the resulting slurry was stirred under argon for 2 hours, slowly turning into a bright yellow and thick suspension of the copper acetylide which was then collected by filtration and successively washed with ammonium hydroxide (10 % NH<sub>3</sub> aqueous solution, 2x10 mL), water (2x10 mL), absolute ethanol (2x10 mL) and diethyl ether (2x10 mL). The bright yellow solid was then dried under high vacuum overnight to afford the desired polymeric alkynylcopper reagent.

---

<sup>S2</sup> (a) Jouvin, K.; Heimbürger, J.; Evano, G. *Chem. Sci.* **2012**, 3, 756. (b) Jouvin, K.; Veillard, R.; Theunissen, C.; Alayrac, C.; Gaumont, A.-C.; Evano, G. *Org. Lett.* **2013**, 15, 4592.

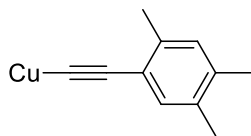

**[(2,4,5-Trimethylphenyl)ethynyl]copper.** This compound was obtained according to method B; Yield: 68% (1.5 g, 7.1 mmol).

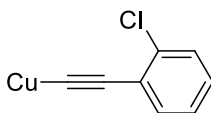

**[(2-Chlorophenyl)ethynyl]copper.** This compound was obtained according to method A; Yield: 75% (1.2 g, 5.9 mmol).

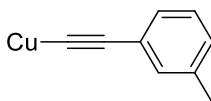

**[(3-Methylphenyl)ethynyl]copper.** This compound was obtained according to method A; Yield: 86% (770 mg, 4.3 mmol).

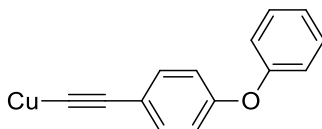

**[(4-Phenoxyphenyl)ethynyl]copper.** This compound was obtained according to method A; Yield: 73% (1.8 g, 7.1 mmol).

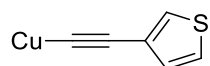

**(Thiophen-3-ylethynyl)copper.** This compound was obtained according to method A; Yield: 96% (718 mg, 4.2 mmol).

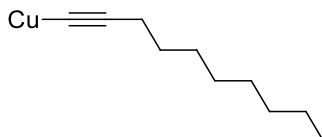

**Dec-1-yn-1-ylcopper.** This compound was obtained according to method A; Yield: 72% (2.9 g, 14.4 mmol).

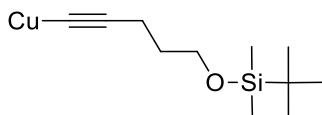

**{5-[(*tert*-Butyldimethylsilyl)oxy]pent-1-yn-1-yl}copper.** This compound was obtained according to method A; Yield: 68% (1.9 g, 7.3 mmol).

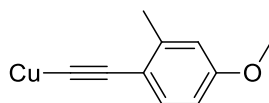

**[(4-Methoxy-2-methylphenyl)ethynyl]copper.** This compound was obtained according to method A; Yield: 73% (1.6 g, 7.5 mmol).

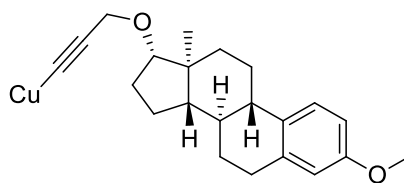

**[(*O*<sub>3</sub>-Methyl-estradiol-*O*<sub>17</sub>-yl)prop-1-yn-1-yl]copper.** This compound was obtained according to method B; Yield: 58% (448 mg, 1.2 mmol).

## Experimental Procedure and Characterization Data:

### Alkynylation of Azoles and Polyhalogenated Arenes

#### General procedure:

In a 5 mL round bottom flask, the arene (4.0 mmol) was dissolved in acetonitrile (4 mL). 1,10-Phenanthroline (901 mg, 5.0 mmol), lithium *tert*-butoxide (80 mg, 1.0 mmol) and the alkynylcopper reagent (1.0 mmol) were next successively added and the resulting brownish slurry was vigorously stirred at room temperature under an oxygen atmosphere (balloon) for 48 hours. The reaction mixture was then diluted with EtOAc, filtered over a short plug of silica gel (washed with EtOAc) and concentrated under vacuum. The crude residue was finally purified by flash column chromatography over silica gel to afford the desired alkynylated arene.

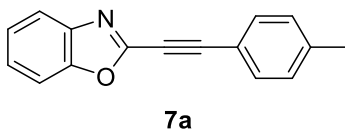

**2-[(4-Methylphenyl)ethynyl]benzoxazole 7a.** Yield: 54% (126 mg, 540  $\mu$ mol). Solvent system for flash column chromatography: cyclohexane/EtOAc: 90/10; White solid. This compound has been previously reported.<sup>S3</sup>

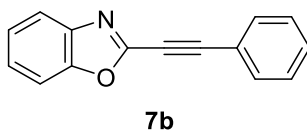

**2-(Phenylethynyl)benzoxazole 7b.** Yield: 43% (95 mg, 433  $\mu$ mol). Solvent system for flash column chromatography: cyclohexane/EtOAc: 95/5; Pale yellow solid. This compound has been previously reported.<sup>S3</sup>

---

<sup>S3</sup> Matsuyama, N.; Hirano, K.; Satoh, T.; Miura, M. *Org. Lett.* **2009**, *11*, 4156.

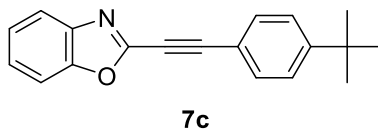

**2-[(4-*tert*-Butylphenyl)ethynyl]benzoxazole 7c.** Yield: 50% (138 mg, 501  $\mu\text{mol}$ ). Solvent system for flash column chromatography: cyclohexane/EtOAc: 95/5; Pale yellow solid; Mp: 90  $^{\circ}\text{C}$ ;  $^1\text{H}$  NMR (300 MHz,  $\text{CDCl}_3$ ):  $\delta$  7.78-7.72 (m, 1H), 7.60 (d,  $J$  = 8.3 Hz, 2H), 7.54-7.48 (m, 1H), 7.42 (d,  $J$  = 8.3 Hz, 2H), 7.39-7.32 (m, 2H), 1.32 (s, 9H);  $^{13}\text{C}$  NMR (75 MHz,  $\text{CDCl}_3$ ):  $\delta$  154.0, 150.4, 148.0, 141.2, 132.3, 126.2, 125.7, 125.0, 120.4, 117.2, 110.6, 93.9, 77.1, 35.1, 31.1; IR (ATR):  $\nu_{\text{max}}$  2961, 2925, 2221, 1549, 1450, 1242, 1147, 1136, 1100, 940, 834, 740  $\text{cm}^{-1}$ ; ESIHRMS  $m/z$  calcd for  $\text{C}_{19}\text{H}_{18}\text{NO}$   $[\text{M}+\text{H}]^+$  276.1388, found 276.1397.

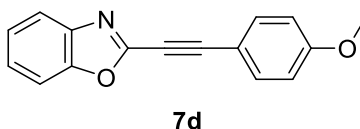

**2-[(4-Methoxyphenyl)ethynyl]benzoxazole 7d.** Yield: 46% (116 mg, 465  $\mu\text{mol}$ ). Solvent system for flash column chromatography: cyclohexane/EtOAc: 85/15; Pale yellow solid. This compound has been previously reported.<sup>S4</sup>

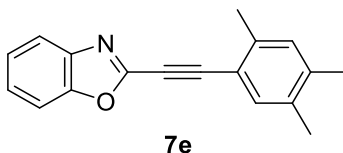

**2-[(2,4,5-Trimethylphenyl)ethynyl]benzoxazole 7e.** Yield: 60% (125 mg, 478  $\mu\text{mol}$ ). Solvent system for flash column chromatography: cyclohexane/EtOAc: 95/5; Pale yellow solid; Mp: 112  $^{\circ}\text{C}$ ;  $^1\text{H}$  NMR (300 MHz,  $\text{CDCl}_3$ ):  $\delta$  7.78-7.71 (m, 1H), 7.55-7.48 (m, 1H), 7.42-7.32 (m, 2H), 7.37 (obs. s, 1H), 7.01 (s, 1H), 2.50 (s, 3H), 2.24 (s, 3H), 2.21 (s, 3H);  $^{13}\text{C}$  NMR (75 MHz,  $\text{CDCl}_3$ ):  $\delta$  150.3, 148.2, 141.1, 139.7, 139.1, 134.2, 133.7, 131.2, 126.1, 124.9, 120.3, 117.2, 110.5, 93.3, 80.4, 20.1,

<sup>S4</sup> Matsuyama, N.; Kitahara, M.; Hirano, K.; Satoh, T.; Miura, M. *Org. Lett.* **2010**, *12*, 2358.

19.9, 19.1; IR (ATR):  $\nu_{\text{max}}$  2917, 2215, 1546, 1448, 1340, 1235, 1159, 1066, 934, 879, 742  $\text{cm}^{-1}$ ; ESIHRMS  $m/z$  calcd for  $\text{C}_{18}\text{H}_{16}\text{NO}$   $[\text{M}+\text{H}]^+$  262.1232, found 262.1228.

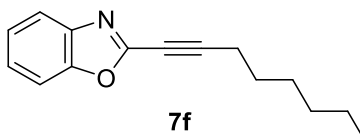

**2-(Oct-1-yn-1-yl)benzoxazole 7f.** Yield: 40% (90 mg, 396  $\mu\text{mol}$ ). Solvent system for flash column chromatography: cyclohexane/EtOAc: 95/5; Pale yellow oil. This compound has been previously reported.<sup>S3</sup>

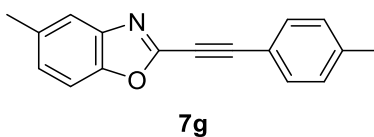

**5-Methyl-2-[(4-methylphenyl)ethynyl]benzoxazole 7g.** Yield: 47% (117 mg, 473  $\mu\text{mol}$ ). Solvent system for flash column chromatography: cyclohexane/EtOAc: 95/5; White solid. This compound has been previously reported.<sup>S5</sup>

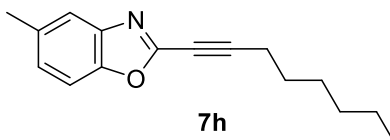

**5-Methyl-2-(oct-1-yn-1-yl)benzoxazole 7h.** Yield: 42% (101 mg, 418  $\mu\text{mol}$ ). Solvent system for flash column chromatography: cyclohexane/EtOAc: 95/5; Pale yellow oil. This compound has been previously reported.<sup>S5</sup>

<sup>S5</sup> Kim, S. H.; Chang, S. *Org. Lett.* **2010**, *12*, 1868.

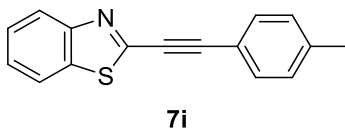

**2-[(4-Methylphenyl)ethynyl]benzothiazole 7i.** Yield: 52% (131 mg, 525  $\mu$ mol). Solvent system for flash column chromatography: cyclohexane/EtOAc: 95/5; Pale yellow solid. This compound has been previously reported.<sup>S6</sup>

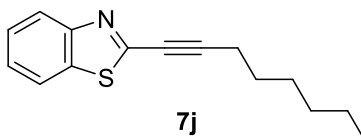

**2-(Oct-1-yn-1-yl)benzothiazole 7j.** Yield: 41% (90 mg, 396  $\mu$ mol). Solvent system for flash column chromatography: cyclohexane/EtOAc: 95/5; Pale yellow oil. This compound has been previously reported.<sup>S6</sup>

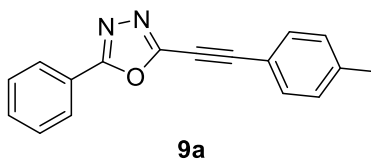

**2-[(4-Methylphenyl)ethynyl]-5-phenyl-1,3,4-oxadiazole 9a.** Yield: 65% (170 mg, 653  $\mu$ mol). Solvent system for flash column chromatography: cyclohexane/EtOAc: 95/5; White solid. This compound has been previously reported.<sup>S7</sup>

<sup>S6</sup> Lu, L.; Yan, H.; Sun, P.; Zhu, Y.; Yang, H.; Liu, D.; Rong, G.; Mao, J. *Eur. J. Org. Chem.* **2013**, 1644.

<sup>S7</sup> Kitahara, M.; Hirano, K.; Tsurugi, H.; Satoh, T.; Miura, M. *Chem. Eur. J.* **2010**, *16*, 1772.

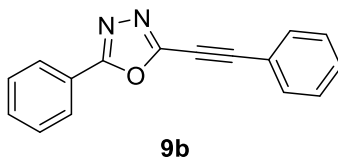

**2-(Phenylethynyl)-5-phenyl-1,3,4-oxadiazole 9b.** Yield: 50% (122 mg, 495  $\mu\text{mol}$ ). Solvent system for flash column chromatography: cyclohexane/EtOAc: 95/5; Pale yellow solid. This compound has been previously reported.<sup>58</sup>

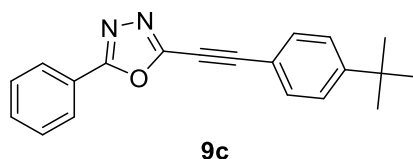

**2-[(4-*tert*-Butylphenyl)ethynyl]-5-phenyl-1,3,4-oxadiazole 9c.** Yield: 71% (185 mg, 711  $\mu\text{mol}$ ). Solvent system for flash column chromatography: cyclohexane/EtOAc: 95/5; Pale yellow solid; Mp: 104  $^{\circ}\text{C}$ ;  $^1\text{H}$  NMR (300 MHz,  $\text{CDCl}_3$ ):  $\delta$  8.05 (dd,  $J$  = 8.1 and 1.8 Hz, 2H), 7.54 (d,  $J$  = 8.6 Hz, 2H), 7.51-7.42 (m, 3H), 7.39 (d,  $J$  = 8.6 Hz, 2H), 1.29 (s, 9H);  $^{13}\text{C}$  NMR (75 MHz,  $\text{CDCl}_3$ ):  $\delta$  164.6, 154.2, 150.7, 132.1, 132.0, 129.1, 127.0, 125.7, 123.3, 116.6, 97.6, 72.7, 35.0, 31.0; IR (ATR):  $\nu_{\text{max}}$  2959, 2225, 1540, 1482, 1450, 1362, 1269, 1171, 1091, 1012, 831, 775, 713, 688  $\text{cm}^{-1}$ ; ESIHRMS  $m/z$  calcd for  $\text{C}_{20}\text{H}_{19}\text{N}_2\text{O}$   $[\text{M}+\text{H}]^+$  303.1497, found 303.1496.

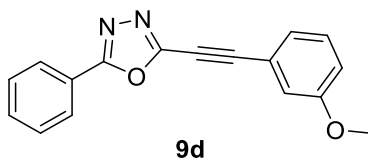

**2-[(3-Methoxyphenyl)ethynyl]-5-phenyl-1,3,4-oxadiazole 9d.** Yield: 48% (132 mg, 478  $\mu\text{mol}$ ). Solvent system for flash column chromatography: cyclohexane/EtOAc: 90/10; Pale yellow solid; Mp: 106  $^{\circ}\text{C}$ ;  $^1\text{H}$  NMR (300 MHz,  $\text{CDCl}_3$ ):  $\delta$  8.06 (dd,  $J$  = 8.1 and 1.4 Hz, 2H), 7.57-7.44 (m, 3H), 7.32-

<sup>58</sup> Besselièvre, F.; Piguel, S. *Angew. Chem., Int. Ed.* **2009**, *48*, 9553.

7.17 (m, 2H), 7.14-7.10 (m, 1H), 7.02-6.95 (m, 1H), 3.79 (s, 3H);  $^{13}\text{C}$  NMR (75 MHz,  $\text{CDCl}_3$ ):  $\delta$ 159.4, 132.2, 129.8, 129.2 (2C), 127.1 (2C), 124.8, 123.3, 120.7, 117.4, 116.9, 97.1, 77.9, 55.4; IR (ATR):  $\nu_{\text{max}}$  2919, 2233, 1606, 1574, 1548, 1539, 1448, 1427, 1290, 1229, 1144, 1051, 892, 789, 712, 686  $\text{cm}^{-1}$ ; ESIHRMS  $m/z$  calcd for  $\text{C}_{17}\text{H}_{13}\text{N}_2\text{O}_2$   $[\text{M}+\text{H}]^+$  277.0977, found 277.0981.

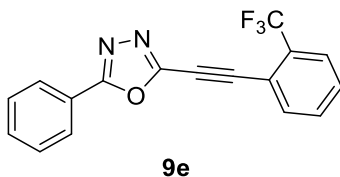

**2-[(2-Trifluoromethylphenyl)ethynyl]-5-phenyl-1,3,4-oxadiazole 9e.** Yield: 63% (198 mg, 630  $\mu\text{mol}$ ). Solvent system for flash column chromatography: cyclohexane/EtOAc: 95/5; Pale yellow solid; Mp: 112  $^{\circ}\text{C}$ ,  $^1\text{H}$  NMR (300 MHz,  $\text{CDCl}_3$ ):  $\delta$ 8.01 (d,  $J$  = 7.5 Hz, 2H), 7.73 (d,  $J$  = 7.3 Hz, 1H), 7.67 (d,  $J$  = 7.2 Hz, 1H), 7.60-7.39 (m, 5H);  $^{13}\text{C}$  NMR (75 MHz,  $\text{CDCl}_3$ ):  $\delta$ 165.0, 150.1, 134.7, 132.2, 132.2 (q,  $J$  = 31.1 Hz), 131.8, 130.5, 129.1, 127.1, 126.2 (q,  $J$  = 4.9 Hz), 123.1 (q,  $J$  = 271.9 Hz), 123.0, 117.7 (q,  $J$  = 2.1 Hz), 92.4, 77.7;  $^{19}\text{F}$  NMR (376 MHz,  $\text{CDCl}_3$ ):  $\delta$ 62.3 (s); IR (neat):  $\nu_{\text{max}}$  2942, 2232, 1545, 1530, 1482, 1449, 1322, 1264, 1163, 1124, 1112, 1059, 1034, 770, 713, 667, 656  $\text{cm}^{-1}$ ; ESIHRMS  $m/z$  calcd for  $\text{C}_{17}\text{H}_{10}\text{N}_2\text{OF}_3$   $[\text{M}+\text{H}]^+$  315.0745, found 315.0753.

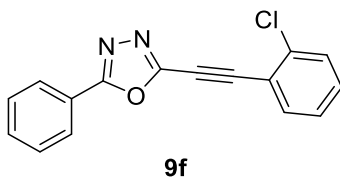

**2-[(2-Chlorophenyl)ethynyl]-5-phenyl-1,3,4-oxadiazole 9f.** Yield: 50% (142 mg, 506  $\mu\text{mol}$ ). Solvent system for flash column chromatography: cyclohexane/EtOAc: 95/5; Pale yellow solid; Mp: 120  $^{\circ}\text{C}$ ;  $^1\text{H}$  NMR (300 MHz,  $\text{CDCl}_3$ ):  $\delta$ 8.08 (dd,  $J$  = 7.8 and 1.4 Hz, 2H), 7.64 (dd,  $J$  = 7.5 and 1.4 Hz, 1H), 7.59-7.42 (m, 4H), 7.42-7.26 (m, 2H);  $^{13}\text{C}$  NMR (75 MHz,  $\text{CDCl}_3$ ):  $\delta$ 165.0, 150.4, 136.8, 134.2, 132.3, 131.7, 129.7, 129.2, 127.2, 126.8, 123.3, 120.1, 93.6, 77.5; IR (neat):  $\nu_{\text{max}}$  2920,

2851, 2221, 1529, 1481, 1463, 1450, 1093, 1064, 765, 712, 691  $\text{cm}^{-1}$ ; ESIHRMS  $m/z$  calcd for  $\text{C}_{16}\text{H}_{10}\text{N}_2\text{OCl}$   $[\text{M}+\text{H}]^+$  281.0482, found 281.0483.

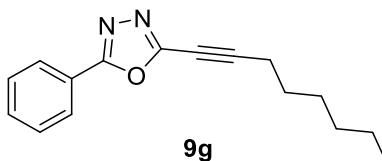

**2-(Oct-1-yn-1-yl)-5-phenyl-1,3,4-oxadiazole 9g.** Yield: 54% (138 mg, 543  $\mu\text{mol}$ ). Solvent system for flash column chromatography: cyclohexane/EtOAc: 95/5; White solid. This compound has been previously reported.<sup>S9</sup>

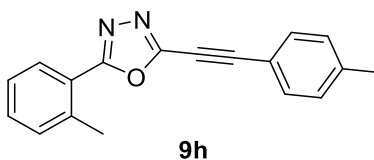

**5-(2-Methylphenyl)-2-[(4-methylphenyl)ethynyl]-1,3,4-oxadiazole 9h.** Yield: 52% (143 mg, 521  $\mu\text{mol}$ ). Solvent system for flash column chromatography: cyclohexane/EtOAc: 90/10; White solid; Mp: 102  $^{\circ}\text{C}$ ;  $^1\text{H}$  NMR (300 MHz,  $\text{CDCl}_3$ ):  $\delta$  7.96 (d,  $J$  = 7.9 Hz, 1H), 7.52 (d,  $J$  = 8.1 Hz, 2H), 7.45-7.37 (m, 1H), 7.35-7.27 (m, 2H), 7.19 (d,  $J$  = 7.9 Hz, 2H), 2.73 (s, 3H), 2.37 (s, 3H);  $^{13}\text{C}$  NMR (75 MHz,  $\text{CDCl}_3$ ):  $\delta$  141.2, 138.7, 132.3 (2C), 131.8, 131.6, 129.5 (2C), 129.1, 126.2, 122.4, 116.8, 97.6, 72.8, 22.2, 21.7; IR (neat):  $\nu_{\text{max}}$  2925, 2226, 1538, 1488, 1455, 1387, 1170, 1065, 1015, 960, 817, 772, 725  $\text{cm}^{-1}$ ; ESIHRMS  $m/z$  calcd for  $\text{C}_{18}\text{H}_{15}\text{N}_2\text{O}$   $[\text{M}+\text{H}]^+$  275.1184, found 275.1185.

<sup>S9</sup> Kawano, T.; Matsuyama, N.; Hirano, K.; Satoh, T.; Miura, M. *J. Org. Chem.* **2010**, *75*, 1764.

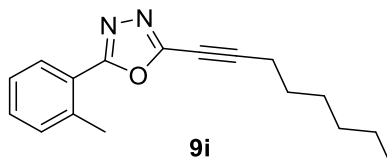

**5-(2-Methylphenyl)-2-(Oct-1-yn-1-yl)-1,3,4-oxadiazole 9i.** Yield: 51% (137 mg, 510  $\mu\text{mol}$ ). Solvent system for flash column chromatography: cyclohexane/EtOAc: 90/10; Pale yellow oil;  $^1\text{H}$  NMR (300 MHz,  $\text{CDCl}_3$ ):  $\delta$  7.90 (d,  $J$  = 8.0 Hz, 1H), 7.42-7.34 (m, 1H), 7.33-7.24 (m, 2H), 2.69 (s, 3H), 2.49 (t,  $J$  = 7.0 Hz, 2H), 1.65 (app. quint.,  $J$  = 6.8 Hz, 2H), 1.51-1.38 (m, 2H), 1.36-1.24 (m, 4H), 0.88 (t,  $J$  = 6.8 Hz, 3H);  $^{13}\text{C}$  NMR (75 MHz,  $\text{CDCl}_3$ ):  $\delta$  164.7, 150.2, 138.6, 131.8, 131.5, 129.1, 126.2, 122.5, 100.3, 65.3, 31.3, 28.6, 27.6, 22.5, 22.1, 19.5, 14.0; IR (ATR):  $\nu_{\text{max}}$  2930, 2859, 2244, 1530, 1490, 1456, 1242, 1031, 775, 730, 672  $\text{cm}^{-1}$ ; ESIHRMS  $m/z$  calcd for  $\text{C}_{17}\text{H}_{21}\text{N}_2\text{O}$   $[\text{M}+\text{H}]^+$  269.1654, found 269.1651.

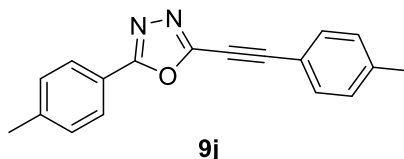

**5-(4-Methylphenyl)-2-[(4-methylphenyl)ethynyl]-1,3,4-oxadiazole 9j.** Yield: 55% (150 mg, 547  $\mu\text{mol}$ ). Solvent system for flash column chromatography: cyclohexane/EtOAc: 95/5; White solid. This compound has been previously reported.<sup>57</sup>

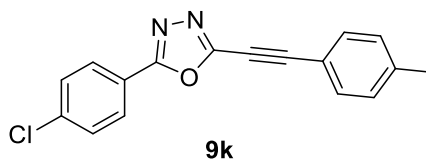

**5-(4-Chlorophenyl)-2-[(4-methylphenyl)ethynyl]-1,3,4-oxadiazole 9k.** Yield: 49% (144 mg, 488  $\mu\text{mol}$ ). Solvent system for flash column chromatography: cyclohexane/EtOAc: 95/5; Pale yellow solid. This compound has been previously reported.<sup>57</sup>

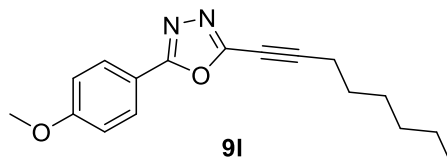

**5-(4-Methoxyphenyl)-2-(Oct-1-yn-1-yl)-1,3,4-oxadiazole 9I.** Yield: 48% (125 mg, 480  $\mu$ mol). Solvent system for flash column chromatography: cyclohexane/EtOAc: 90/10; Pale yellow oil;  $^1\text{H}$  NMR (300 MHz,  $\text{CDCl}_3$ ):  $\delta$  7.95 (d,  $J$  = 9.0 Hz, 2H), 6.95 (d,  $J$  = 9.0 Hz, 2H), 3.83 (s, 3H), 2.47 (t,  $J$  = 7.0 Hz, 2H), 1.63 (app. quint.,  $J$  = 6.8 Hz, 2H), 1.50-1.37 (m, 2H), 1.34-1.24 (m, 4H), 0.87 (t,  $J$  = 6.8 Hz, 3H);  $^{13}\text{C}$  NMR (75 MHz,  $\text{CDCl}_3$ ):  $\delta$  164.4, 162.6, 150.1, 128.8, 116.0, 114.6, 100.0, 65.4, 55.5, 31.3, 28.6, 27.6, 22.5, 19.5, 14.1; IR (ATR):  $\nu_{\text{max}}$  2930, 2244, 1613, 1532, 1496, 1426, 1307, 1256, 1174, 1094, 1026, 838, 743, 710  $\text{cm}^{-1}$ ; ESIHRMS  $m/z$  calcd for  $\text{C}_{17}\text{H}_{21}\text{N}_2\text{O}_2$   $[\text{M}+\text{H}]^+$  285.1603, found 285.1606.

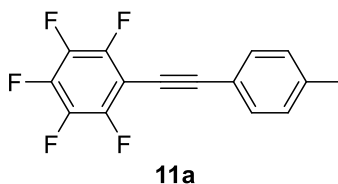

**1,2,3,4,5-Pentafluoro-6-[(4-methylphenyl)ethynyl]benzene 11a.** Yield: 77% (218 mg, 772  $\mu$ mol), 70% (1.97 g, 7.0 mmol). Solvent system for flash column chromatography: pentane; White solid. This compound has been previously reported.<sup>S10</sup>

<sup>S10</sup> Wei, Y.; Zhao, H.; Kan, J.; Su, W.; Hong, M. *J. Am. Chem. Soc.* **2010**, *132*, 2522.

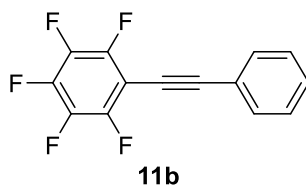

**1,2,3,4,5-Pentafluoro-6-(phenylethynyl)benzene 11b.** Yield: 57% (152 mg, 567  $\mu\text{mol}$ ). Solvent system for flash column chromatography: pentane; White solid. This compound has been previously reported.<sup>S4</sup>

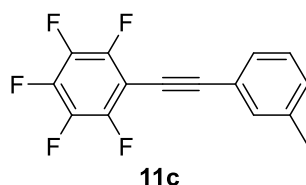

**1,2,3,4,5-Pentafluoro-6-[(3-methylphenyl)ethynyl]benzene 11c.** Yield: 64% (182 mg, 645  $\mu\text{mol}$ ). Solvent system for flash column chromatography: pentane; White solid; Mp: 87 °C;  $^1\text{H}$  NMR (300 MHz,  $\text{CDCl}_3$ ):  $\delta$  7.40 (s, 1H), 7.39 (app. d,  $J$  = 7.4 Hz, 1H), 7.32-7.20 (m, 2H), 2.38 (s, 3H);  $^{13}\text{C}$  NMR (75 MHz,  $\text{CDCl}_3$ ):  $\delta$  147.3 (dm,  $J$  = 253.3 Hz), 141.5 (dm,  $J$  = 254.8 Hz), 138.5, 137.9 (dm,  $J$  = 253.3 Hz), 132.5, 130.7, 129.1, 128.5, 121.5, 102.0 (app. q,  $J$  = 3.4 Hz), 100.5 (m), 72.8 (app. q,  $J$  = 3.7 Hz), 21.3;  $^{19}\text{F}$  NMR (376 MHz,  $\text{CDCl}_3$ ):  $\delta$  -136.6 (dd,  $J$  = 21.1 and 6.6 Hz, 2F), -153.5 (t,  $J$  = 20.8 Hz, 1F), -162.4 (td,  $J$  = 20.8 and 6.6 Hz, 2F); IR (ATR):  $\nu_{\text{max}}$  2928, 2246, 1518, 1460, 1112, 982, 789, 690  $\text{cm}^{-1}$ ; EIHRMS  $m/z$  calcd for  $\text{C}_{15}\text{H}_7\text{F}_5$   $[\text{M}]^+$  282.0468, found 282.0471.

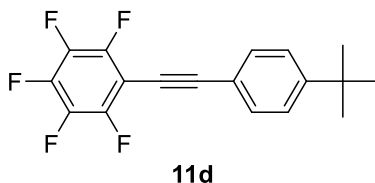

**1,2,3,4,5-Pentafluoro-6-[(4-*tert*-butylphenyl)ethynyl]benzene 11d.** Yield: 72% (232 mg, 715  $\mu\text{mol}$ ). Solvent system for flash column chromatography: pentane; Beige solid. This compound has been previously reported.<sup>S10</sup>

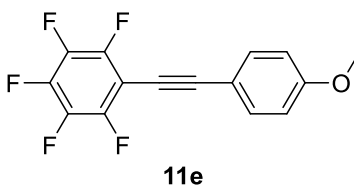

**1,2,3,4,5-Pentafluoro-6-[(4-methoxyphenyl)ethynyl]benzene 11e.** Yield: 79% (233 mg, 781  $\mu\text{mol}$ ). Solvent system for flash column chromatography: cyclohexane/EtOAc: 95/5; Beige solid. This compound has been previously reported.<sup>S10</sup>

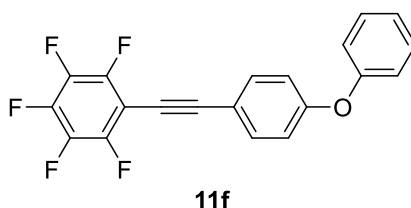

**1,2,3,4,5-Pentafluoro-6-[(4-phenoxyphenyl)ethynyl]benzene 11f.** Yield: 68% (122 mg, 339  $\mu\text{mol}$ ). Solvent system for flash column chromatography: pentane; White solid; Mp: 90 °C;  $^1\text{H}$  NMR (300 MHz,  $\text{CDCl}_3$ ):  $\delta$  7.54 (d,  $J = 6.7$  Hz, 2H), 7.40 (app. t,  $J = 7.7$  Hz, 2H), 7.19 (app. t,  $J = 7.3$  Hz, 1H), 7.07 (d,  $J = 7.7$  Hz, 2H), 7.00 (d,  $J = 8.7$  Hz, 2H);  $^{13}\text{C}$  NMR (75 MHz,  $\text{CDCl}_3$ ):  $\delta$  159.1, 156.1, 147.2 (dm,  $J = 250.0$  Hz), 141.4 (dm,  $J = 254.5$  Hz), 137.8 (dm,  $J = 251.3$  Hz), 133.8, 130.1, 124.4, 119.9, 118.3, 115.9, 101.5 (app. q,  $J = 3.4$  Hz), 100.6 (m), 72.6 (app. q,  $J = 3.7$  Hz);  $^{19}\text{F}$  NMR (376 MHz,  $\text{CDCl}_3$ ):  $\delta$  -136.7 (dd,  $J = 21.2$  and 6.8 Hz, 2F), -153.6 (t,  $J = 20.7$  Hz, 1F), -162.4 (td,  $J = 20.8$  and 6.6 Hz, 2F); IR (ATR):  $\nu_{\text{max}}$  2227, 1587, 1522, 1496, 1446, 1249, 1166, 1111, 982, 964, 903, 873, 761, 693  $\text{cm}^{-1}$ ; EIHRMS  $m/z$  calcd for  $\text{C}_{20}\text{H}_9\text{OF}_5$   $[\text{M}]^+$  360.0574, found 360.0571.

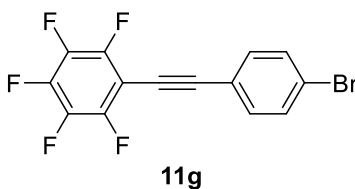

**1,2,3,4,5-Pentafluoro-6-[(4-bromophenyl)ethynyl]benzene 11g.** Yield: 58% (75 mg, 216  $\mu\text{mol}$ ). Solvent system for flash column chromatography: cyclohexane/EtOAc: 95/5; White solid. This compound has been previously reported.<sup>S10</sup>

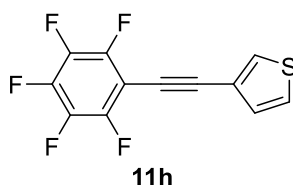

**1,2,3,4,5-Pentafluoro-6-[(thiophen-3-yl)ethynyl]benzene 11h.** Yield: 62% (171 mg, 623  $\mu\text{mol}$ ). Solvent system for flash column chromatography: pentane; White solid; Mp: 81  $^{\circ}\text{C}$ ;  $^1\text{H}$  NMR (300 MHz,  $\text{CDCl}_3$ ):  $\delta$  7.65 (dd,  $J$  = 2.9 and 1.1 Hz, 1H), 7.34 (dd,  $J$  = 5.0 and 3.0 Hz, 1H), 7.23 (dd,  $J$  = 5.0 and 1.1 Hz, 1H);  $^{13}\text{C}$  NMR (75 MHz,  $\text{CDCl}_3$ ):  $\delta$  147.2 (dm,  $J$  = 251.3 Hz), 141.5 (dm,  $J$  = 254.4 Hz), 137.8 (dm,  $J$  = 253.8 Hz), 130.9, 129.8, 126.0, 120.8, 100.4 (m), 96.9 (app. q,  $J$  = 3.3 Hz), 72.8 (app. q,  $J$  = 3.7 Hz);  $^{19}\text{F}$  NMR (376 MHz,  $\text{CDCl}_3$ ):  $\delta$  -136.6 (dd,  $J$  = 21.0 and 6.2 Hz, 2F), -153.3 (t,  $J$  = 20.8 Hz, 1F), -162.3 (td,  $J$  = 20.7 and 6.6 Hz, 2F); IR (ATR):  $\nu_{\text{max}}$  2230, 1531, 1499, 984, 900, 872, 821, 782, 623  $\text{cm}^{-1}$ ; EIHRMS  $m/z$  calcd for  $\text{C}_{12}\text{H}_3\text{SF}_5$   $[\text{M}]^+$  273.9876, found 273.9874.

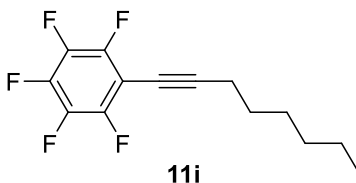

**1,2,3,4,5-Pentafluoro-6-(oct-1-yn-1-yl)benzene 11i.** Yield: 71% (195 mg, 706  $\mu\text{mol}$ ). Solvent system for flash column chromatography: pentane; Colorless oil;  $^1\text{H}$  NMR (300 MHz,  $\text{CDCl}_3$ ):  $\delta$  2.49 (t,  $J$  = 7.0 Hz, 2H), 1.64 (app. quint.,  $J$  = 7.7 Hz, 2H), 1.52-1.41 (m, 2H), 1.39-1.24 (m, 4H),

0.90 (t,  $J = 6.9$  Hz, 3H);  $^{13}\text{C}$  NMR (75 MHz,  $\text{CDCl}_3$ ):  $\delta$  147.6 (dm,  $J = 250.5$  Hz), 141.0 (dm,  $J = 254.7$  Hz), 137.7 (dm,  $J = 252.2$  Hz), 104.3 (app. q,  $J = 3.2$  Hz), 100.9 (m), 64.8 (app. q,  $J = 3.5$  Hz), 31.4, 28.6, 28.3, 22.7, 19.9, 14.1;  $^{19}\text{F}$  NMR (376 MHz,  $\text{CDCl}_3$ ):  $\delta$  -137.7 (dd,  $J = 21.4$  and  $7.1$  Hz, 2F), -154.9 (t,  $J = 20.8$  Hz, 1F), -163.0 (td,  $J = 20.8$  and  $6.6$  Hz, 2F); IR (ATR):  $\nu_{\text{max}}$  2934, 2247, 1519, 1498, 1050, 990, 841, 727  $\text{cm}^{-1}$ ; EIHRMS  $m/z$  calcd for  $\text{C}_{14}\text{H}_{13}\text{F}_5$   $[\text{M}]^+$  276.0937, found 276.0940.

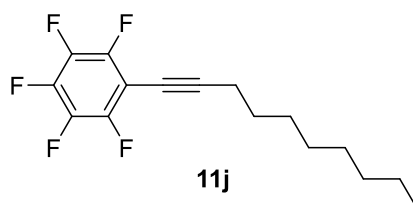

**1,2,3,4,5-Pentafluoro-6-(dec-1-yn-1-yl)benzene<sup>S11</sup> 11j.** Yield: 78% (248 mg, 777  $\mu\text{mol}$ ). Colorless oil;  $^1\text{H}$  NMR (300 MHz,  $\text{CDCl}_3$ ):  $\delta$  2.49 (t,  $J = 7.0$  Hz, 2H), 1.64 (app. quint.,  $J = 7.7$  Hz, 2H), 1.52-1.40 (m, 2H), 1.38-1.21 (m, 8H), 0.86 (t,  $J = 6.9$  Hz, 3H);  $^{13}\text{C}$  NMR (75 MHz,  $\text{CDCl}_3$ ):  $\delta$  147.6 (dm,  $J = 251.1$  Hz), 141.0 (dm,  $J = 253.9$  Hz), 137.7 (dm,  $J = 251.1$  Hz), 104.3 (app. q,  $J = 3.3$  Hz), 100.9 (m), 64.8 (app. q,  $J = 3.7$  Hz), 32.0, 29.3, 29.2, 28.9, 28.3, 22.8, 19.9, 14.2;  $^{19}\text{F}$  NMR (376 MHz,  $\text{CDCl}_3$ ):  $\delta$  -137.6 (dd,  $J = 21.4$  and  $7.1$  Hz, 2F), -154.9 (t,  $J = 20.8$  Hz, 1F), -163.0 (td,  $J = 20.8$  and  $6.6$  Hz, 2F); IR (ATR):  $\nu_{\text{max}}$  2929, 2858, 2247, 1519, 1498, 1048, 990, 841, 727  $\text{cm}^{-1}$ ; EIHRMS  $m/z$  calcd for  $\text{C}_{16}\text{H}_{17}\text{F}_5$   $[\text{M}]^+$  304.1250, found 304.1247.

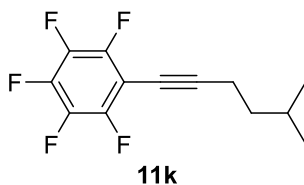

**1,2,3,4,5-Pentafluoro-6-(5-methylhex-1-yn-1-yl)benzene 11k.** Yield: 84% (110 mg, 419  $\mu\text{mol}$ ). Solvent system for flash column chromatography: pentane; Colorless volatile oil;  $^1\text{H}$  NMR (300 MHz,  $\text{CDCl}_3$ ):  $\delta$  2.50 (t,  $J = 7.3$  Hz, 2H), 1.76 (app. non.,  $J = 6.7$  Hz, 1H), 1.54 (app. q,  $J = 7.2$  Hz, 2H),

<sup>S11</sup> Chen, Q.-Y.; Li, Z.-T. *J. Chem. Soc., Perkin Trans. 1*, **1992**, 2931.

0.94 (d,  $J = 6.6$  Hz, 6H);  $^{13}\text{C}$  NMR (75 MHz,  $\text{CDCl}_3$ ):  $\delta$  147.6 (dm,  $J = 249.9$  Hz), 141.0 (dm,  $J = 254.2$  Hz), 137.8 (dm,  $J = 254.2$  Hz), 104.3 (app. q,  $J = 3.2$  Hz), 100.9 (m), 64.7 (app. q,  $J = 3.7$  Hz), 37.2, 27.5, 22.2, 18.0;  $^{19}\text{F}$  NMR (376 MHz,  $\text{CDCl}_3$ ):  $\delta$  -137.7 (dd,  $J = 21.5$  and  $7.1$  Hz, 2F), -154.9 (t,  $J = 20.8$  Hz, 1F), -163.0 (td,  $J = 20.8$  and  $6.6$  Hz, 2F); IR (ATR):  $\nu_{\text{max}}$  2961, 2248, 1518, 1496, 1079, 1052, 989, 727  $\text{cm}^{-1}$ ; EIHRMS  $m/z$  calcd for  $\text{C}_{13}\text{H}_{11}\text{F}_5$   $[\text{M}]^+$  262.0781, found 262.0779.

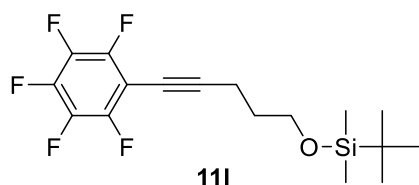

**1,2,3,4,5-Pentafluoro-6-[5-(tert-butyldimethylsilyloxy)pent-1-yn-1-yl]benzene 11I.** Yield: 71% (130 mg, 357  $\mu\text{mol}$ ). Solvent system for flash column chromatography: pentane; Colorless oil;  $^1\text{H}$  NMR (300 MHz,  $\text{CDCl}_3$ ):  $\delta$  3.76 (t,  $J = 5.9$  Hz, 2H), 2.60 (t,  $J = 6.9$  Hz, 2H), 1.83 (app. quint.,  $J = 6.3$  Hz, 2H), 0.90 (s, 9H), 0.07 (s, 6H);  $^{13}\text{C}$  NMR (75 MHz,  $\text{CDCl}_3$ ):  $\delta$  147.6 (dm,  $J = 250.8$  Hz), 141.1 (dm,  $J = 253.7$  Hz), 137.8 (dm,  $J = 252.0$  Hz), 103.8 (app. q,  $J = 3.3$  Hz), 100.8 (m), 64.9 (app. q,  $J = 3.4$  Hz), 61.4, 31.3, 26.0, 18.5, 16.4, 5.3;  $^{19}\text{F}$  NMR (376 MHz,  $\text{CDCl}_3$ ):  $\delta$  -137.5 (dd,  $J = 21.6$  and  $7.4$  Hz, 2F), -154.6 (t,  $J = 20.7$  Hz, 1F), -162.8 (td,  $J = 20.8$  and  $6.6$  Hz, 2F); IR (ATR):  $\nu_{\text{max}}$  2955, 2859, 2248, 1519, 1499, 1473, 1255, 1106, 1048, 990, 836, 776, 715, 664  $\text{cm}^{-1}$ ; EIHRMS  $m/z$  calcd for  $\text{C}_{17}\text{H}_{21}\text{OF}_5\text{Si}$   $[\text{M}]^+$  364.1282, found 364.1280.

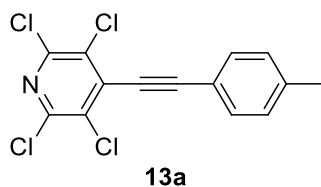

**2,3,5,6-Tetrachloro-4-[(4-methylphenyl)ethynyl]pyridine 13a.** Following the general procedure using (*p*-tolylacetylene)copper (90 mg, 0.5 mmol), 2,3,5,6-tetrachloropyridine (434 mg, 2.0 mmol),  $^t\text{BuOLi}$  (40 mg, 0.5 mmol) and 1,10-phenanthroline (450 mg, 2.5 mmol) in DMF (4 mL); Yield: 60% (100 mg, 302  $\mu\text{mol}$ ). Solvent system for flash column chromatography: pentane; Pale

yellow solid; Mp: 164 °C;  $^1\text{H}$  NMR (300 MHz,  $\text{CDCl}_3$ ):  $\delta$  7.52 (d,  $J$  = 8.1 Hz, 2H), 7.21 (d,  $J$  = 7.9 Hz, 2H), 2.41 (s, 3H);  $^{13}\text{C}$  NMR (75 MHz,  $\text{CDCl}_3$ ):  $\delta$  146.0, 141.4, 135.4, 132.5, 130.7, 129.6, 117.9, 107.7, 82.1, 21.9; IR (ATR):  $\nu_{\text{max}}$  2918, 2217, 1534, 1315, 1266, 926, 816, 706  $\text{cm}^{-1}$ ; ESIHRMS  $m/z$  calcd for  $\text{C}_{14}\text{H}_8\text{NCl}_4$   $[\text{M}+\text{H}]^+$  329.9411, found 329.9417.

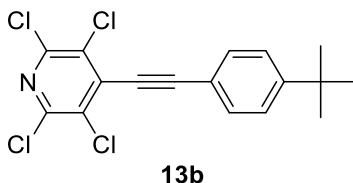

**2,3,5,6-Tetrachloro-4-[(4-*tert*-butylphenyl)ethynyl]pyridine 13b.** Following the general procedure using (*p-tert*-butylacetylene)copper (110 mg, 0.5 mmol), 2,3,5,6-tetrachloropyridine (434 mg, 2.0 mmol),  $t\text{BuOLi}$  (40 mg, 0.5 mmol) and 1,10-phenanthroline (450 mg, 2.5 mmol) in DMF (4 mL); Yield: 64% (120 mg, 322  $\mu\text{mol}$ ). Solvent system for flash column chromatography: cyclohexane; White solid; Mp: 197 °C;  $^1\text{H}$  NMR (300 MHz,  $\text{CDCl}_3$ ):  $\delta$  7.57 (d,  $J$  = 8.3 Hz, 2H), 7.44 (d,  $J$  = 8.5 Hz, 2H), 1.34 (s, 9H);  $^{13}\text{C}$  NMR (75 MHz,  $\text{CDCl}_3$ ):  $\delta$  154.5, 146.0, 135.5, 132.3, 130.8, 125.9, 118.0, 107.6, 82.1, 35.2, 31.2; IR (ATR):  $\nu_{\text{max}}$  2965, 2221, 1534, 1313, 1271, 1113, 931, 834, 706  $\text{cm}^{-1}$ ; ESIHRMS  $m/z$  calcd for  $\text{C}_{17}\text{H}_{14}\text{NCl}_4$   $[\text{M}+\text{H}]^+$  371.9880, found 371.9877.

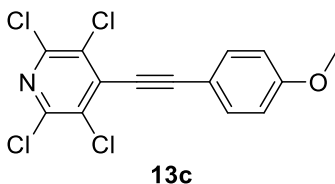

**2,3,5,6-Tetrachloro-4-[(4-methoxyphenyl)ethynyl]pyridine 13c.** Following the general procedure using (*p*-methoxyacetylene)copper (97 mg, 0.5 mmol), 2,3,5,6-tetrachloropyridine (434 mg, 2.0 mmol),  $t\text{BuOLi}$  (40 mg, 0.5 mmol) and 1,10-phenanthroline (450 mg, 2.5 mmol) in DMF (4 mL); Yield: 67% (116 mg, 334  $\mu\text{mol}$ ). Solvent system for flash column chromatography: cyclohexane/EtOAc: 95/5; Yellow solid; Mp: 145 °C;  $^1\text{H}$  NMR (300 MHz,  $\text{CDCl}_3$ ):  $\delta$  7.55 (d,  $J$  = 8.9

Hz, 2H), 6.90 (d,  $J = 8.9$  Hz, 2H), 3.85 (s, 3H);  $^{13}\text{C}$  NMR (75 MHz,  $\text{CDCl}_3$ ):  $\delta$  161.6, 145.9, 135.5, 134.3, 130.4, 114.4, 112.9, 108.0, 82.0, 55.6; IR (ATR):  $\nu_{\text{max}}$  2917, 2214, 1601, 1508, 1313, 1295, 1257, 1165, 1025, 927, 833, 706  $\text{cm}^{-1}$ ; ESIHRMS  $m/z$  calcd for  $\text{C}_{14}\text{H}_8\text{NOCl}_4$   $[\text{M}+\text{H}]^+$  345.9360, found 345.9360.

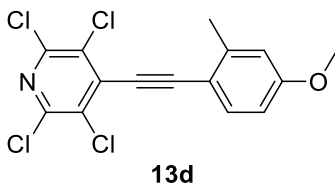

**2,3,5,6-Tetrachloro-4-[(4-methoxy-2-methylphenyl)ethynyl]pyridine 13d.** Following the general procedure using [(4-methoxy-2-methylphenyl)ethynyl]copper (104 mg, 0.5 mmol), 2,3,5,6-tetrachloropyridine (434 mg, 2.0 mmol),  $t\text{BuOLi}$  (40 mg, 0.5 mmol) and 1,10-phenanthroline (450 mg, 2.5 mmol) in DMF (4 mL); Yield: 79% (142 mg, 393  $\mu\text{mol}$ ). Solvent system for flash column chromatography: cyclohexane; Pale yellow solid; Mp: 169  $^{\circ}\text{C}$ ;  $^1\text{H}$  NMR (300 MHz,  $\text{CDCl}_3$ ):  $\delta$  7.54 (d,  $J = 8.5$  Hz, 1H), 6.80 (d,  $J = 2.1$  Hz, 1H), 6.76 (dd,  $J = 6.2$  and 2.3 Hz, 1H), 3.84 (s, 3H), 2.54 (s, 3H);  $^{13}\text{C}$  NMR (75 MHz,  $\text{CDCl}_3$ ):  $\delta$  161.7, 146.0, 144.1, 135.7, 134.9, 130.2, 115.5, 113.1, 112.0, 107.4, 85.7, 55.5, 21.3; IR (ATR):  $\nu_{\text{max}}$  2936, 2201, 1599, 1530, 1311, 1267, 1239, 1033, 908, 850, 706  $\text{cm}^{-1}$ ; ESIHRMS  $m/z$  calcd for  $\text{C}_{15}\text{H}_{10}\text{NOCl}_4$   $[\text{M}+\text{H}]^+$  359.9516, found 359.9519.

## Experimental Procedure and Characterization Data:

## Alkynylation of Complex Substrates and Consecutive Double Alkynylation

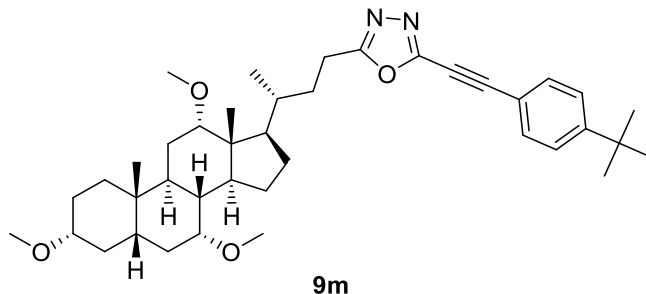

**2-[[4-(*tert*-Butyl)phenyl]ethynyl]-5-[(*R*)-3-[(3*R*,5*S*,7*R*,8*R*,9*S*,10*S*,12*S*,13*R*,14*S*,17*R*)-3,7,12-trimethoxy-10,13-dimethylhexadecahydro-1*H*-cyclopenta[*a*]phenanthren-17-yl]butyl]-1,3,4-oxadiazole 9m.** To a solution of 2-[(*R*)-3-[(3*R*,5*S*,7*R*,8*R*,9*S*,10*S*,12*S*,13*R*,14*S*,17*R*)-3,7,12-trimethoxy-10,13-dimethyl-hexadeca-hydro-1*H*-cyclopenta[*a*]phenanthren-17-yl]butyl]-1,3,4-oxadiazole (178 mg, 375  $\mu$ mol) in acetonitrile (2 mL) were successively added 1,10-phenanthroline (225 mg, 1.25 mmol), lithium *tert*-butoxide (20 mg, 250  $\mu$ mol) and [[4-(*tert*-butyl)phenyl]ethynyl]copper (55 mg, 250  $\mu$ mol). The resulting brownish slurry was vigorously stirred at room temperature under an oxygen atmosphere (balloon) for 3 hours. The reaction mixture was then diluted with EtOAc, filtered over a short plug of silica gel (washed with EtOAc) and concentrated under vacuum. The crude residue was finally purified by flash column chromatography over silica gel (cyclohexane/EtOAc: 70/30) to afford the desired alkynylated 1,3,4-oxadiazole as a pale yellow solid (72 mg, 114  $\mu$ mol, 46%). Mp: 74  $^{\circ}$ C;  $[\alpha]_{\text{D}}^{25} + 28$  (c 1.0,  $\text{CHCl}_3$ );  $^1\text{H}$  NMR (300 MHz,  $\text{CDCl}_3$ ):  $\delta$  7.54 (d,  $J = 8.3$  Hz, 2H), 7.41 (d,  $J = 8.3$  Hz, 2H), 3.39–3.34 (m, 1H), 3.32 (s, 3H), 3.25 (s, 3H), 3.20 (s, 3H), 3.13 (app. d,  $J = 2.4$  Hz, 1H), 3.05–2.72 (m, 3H), 2.31–1.39 (m, 16H), 1.37–1.12 (obs. m, 4H), 1.32 (s, 9H), 1.11–0.80 (obs. m, 2H), 0.98 (d,  $J = 6.4$  Hz, 3H), 0.89 (s, 3H), 0.65 (s, 3H);  $^{13}\text{C}$  NMR (75 MHz,  $\text{CDCl}_3$ ):  $\delta$  168.1, 154.2, 151.1, 132.2, 125.8, 117.0, 96.9, 82.0, 80.8, 77.0, 72.7, 56.0, 55.8, 55.5, 46.3, 46.2, 42.8, 42.0, 39.7, 35.4, 35.2 (2C), 35.0, 34.5, 32.7, 31.2, 28.1, 27.9, 27.5, 26.8, 23.2, 23.0, 22.5, 22.1, 17.5, 12.6; IR (ATR):  $\nu_{\text{max}}$  2931, 2868, 2818, 2230, 1542, 1455, 1369, 1159, 1101, 835  $\text{cm}^{-1}$ ; ESIHRMS  $m/z$  calcd for  $\text{C}_{40}\text{H}_{59}\text{N}_2\text{O}_4$   $[\text{M}+\text{H}]^+$  631.4475, found 631.4474.

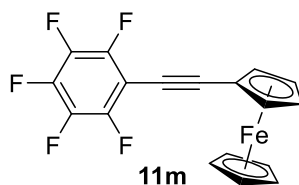

**1,2,3,4,5-Pentafluoro-6-(ferrocenylethynyl)benzene 11m.** Yield: 78% (292 mg, 776  $\mu\text{mol}$ ). Solvent system for flash column chromatography: pentane; Orange solid; Mp: 137  $^{\circ}\text{C}$ ;  $^1\text{H}$  NMR (300 MHz,  $\text{CDCl}_3$ ):  $\delta$  4.58 (app. s, 2H), 4.32 (app. s, 2H), 4.27 (s, 5H);  $^{13}\text{C}$  NMR (75 MHz,  $\text{CDCl}_3$ ):  $\delta$  147.2 (dm,  $J = 250.4$  Hz), 141.0 (dm,  $J = 255.6$  Hz), 137.8 (dm,  $J = 250.6$  Hz), 102.0 (app. q,  $J = 3.4$  Hz), 101.1 (m), 72.1, 70.4, 69.8, 69.2 (app. q,  $J = 3.7$  Hz), 63.0;  $^{19}\text{F}$  NMR (376 MHz,  $\text{CDCl}_3$ ):  $\delta$  -137.2 (dd,  $J = 21.8$  and 7.2 Hz, 2F), -154.6 (t,  $J = 20.7$  Hz, 1F), -162.8 (td,  $J = 20.8$  and 6.4 Hz, 2F); IR (ATR):  $\nu_{\text{max}}$  2934, 2230, 1523, 1498, 1120, 983, 971, 827  $\text{cm}^{-1}$ ; EIHRMS  $m/z$  calcd for  $\text{C}_{18}\text{H}_9\text{F}_5\text{Fe}$   $[\text{M}]^+$  375.9974, found 375.9977.

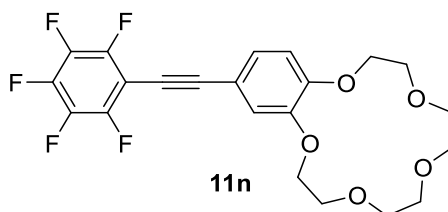

**1,2,3,4,5-Pentafluoro-6-[(2,3,5,6,8,9,11,12-octahydrobenzo[b][1,4,7,10,13]pentaoxacyclopentadecin-15-yl)ethynyl]benzene 11n.** Yield: 57% (75 mg, 164  $\mu\text{mol}$ ). Solvent system for flash column chromatography: EtOAc; Yellow solid; Mp: 102  $^{\circ}\text{C}$ ;  $^1\text{H}$  NMR (400 MHz,  $\text{CDCl}_3$ ):  $\delta$  7.16 (dd,  $J = 8.3$  and 1.8 Hz, 1H), 7.03 (d,  $J = 1.9$  Hz, 1H), 6.83 (d,  $J = 8.3$  Hz, 1H), 4.18-4.13 (m, 4H), 3.95-3.89 (m, 4H), 3.76 (s, 8H);  $^{13}\text{C}$  NMR (100 MHz,  $\text{CDCl}_3$ ):  $\delta$  150.8, 148.8, 147.1 (dm,  $J = 251.6$  Hz), 141.2 (dm,  $J = 255.2$  Hz), 137.8 (dm,  $J = 251.2$  Hz), 126.2, 116.9, 114.0, 113.3, 102.0 (app. q,  $J = 2.8$  Hz), 100.7 (m), 72.0 (app. q,  $J = 3.3$  Hz), 71.2 (2C), 70.5, 70.4, 69.5, 69.4, 69.1, 68.8;  $^{19}\text{F}$  NMR (376 MHz,  $\text{CDCl}_3$ ):  $\delta$  -136.9 (dd,  $J = 21.0$  and 6.7 Hz, 2F), -153.7 (t,  $J = 20.6$  Hz, 1F), -162.5 (td,  $J = 20.7$  and 6.5 Hz, 2F); IR (ATR):  $\nu_{\text{max}}$  2932, 2891, 2220, 1522, 1499, 1448, 1338, 1270, 1246, 1203, 1138, 1051, 1004, 989, 943, 849, 805  $\text{cm}^{-1}$ ;

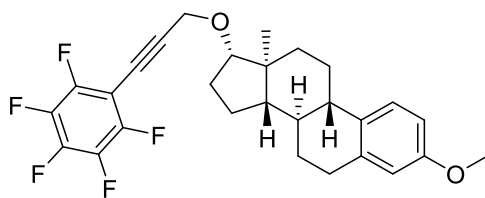**11o**

**O<sub>3</sub>-Methyl-O<sub>17</sub>-[3-(pentafluorophenyl)prop-2-yn-1-yl]estradiol 11o.** Yield: 63% (77 mg, 157  $\mu$ mol). Solvent system for flash column chromatography: cyclohexane/EtOAc: 90/10; White solid; Mp: 102 °C;  $[\alpha]_D^{25}$  - 6 (c 1.0, CHCl<sub>3</sub>); <sup>1</sup>H NMR (400 MHz, CDCl<sub>3</sub>):  $\delta$  7.21 (d, *J* = 8.6 Hz, 1H), 6.72 (dd, *J* = 8.6 and 2.7 Hz, 1H), 6.63 (d, *J* = 2.6 Hz, 1H), 4.51 (A of AB syst., *J* = 16.4 Hz, 1H), 4.46 (B of AB syst., *J* = 16.4 Hz, 1H), 3.79 (s, 3H), 3.71 (t, *J* = 8.4 Hz, 1H), 2.95-2.80 (m, 2H), 2.36-2.27 (m, 1H), 2.26-2.03 (m, 3H), 1.95-1.84 (m, 1H), 1.80-1.69 (m, 1H), 1.68-1.56 (m, 1H), 1.56-1.20 (m, 6H), 0.85 (s, 3H). <sup>13</sup>C NMR (100 MHz, CDCl<sub>3</sub>):  $\delta$  157.6, 147.6 (dm, *J* = 250.2 Hz), 141.7 (dm, *J* = 256.1 Hz), 138.0, 137.7 (dm, *J* = 248.7 Hz), 132.7, 126.4, 113.9, 111.6, 99.8 (m), 99.3 (app. q, *J* = 3.0 Hz), 88.8, 69.9 (app. q, *J* = 3.4 Hz), 58.0, 55.3, 50.3, 44.0, 43.4, 38.7, 37.7, 29.9, 27.8, 27.3, 27.0, 26.5, 11.8; <sup>19</sup>F NMR (376 MHz, CDCl<sub>3</sub>):  $\delta$  -136.4 (dd, *J* = 20.8 and 6.2 Hz, 2F), -152.8 (t, *J* = 20.7 Hz, 1F), -162.2 (td, *J* = 20.7 and 6.7 Hz, 2F); IR (ATR):  $\nu_{\max}$  2920, 2845, 2240, 1606, 1523, 1498, 1353, 1310, 1237, 1096, 1033, 988, 861, 845, 820, 785 cm<sup>-1</sup>; EIHRMS *m/z* calcd for C<sub>28</sub>H<sub>27</sub>O<sub>2</sub>F<sub>5</sub> [M]<sup>+</sup> 490.1931, found 490.1924.

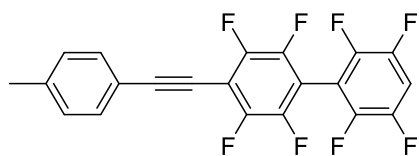**15**

**2,2',3,3',5,5',6,6'-Octafluoro-4-[(4-methylphenyl)ethynyl]-1,1'-biphenyl 15.** Following the general procedure using (*p*-tolylacetylene)copper (90 mg, 0.5 mmol), 2,2',3,3',5,5',6,6'-octafluorobiphenyl (596 mg, 2.0 mmol), <sup>*t*</sup>BuOLi (40 mg, 0.5 mmol) and 1,10-phenanthroline (450 mg, 2.5 mmol) in acetonitrile (8 mL); Yield: 50% (103 mg, 250  $\mu$ mol). Solvent system for flash column chromatography: pentane; White solid; Mp: 160 °C; <sup>1</sup>H NMR (400 MHz, CDCl<sub>3</sub>):  $\delta$  7.52 (d,

$J = 8.0$  Hz, 2H), 7.31-7.20 (obs. m, 1H), 7.22 (d,  $J = 7.9$  Hz, 2H), 2.41 (s, 3H);  $^{13}\text{C}$  NMR (100 MHz,  $\text{CDCl}_3$ ):  $\delta$  146.9 (dm,  $J = 250.7$  Hz), 146.2 (dm,  $J = 253.0$  Hz), 144.1 (dm,  $J = 253.6$  Hz), 140.5, 132.1, 129.5, 118.5, 108.0 (obs. t,  $J = 22$  Hz), 108.0 (m), 107.0 (m), 103.9 (app. t,  $J = 3.2$  Hz), 73.7 (app. t,  $J = 3.8$  Hz), 21.7;  $^{19}\text{F}$  NMR (376 MHz,  $\text{CDCl}_3$ ):  $\delta$  -136.5 (app. q,  $J = 9.9$  Hz, 2F), -138.1 (app. q,  $J = 9.7$  Hz, 2F), -138.3- -138.5 (m, 2F), -139.1- -139.3 (m, 2F); IR (ATR):  $\nu_{\text{max}}$  2922, 2219, 1512, 1478, 1219, 1176, 1077, 992, 929, 817, 702  $\text{cm}^{-1}$ ; EIHRMS  $m/z$  calcd for  $\text{C}_{21}\text{H}_8\text{F}_8$   $[\text{M}]^+$  412.0498, found 412.0501.

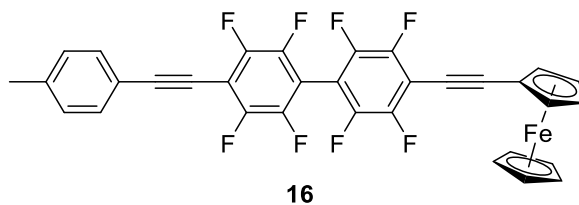

**2,2',3,3',5,5',6,6'-Octafluoro-4-[(4-methylphenyl)ethynyl]-4'-(ferrocenylethynyl)-1,1'-biphenyl**

**16.** Following the general procedure using (ferrocenylethynyl)copper (139  $\mu\text{mol}$ ), 2,2',3,3',5,5',6,6'-octafluoro-4-[(4-methylphenyl)ethynyl]-1,1'-biphenyl **18** (208  $\mu\text{mol}$ ),  $t\text{BuOLi}$  (139  $\mu\text{mol}$ ) and 1,10-phenanthroline (695  $\mu\text{mol}$ ) in DMF (1 mL); Yield: 58% (50 mg, 81  $\mu\text{mol}$ ). Solvent system for flash column chromatography: cyclohexane/EtOAc: 80/20; Orange solid; Mp: 189  $^{\circ}\text{C}$ ;  $^1\text{H}$  NMR (400 MHz,  $\text{CDCl}_3$ ):  $\delta$  7.52 (d,  $J = 8.0$  Hz, 2H), 7.22 (d,  $J = 7.9$  Hz, 2H), 4.62 (app. t,  $J = 1.8$  Hz, 2H), 4.35 (app. t,  $J = 1.8$  Hz, 2H), 4.29 (s, 5H), 2.41 (s, 3H);  $^{13}\text{C}$  NMR (100 MHz,  $\text{CDCl}_3$ ):  $\delta$  145.9 (dm,  $J = 251.4$  Hz), 143.2 (dm,  $J = 252.2$  Hz), 139.5, 131.1, 128.5, 117.5, 106.7 (m), 106.0 (m), 105.1 (m), 103.4 (app. t,  $J = 2.9$  Hz), 103.0 (app. t,  $J = 3.2$  Hz), 72.8 (app. t,  $J = 3.8$  Hz), 71.2, 69.5 (2C), 69.0, 61.7, 20.8;  $^{19}\text{F}$  NMR (376 MHz,  $\text{CDCl}_3$ ):  $\delta$  -136.5 (app. q,  $J = 10.0$  Hz, 2F), -137.0 (app. q,  $J = 10.3$  Hz, 2F), -139.0 (app. sext,  $J = 10.0$  Hz, 2F), -139.2 (app. sext.,  $J = 9.9$  Hz, 2F); IR (ATR):  $\nu_{\text{max}}$  2954, 2221, 1649, 1468, 1223, 1109, 999, 968, 818, 760, 728, 704  $\text{cm}^{-1}$ ; EIHRMS  $m/z$  calcd for  $\text{C}_{33}\text{H}_{16}\text{F}_8\text{Fe}$   $[\text{M}]^+$  620.0474, found 620.0476.

## *Supporting Information*

### **$^1\text{H}$ and $^{13}\text{C}$ NMR spectra**

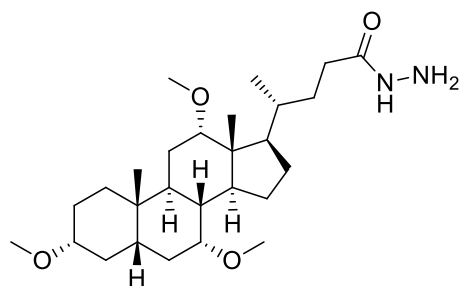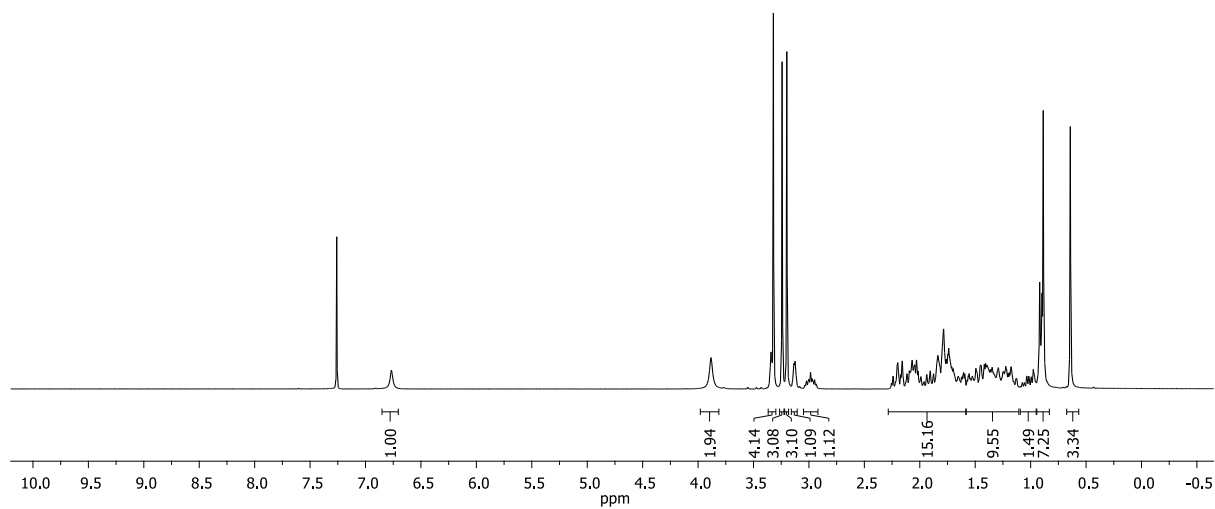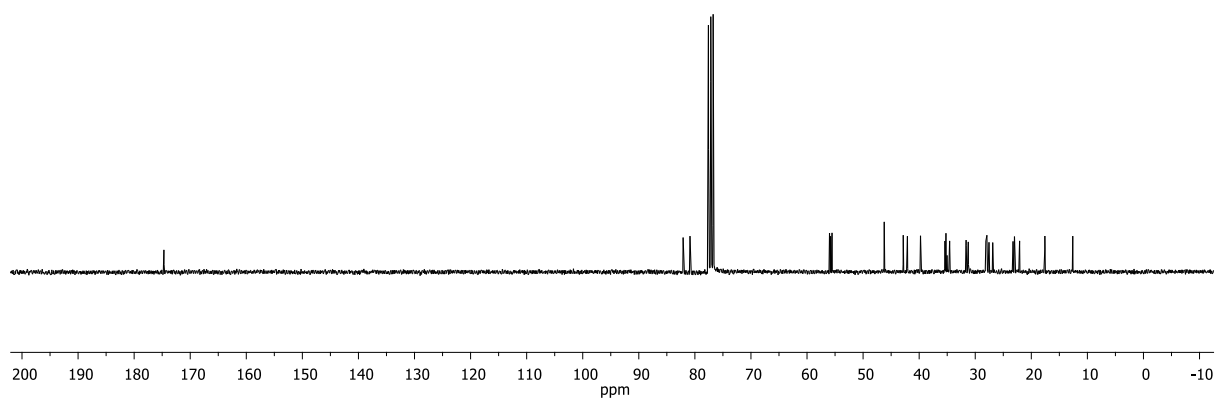

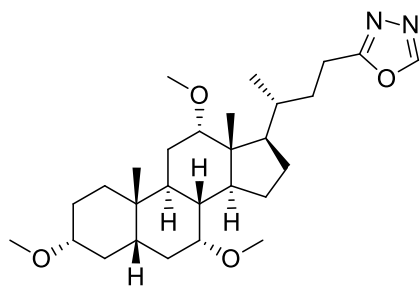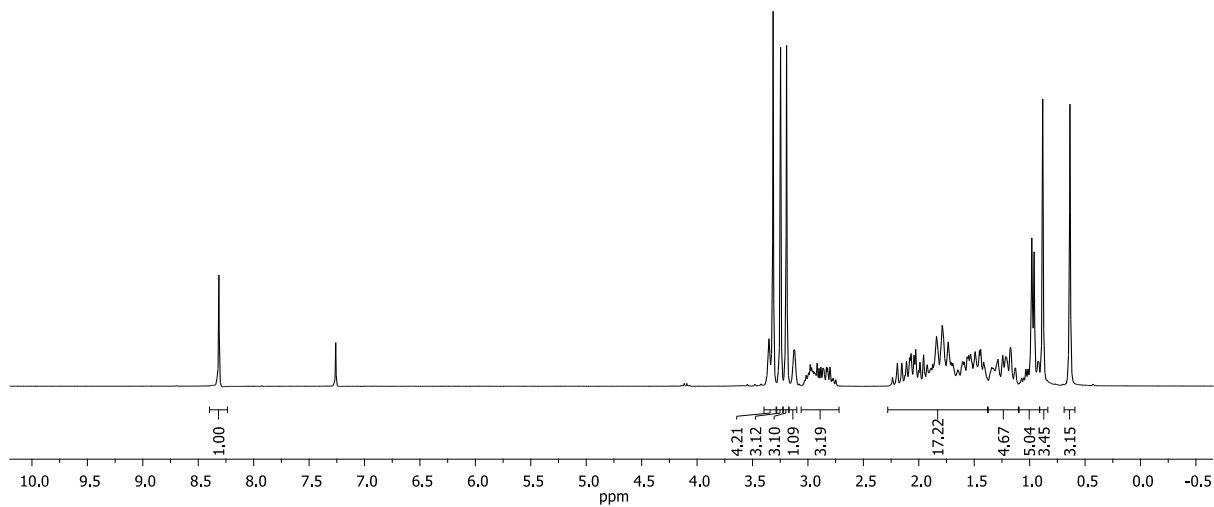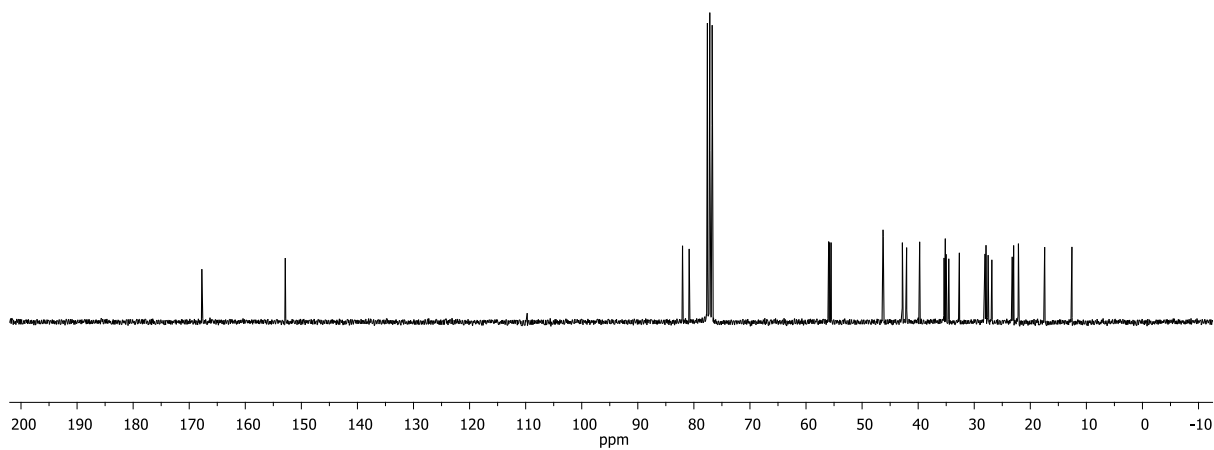

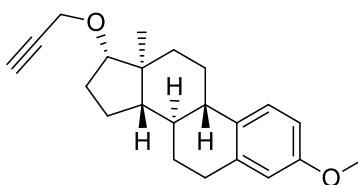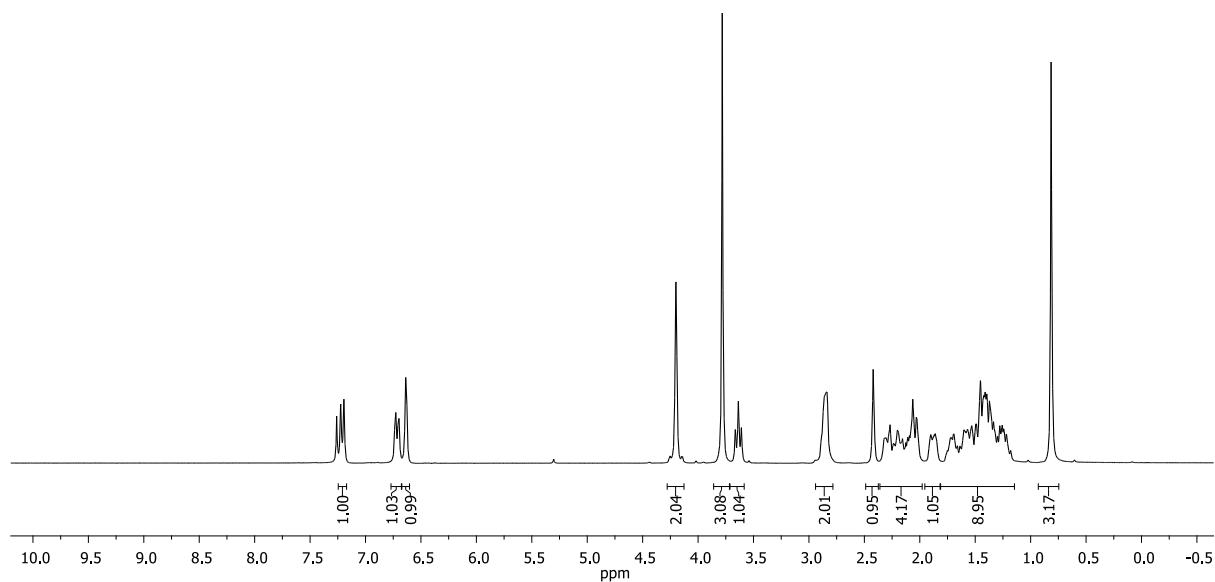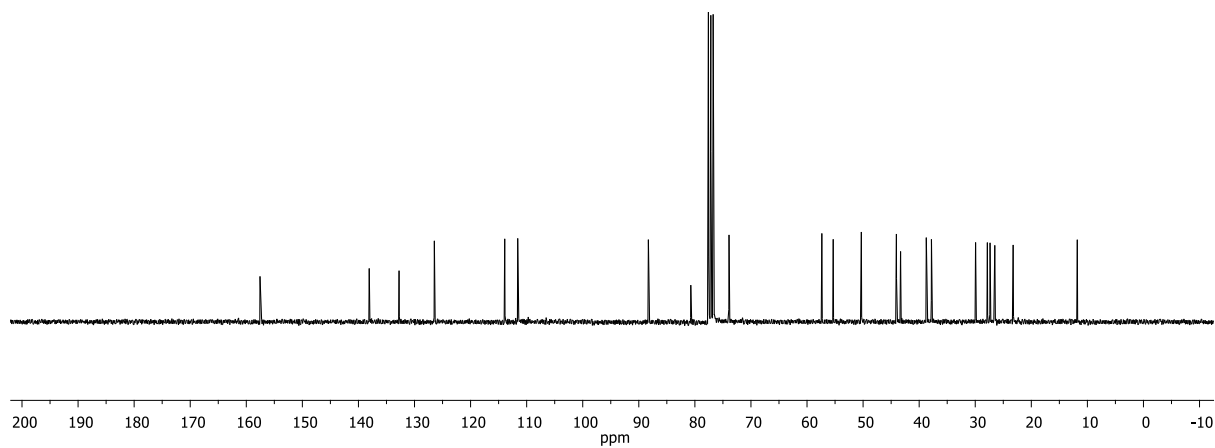

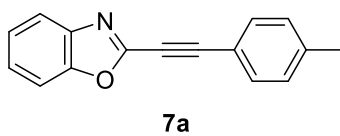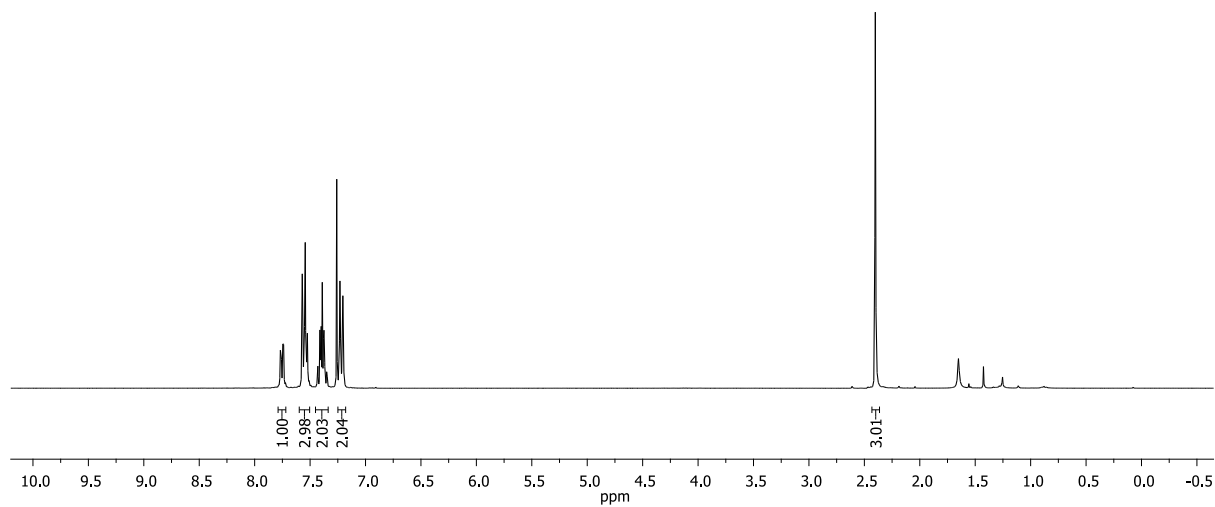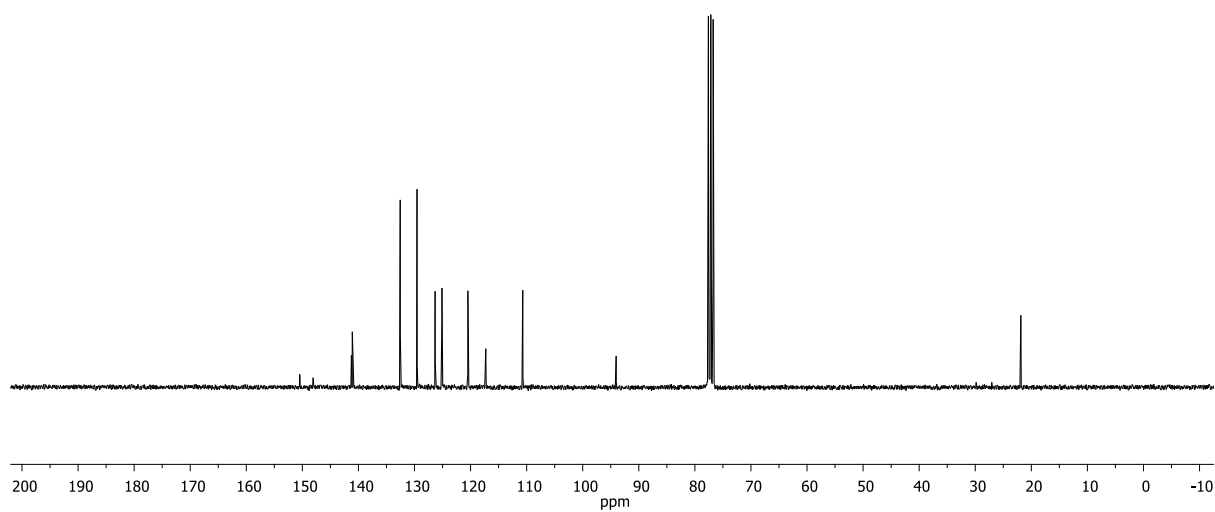

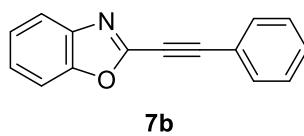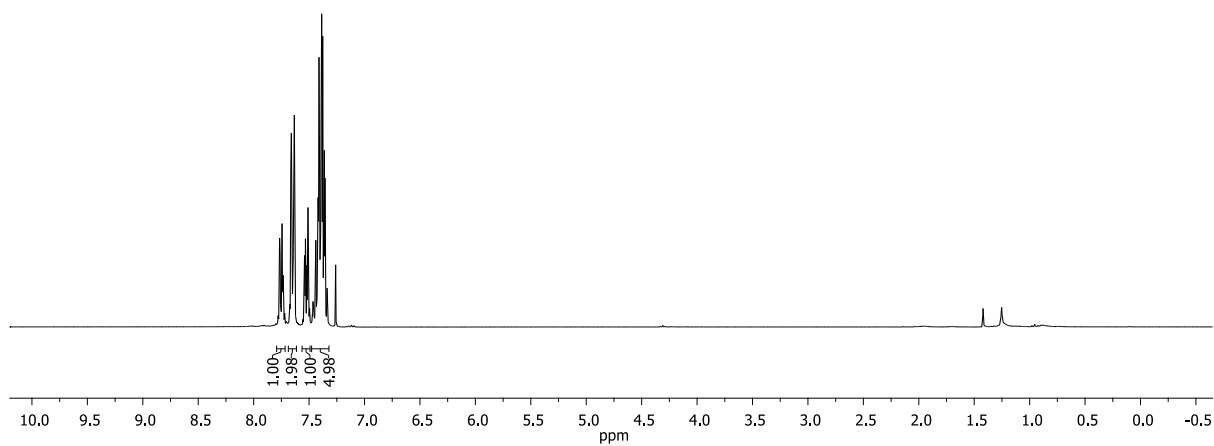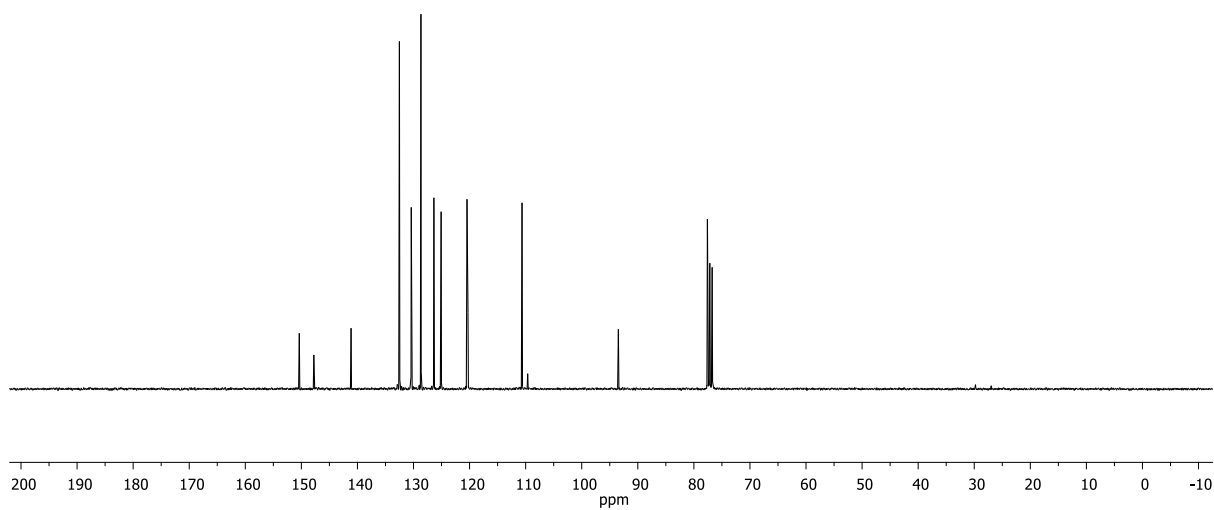

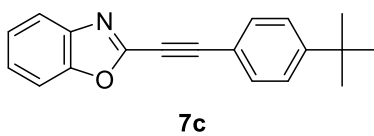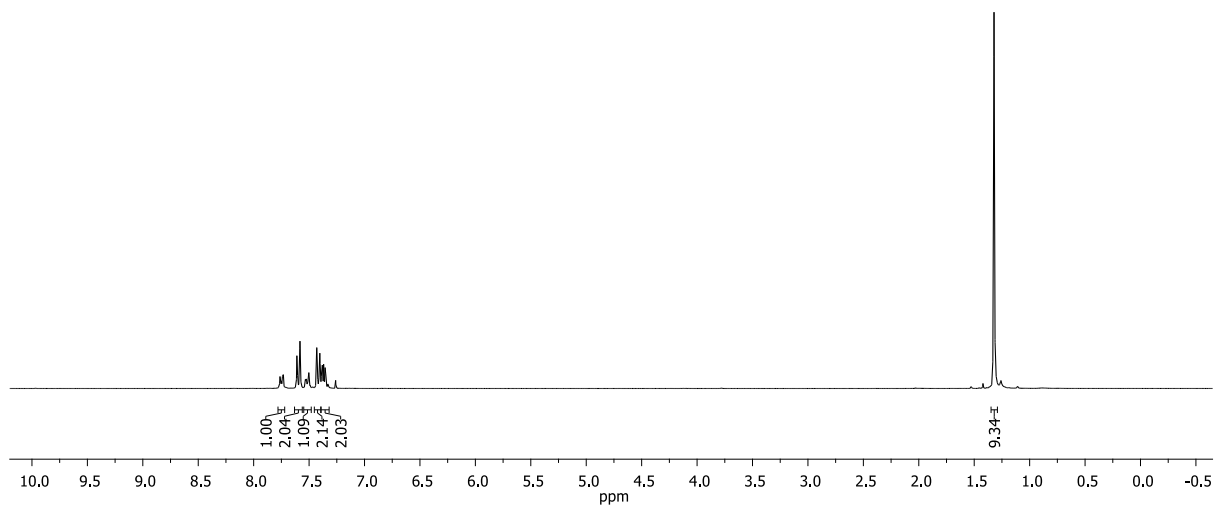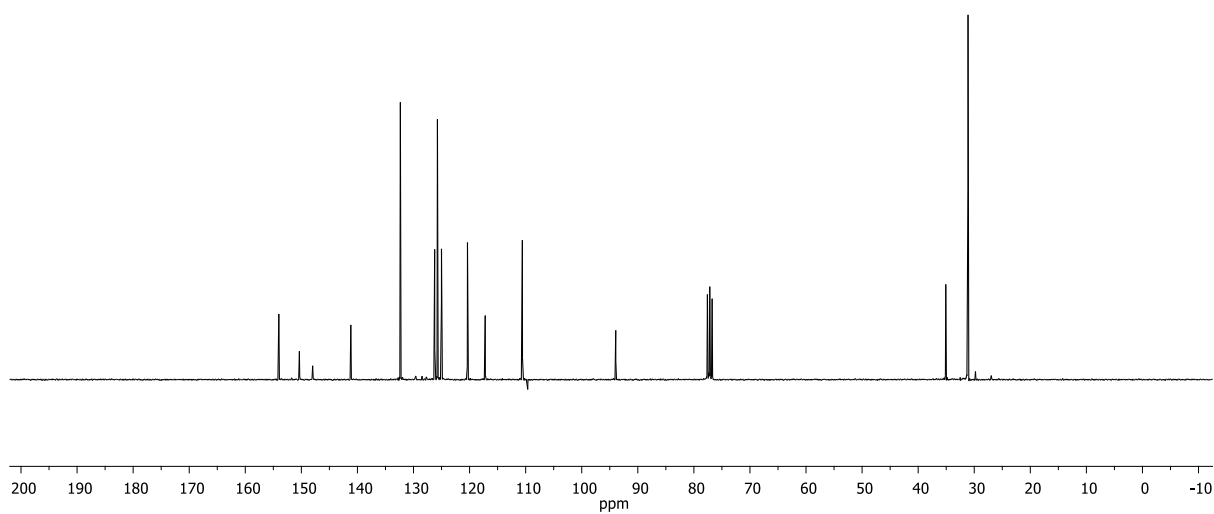

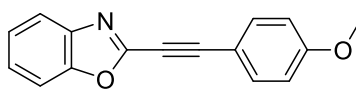

**7d**

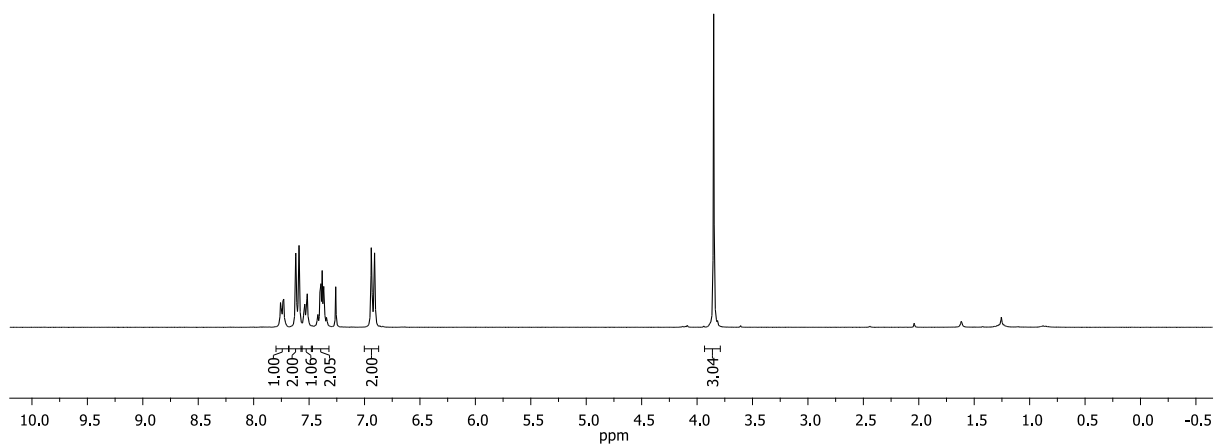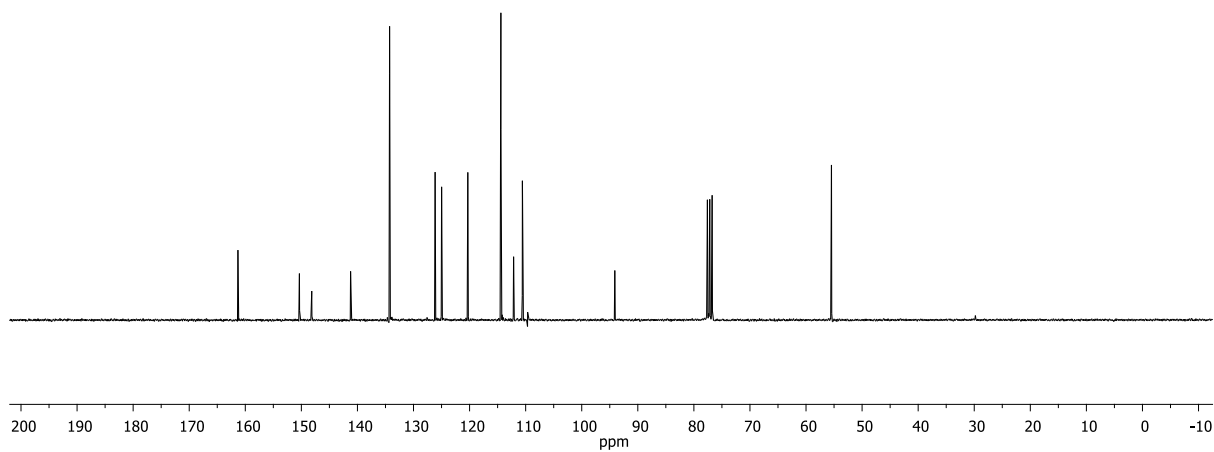

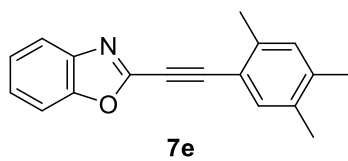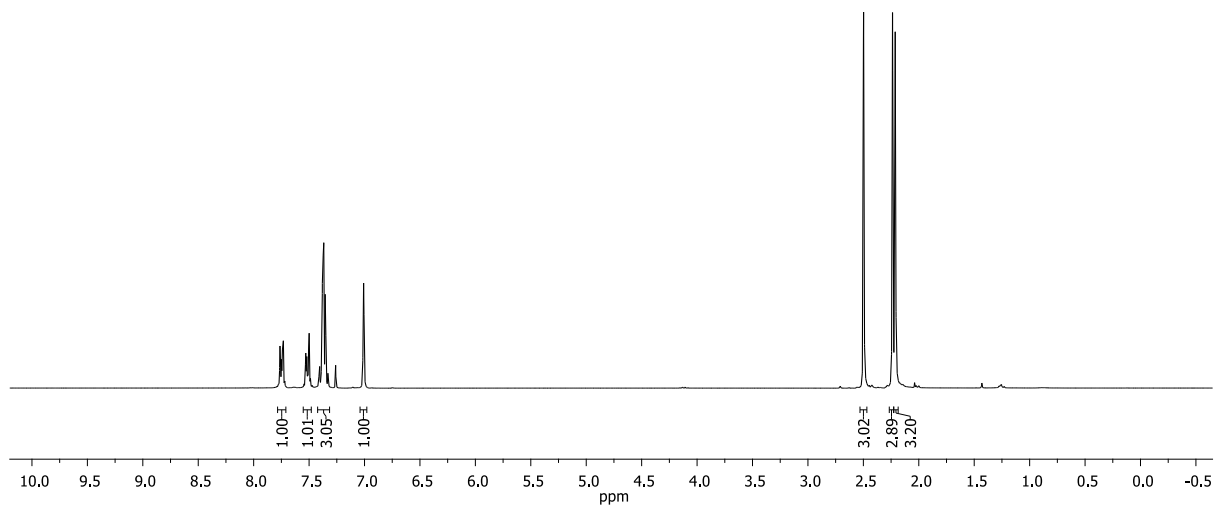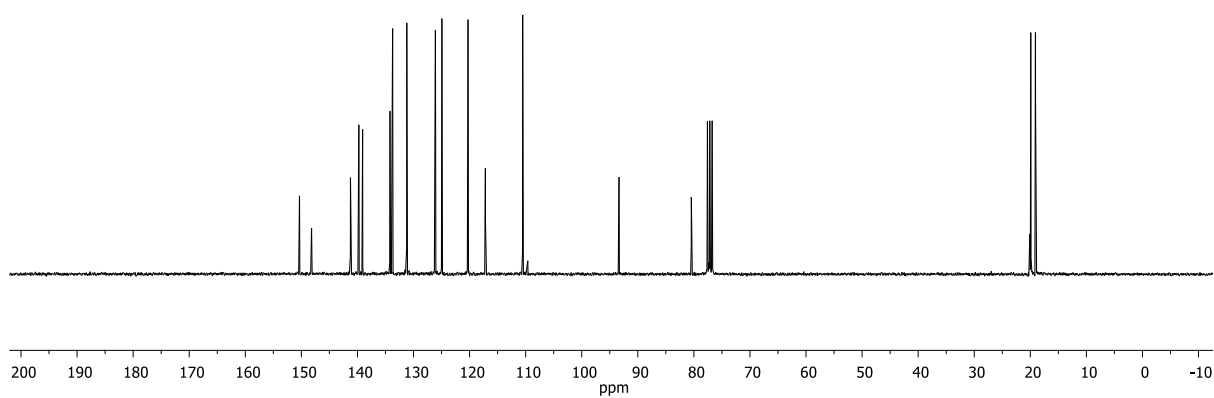

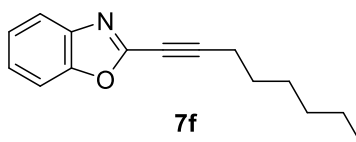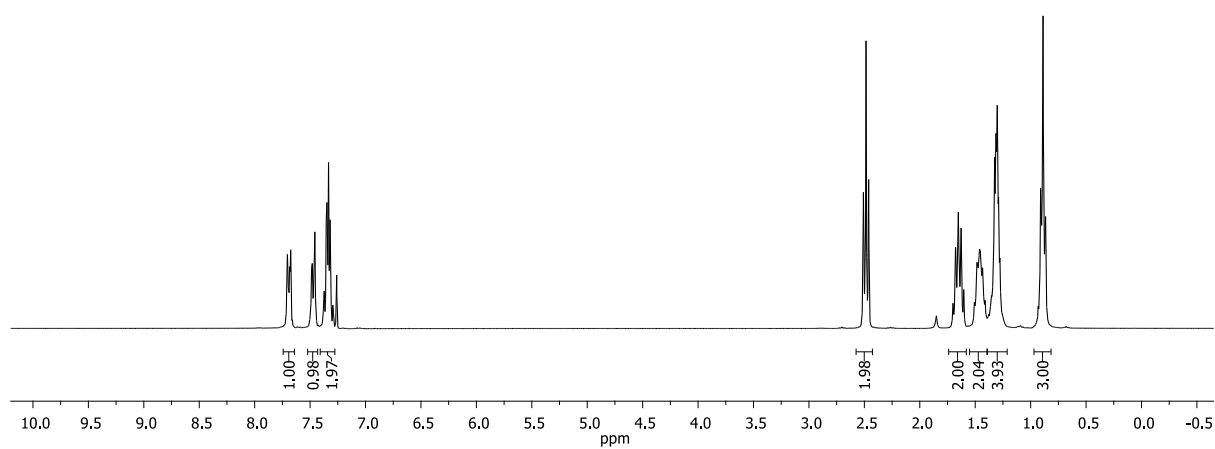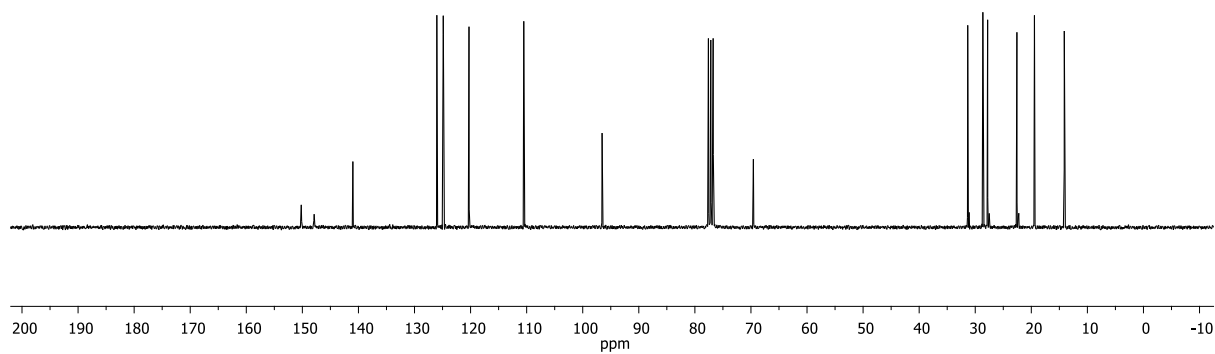

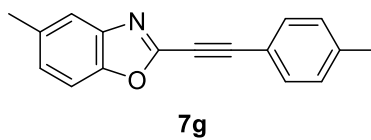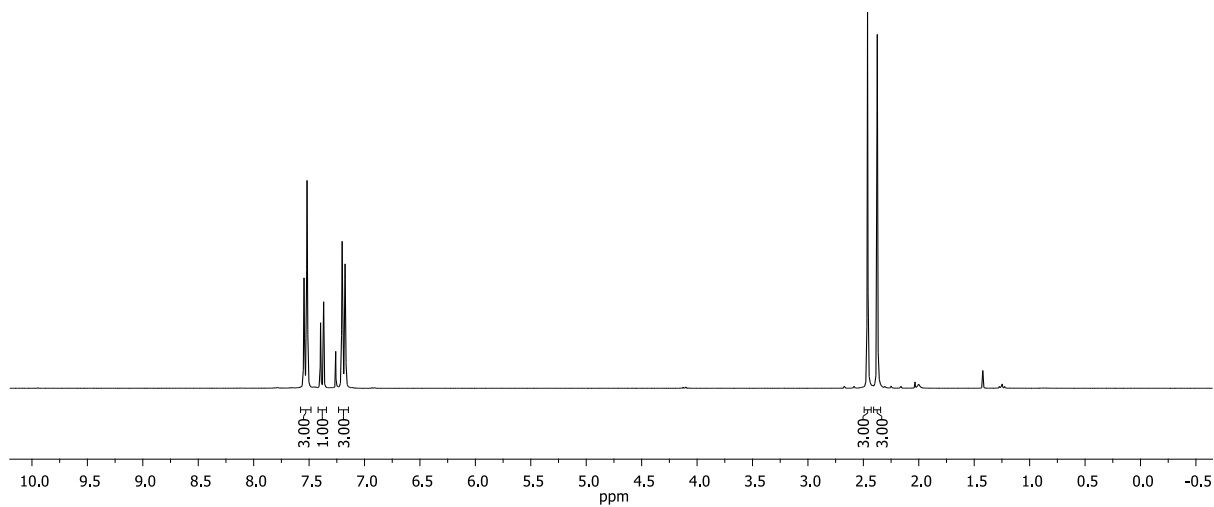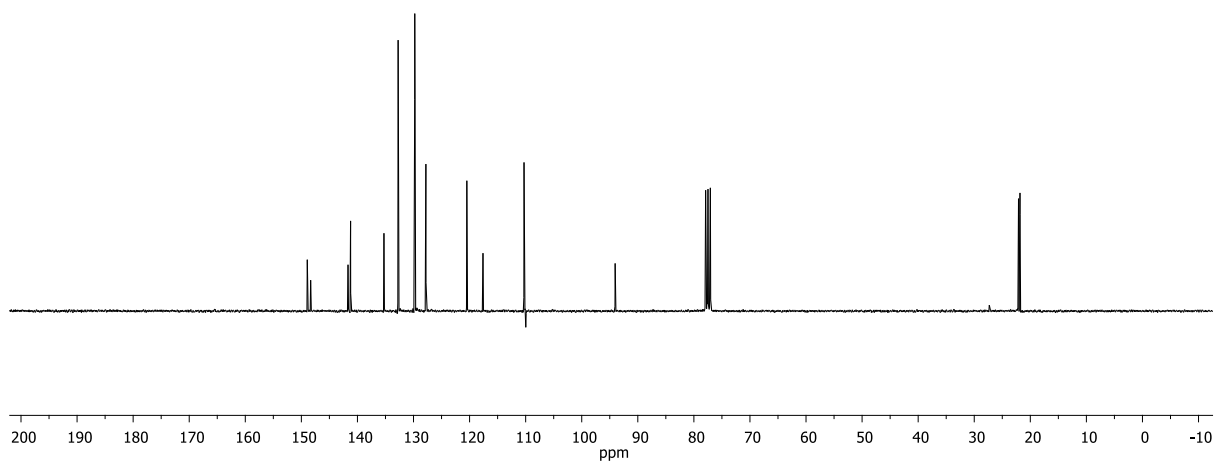

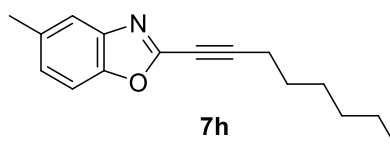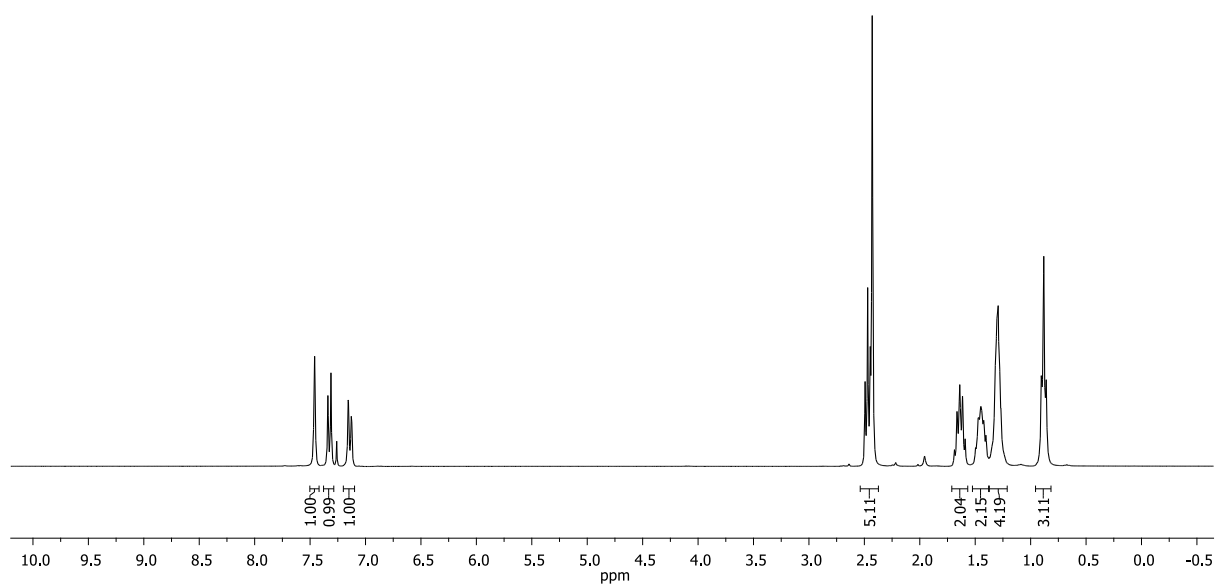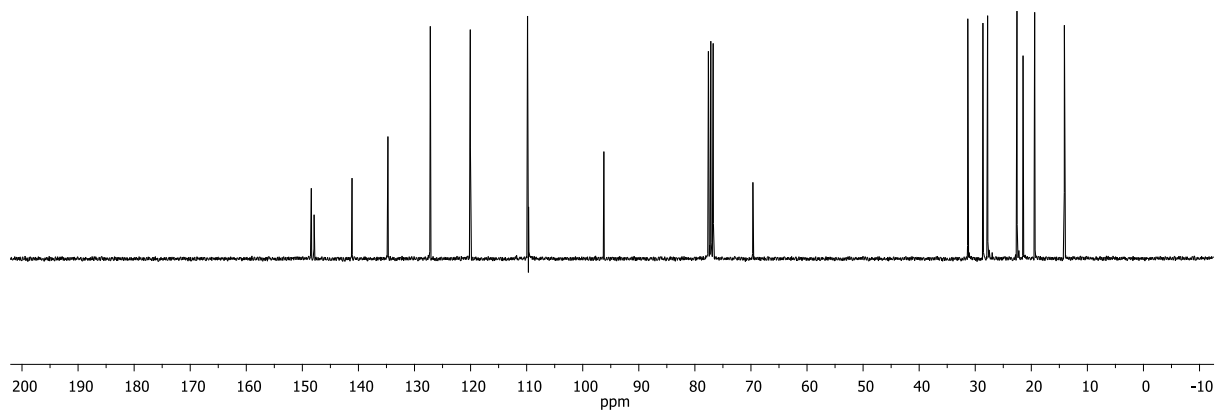

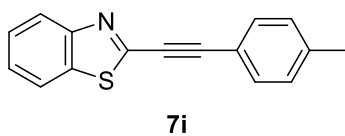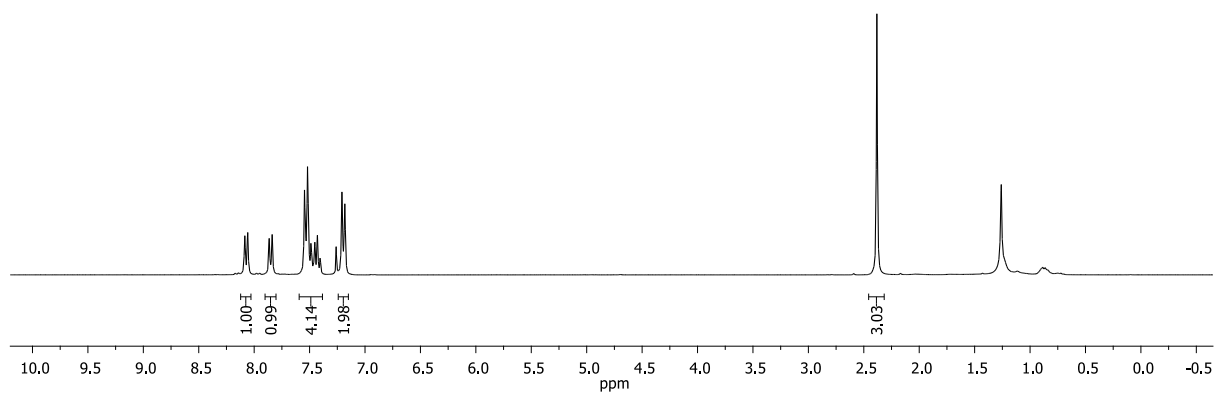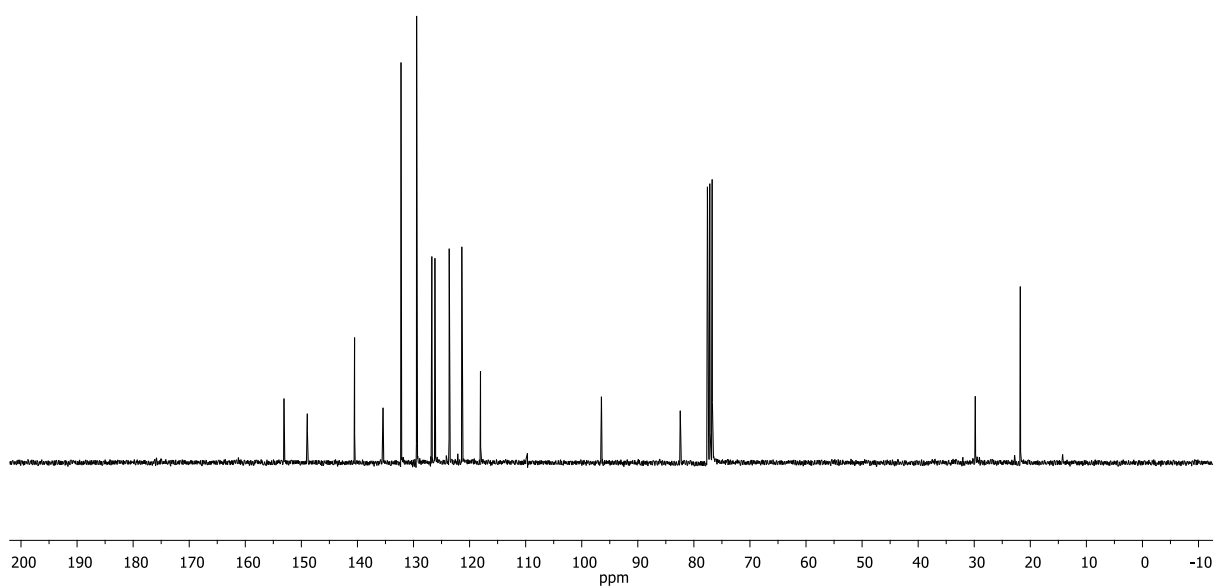

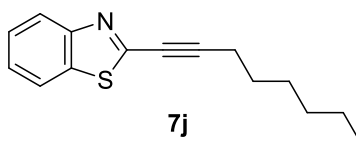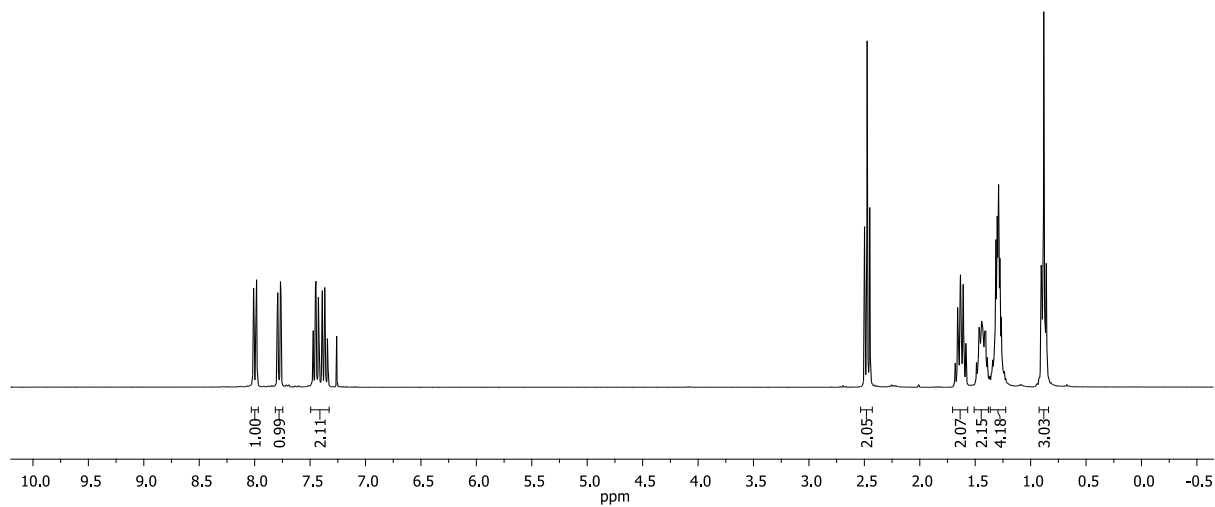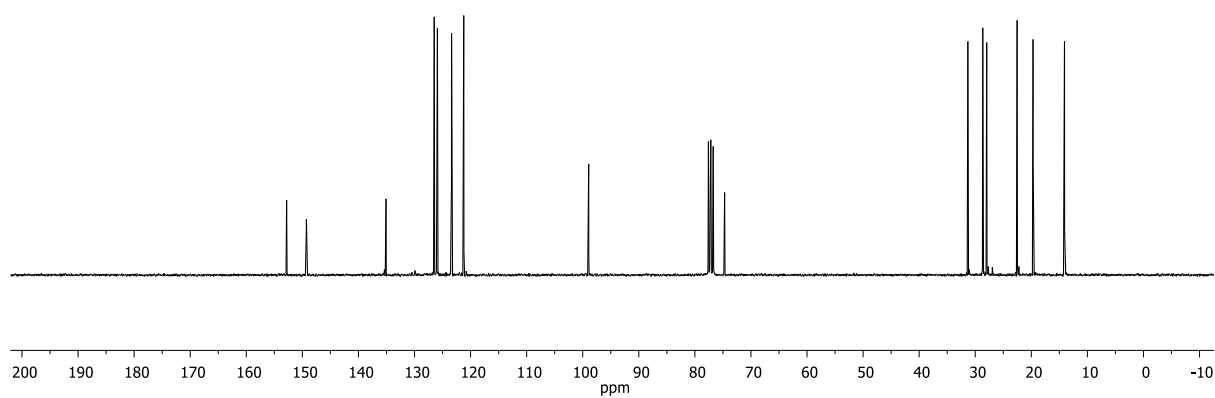

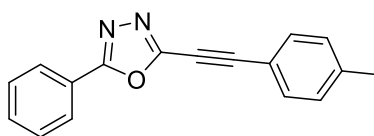

9a

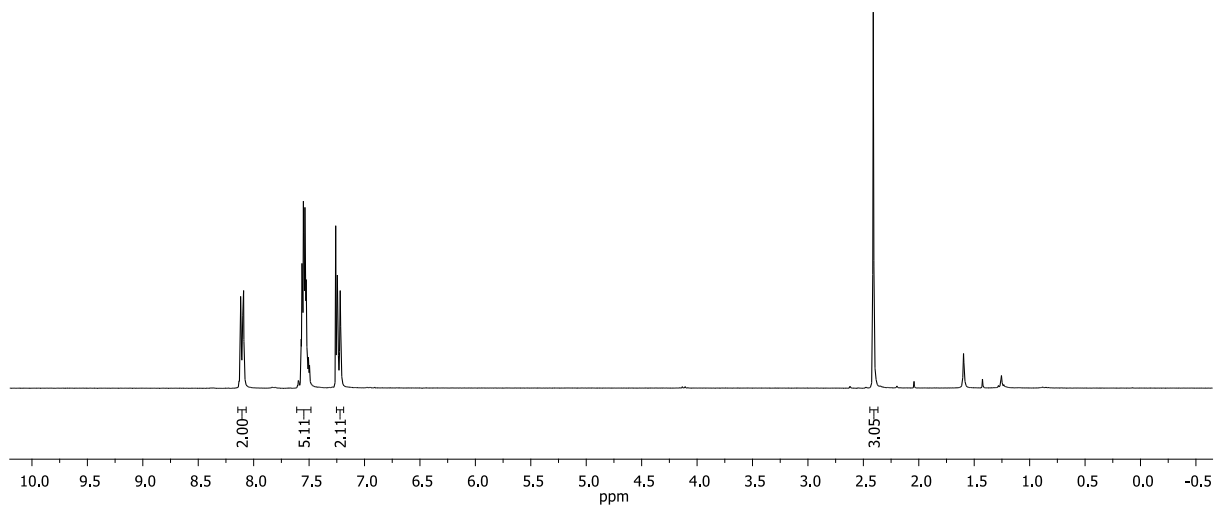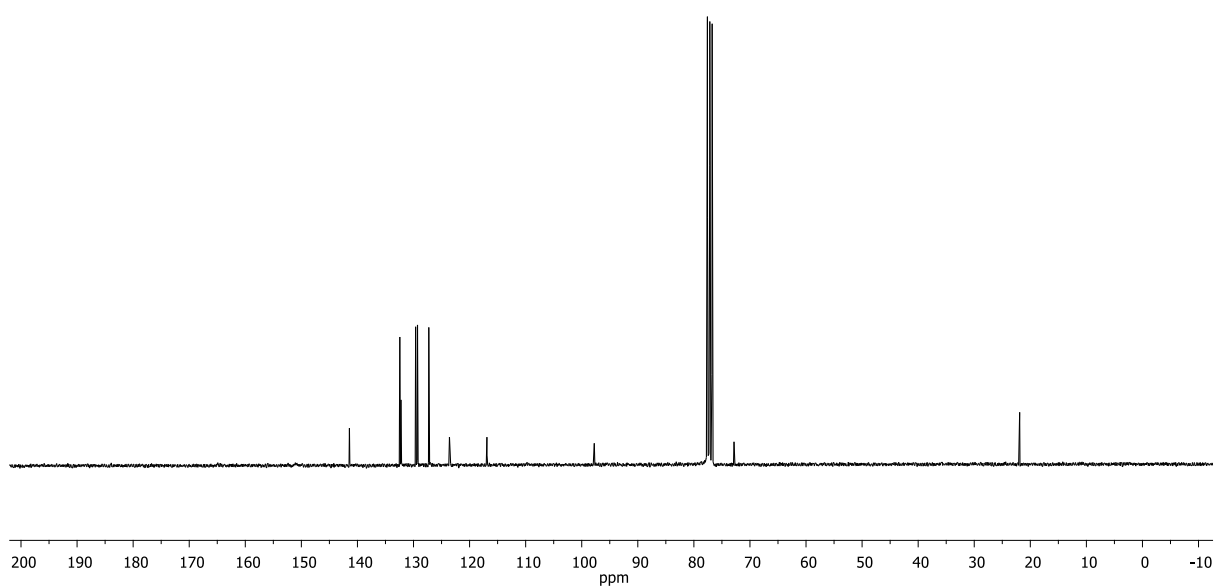

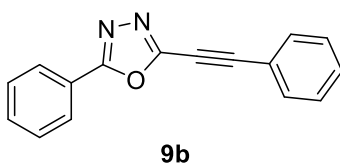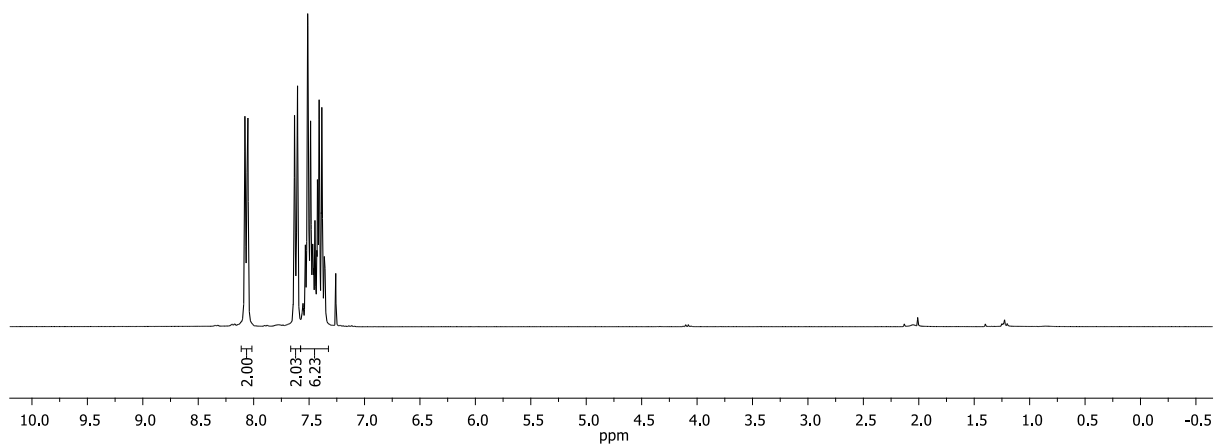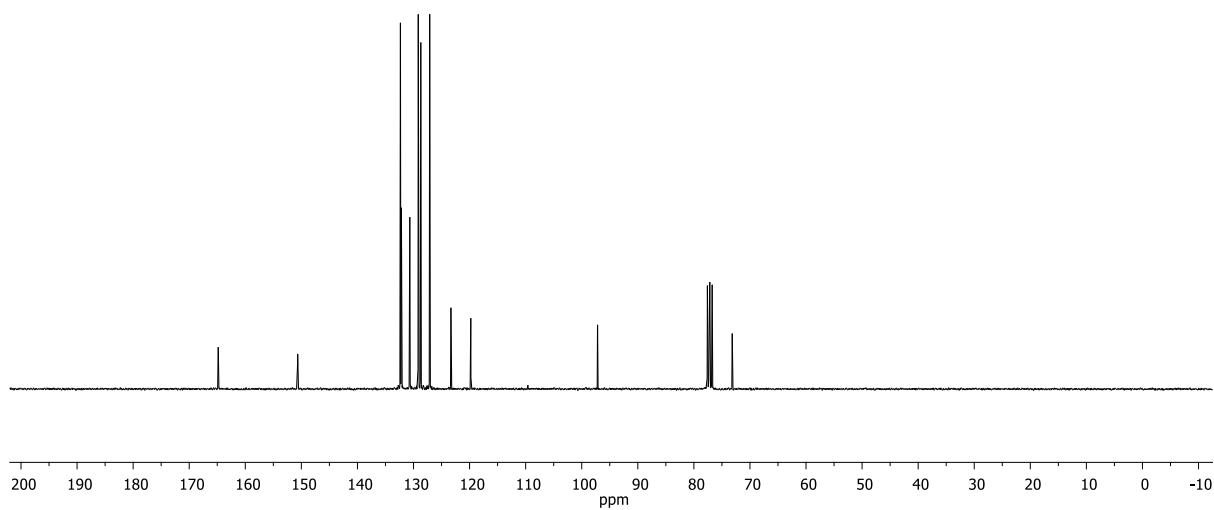

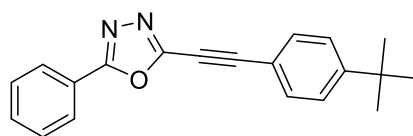

**9c**

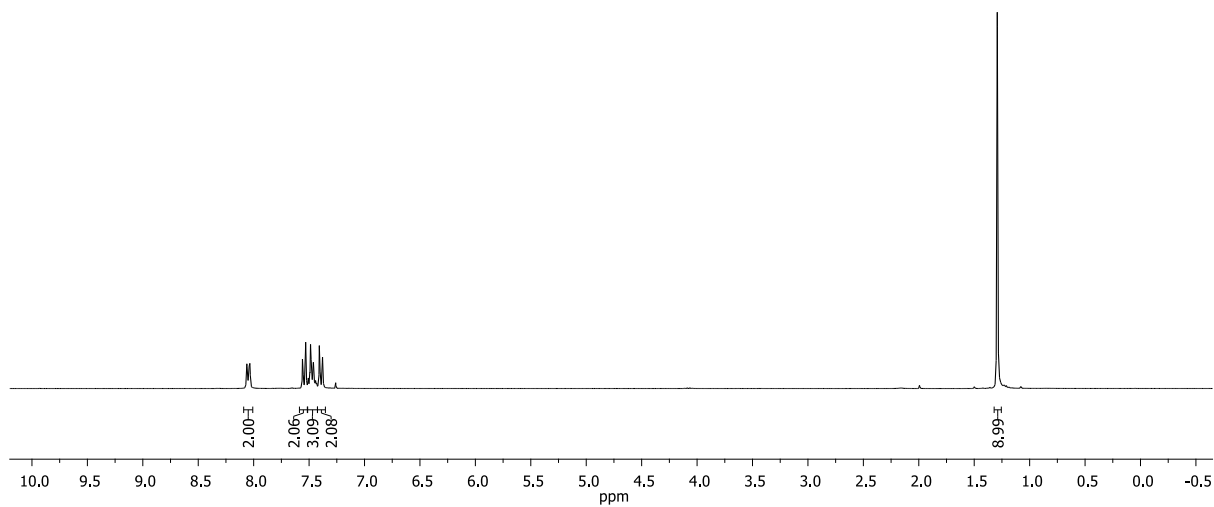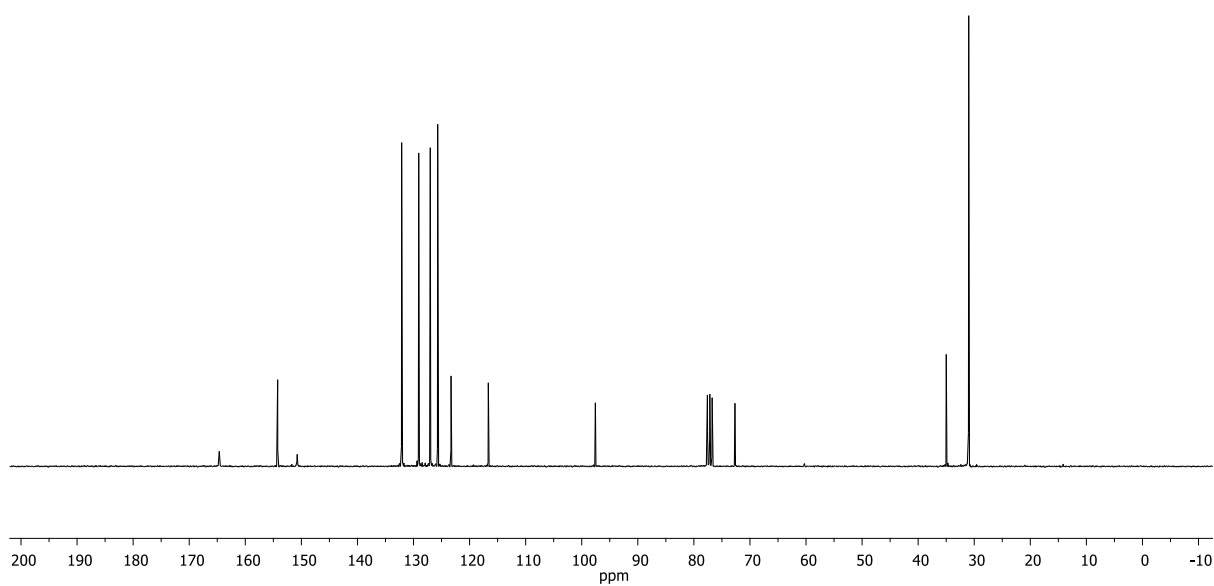

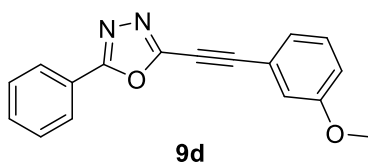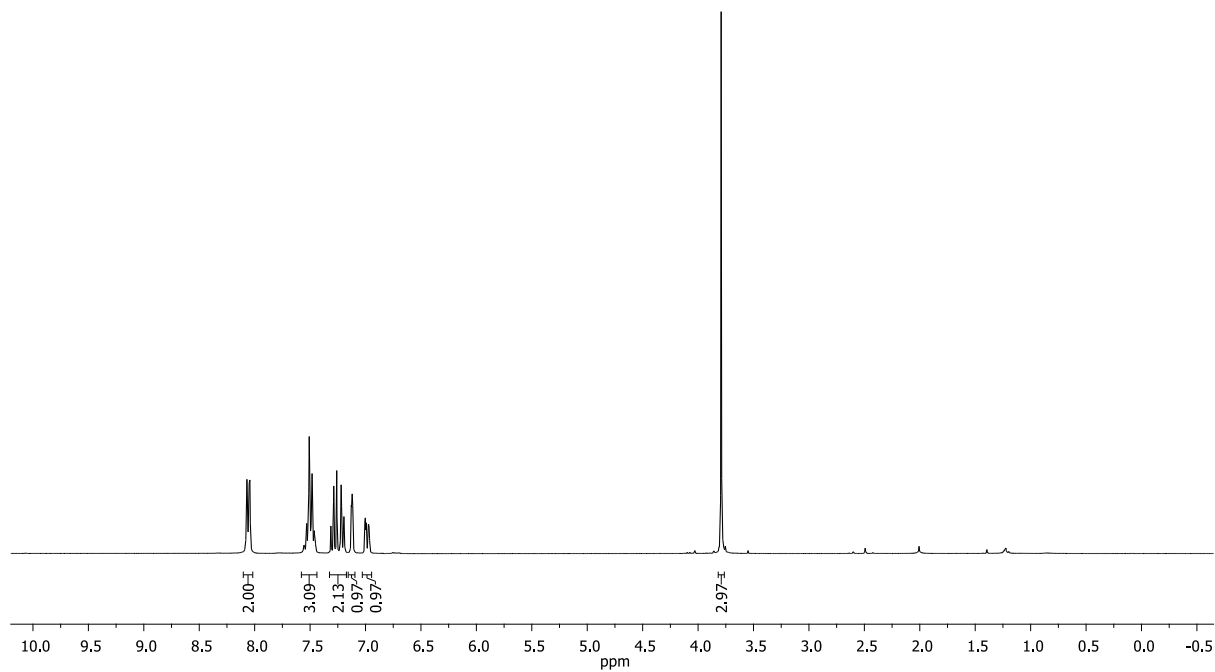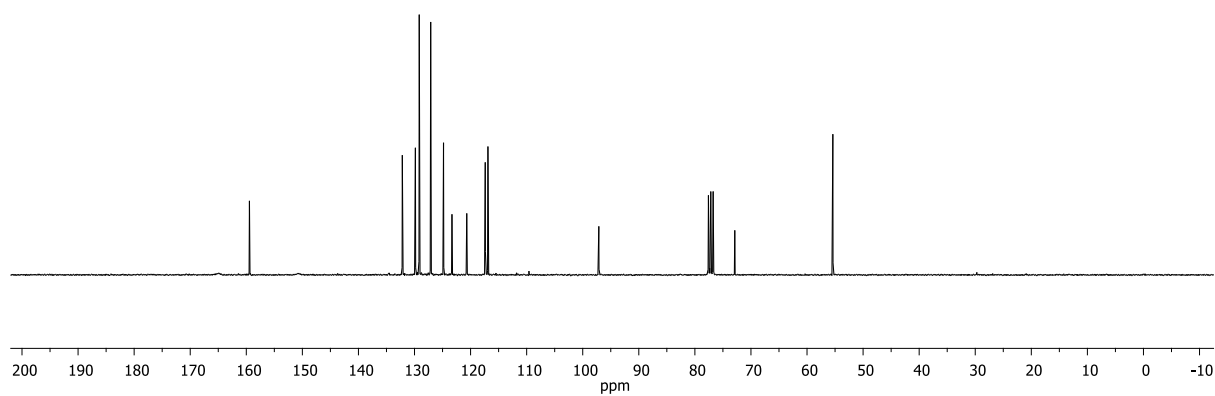

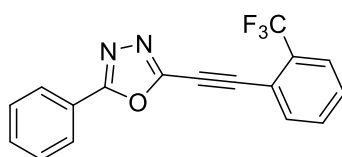

**9e**

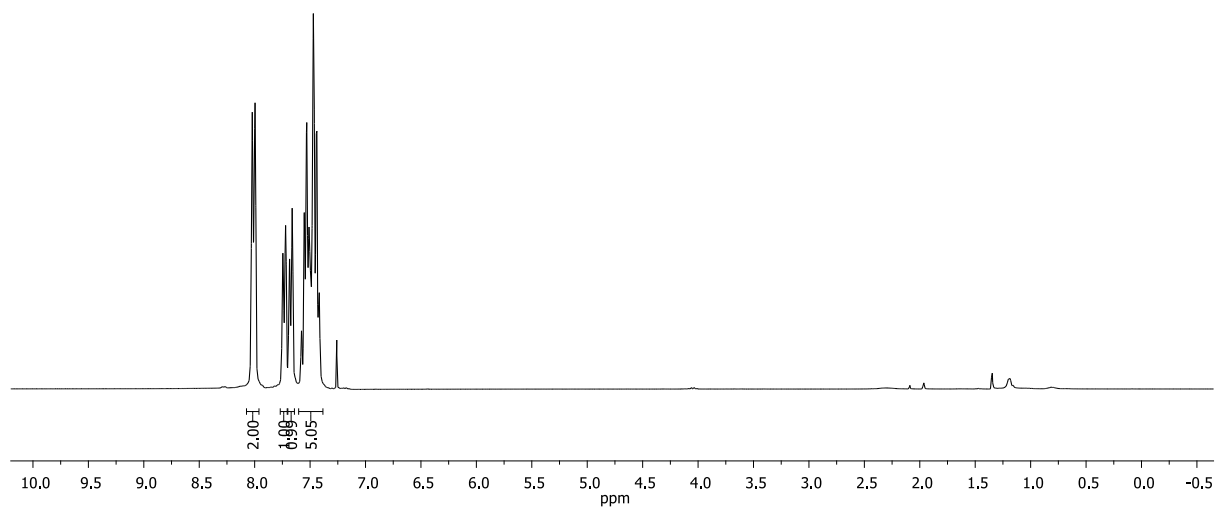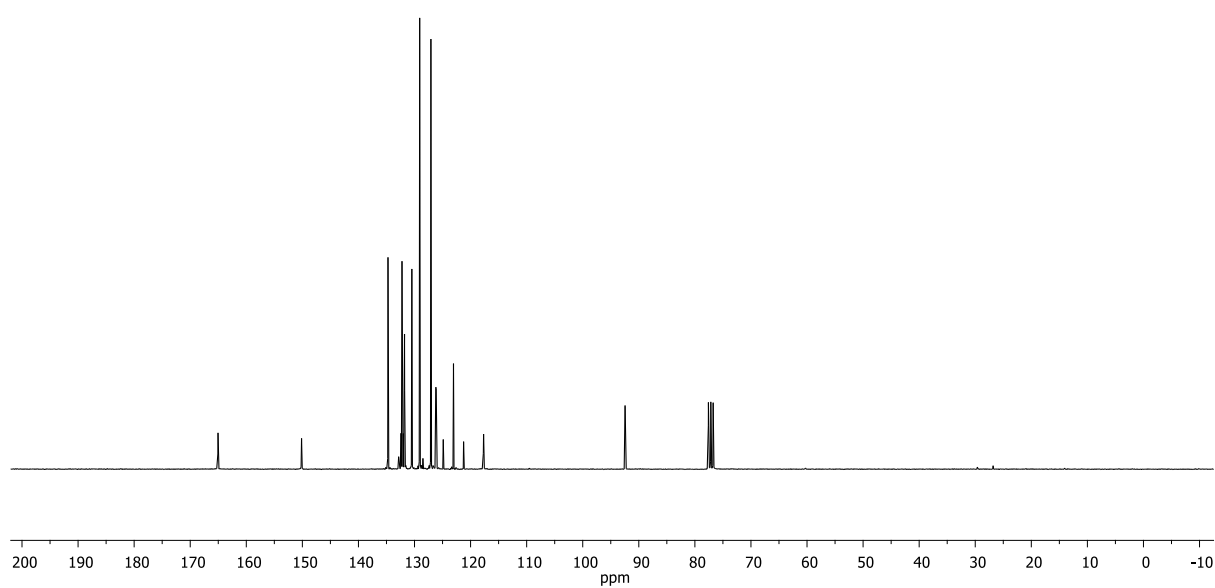

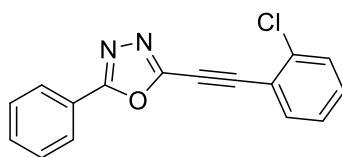

**9f**

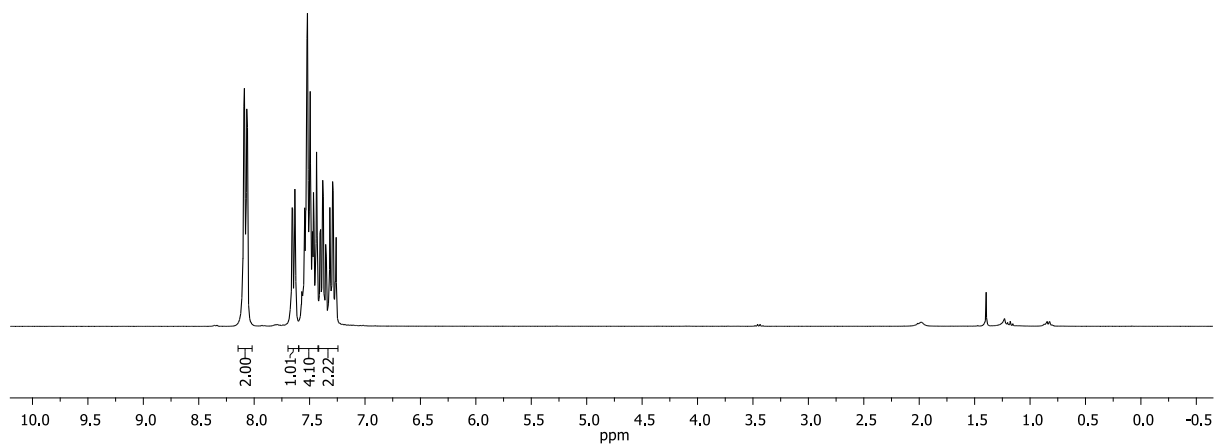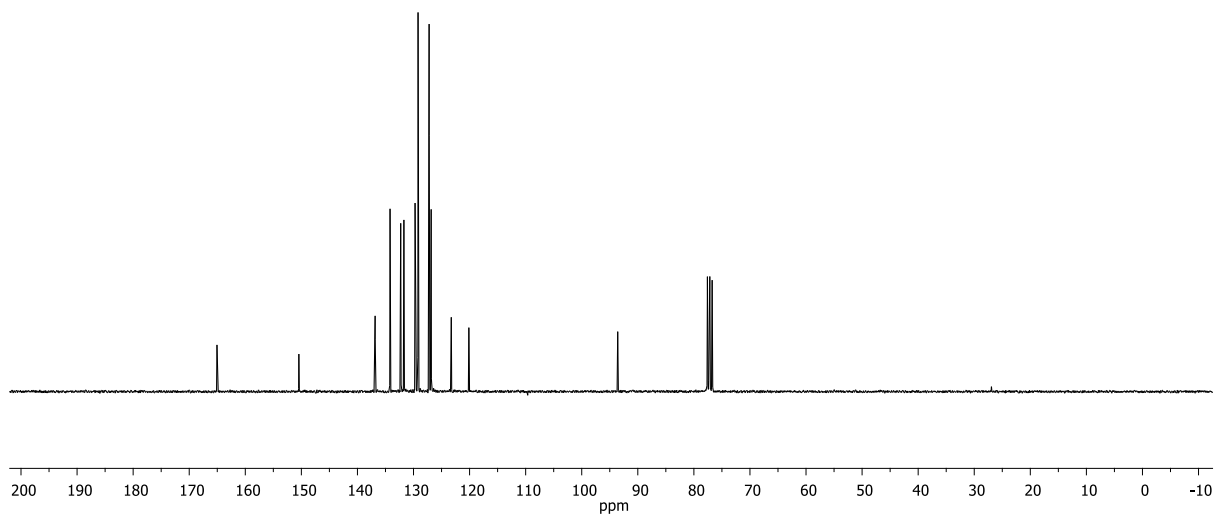

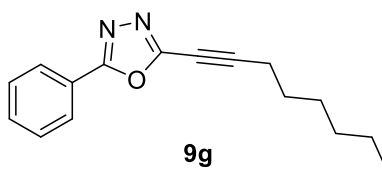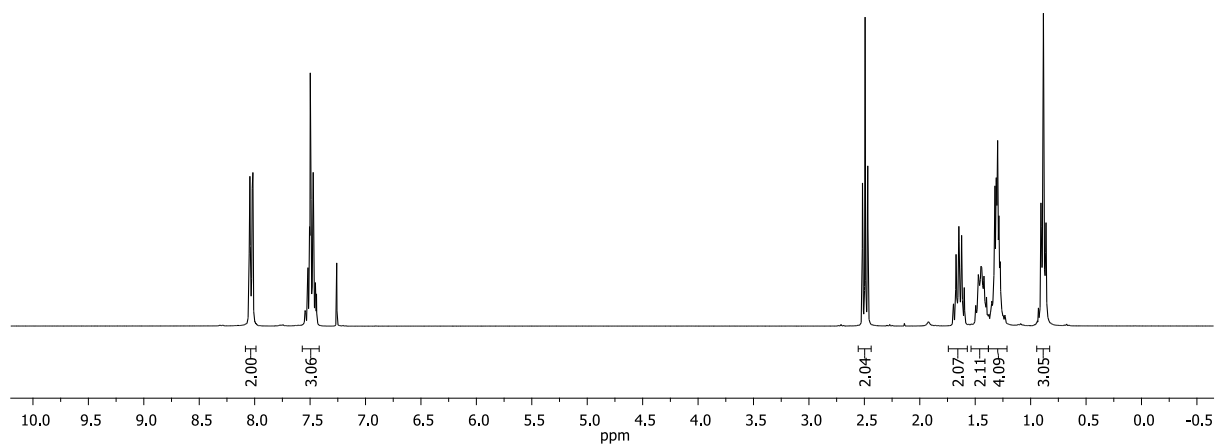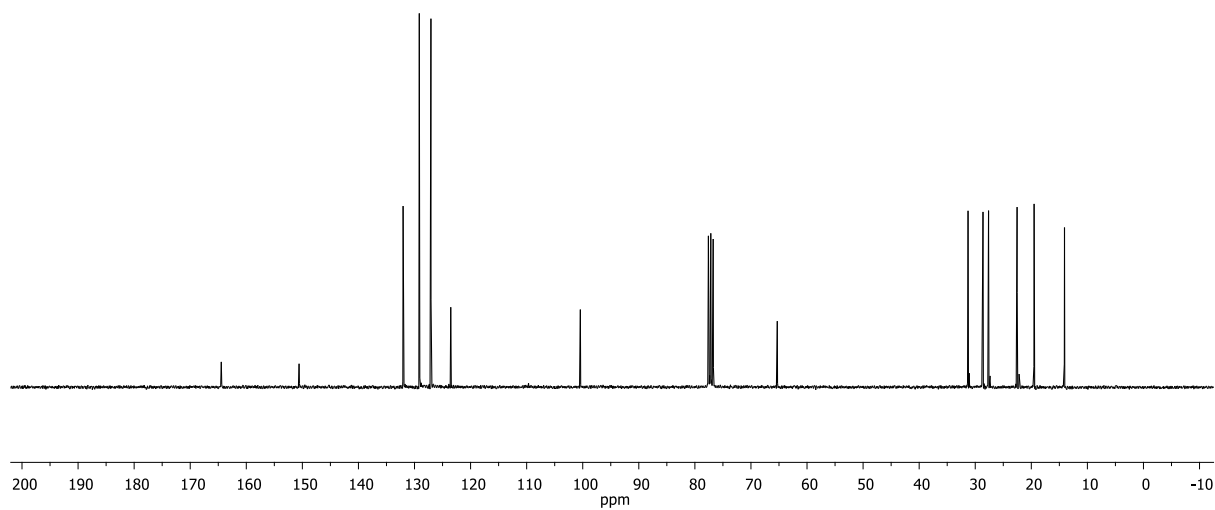

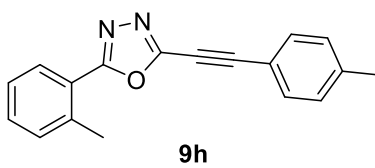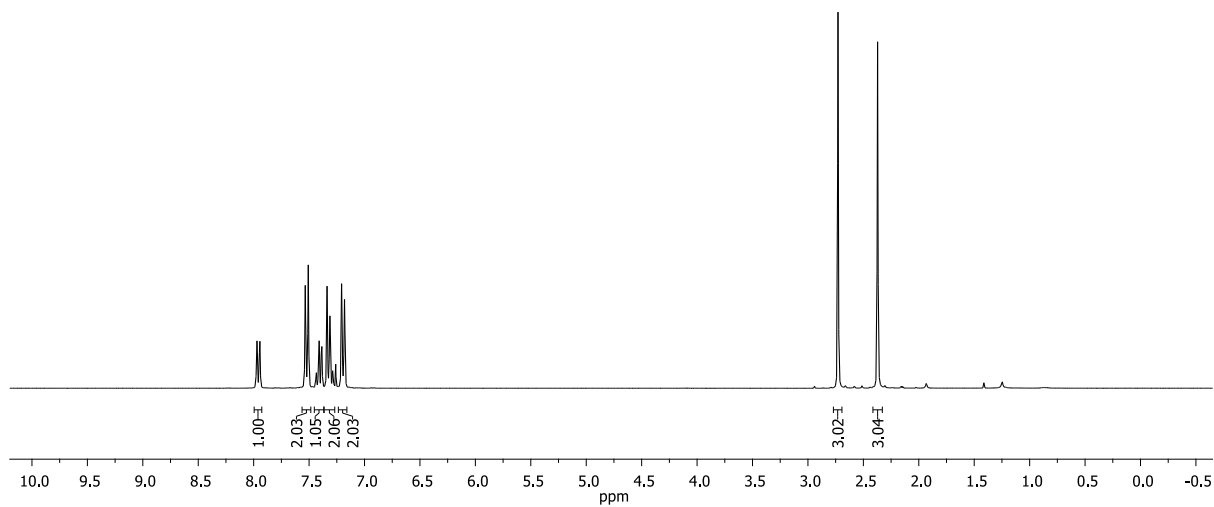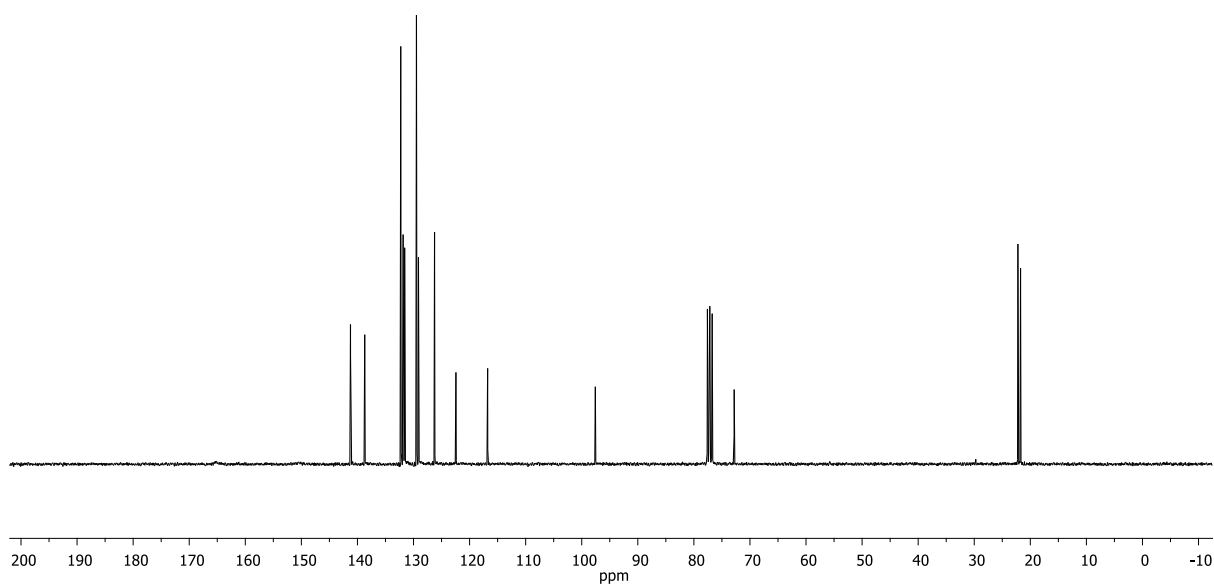

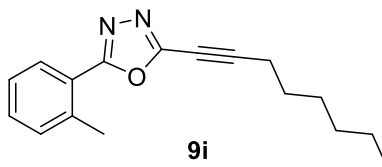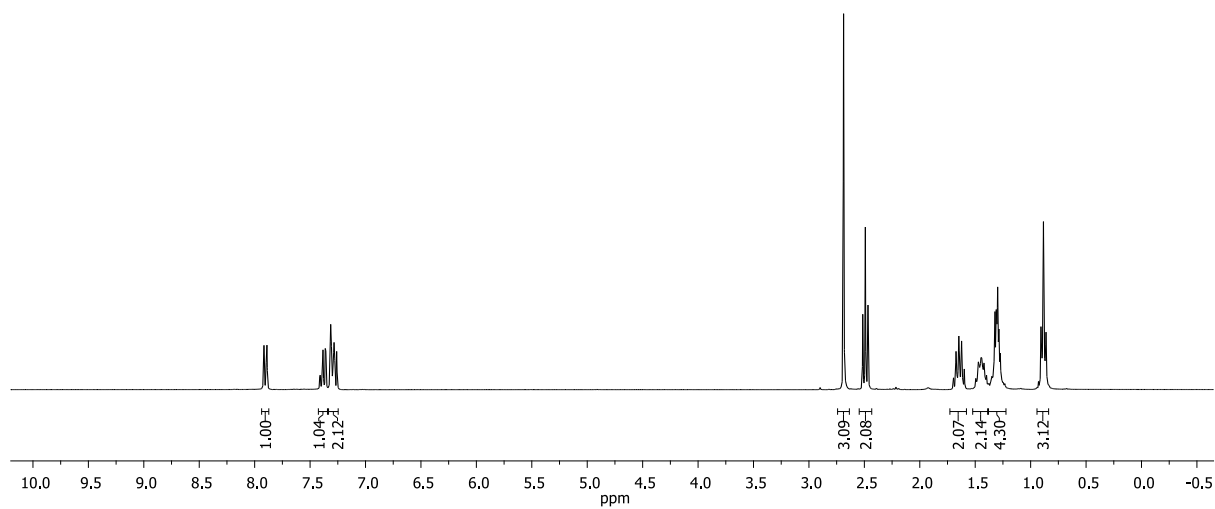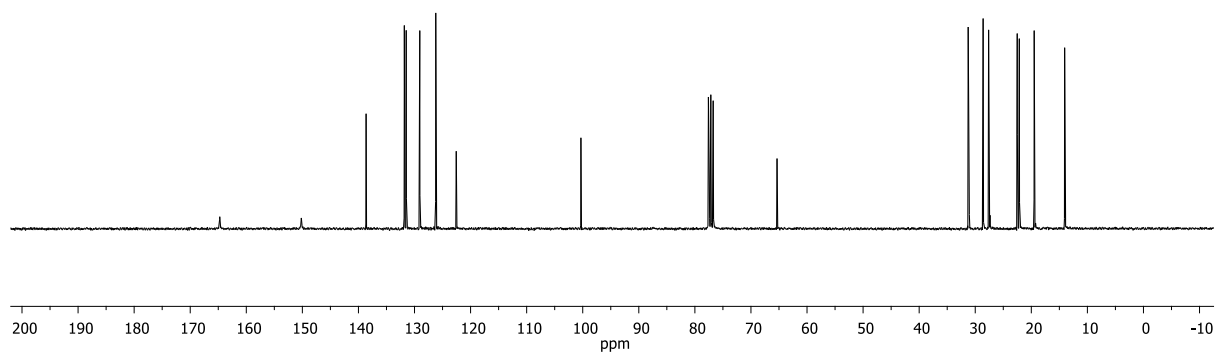

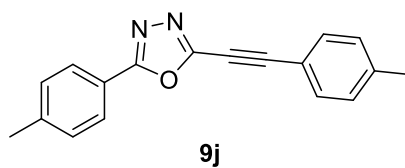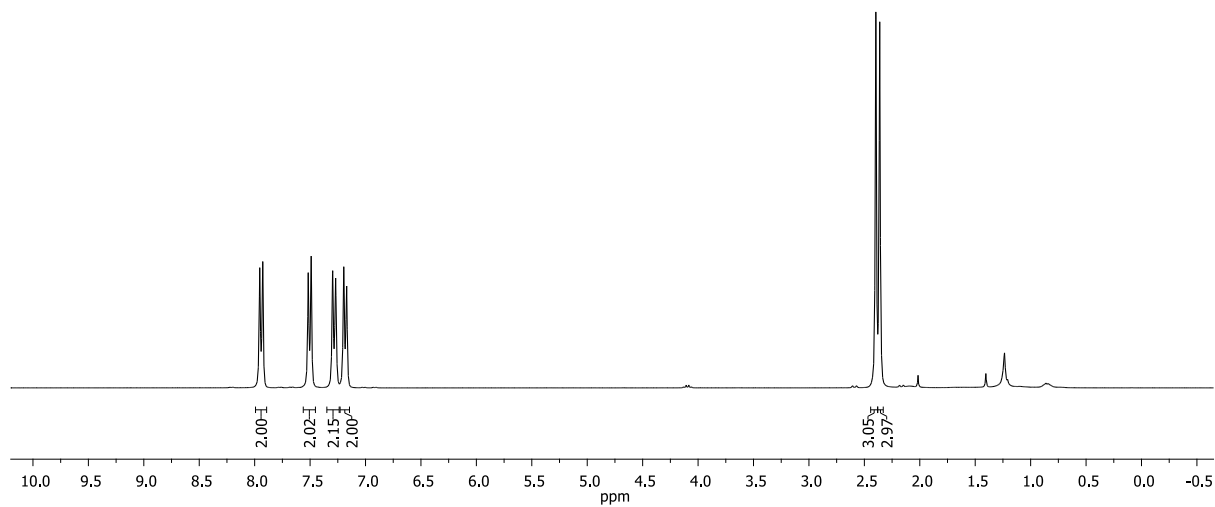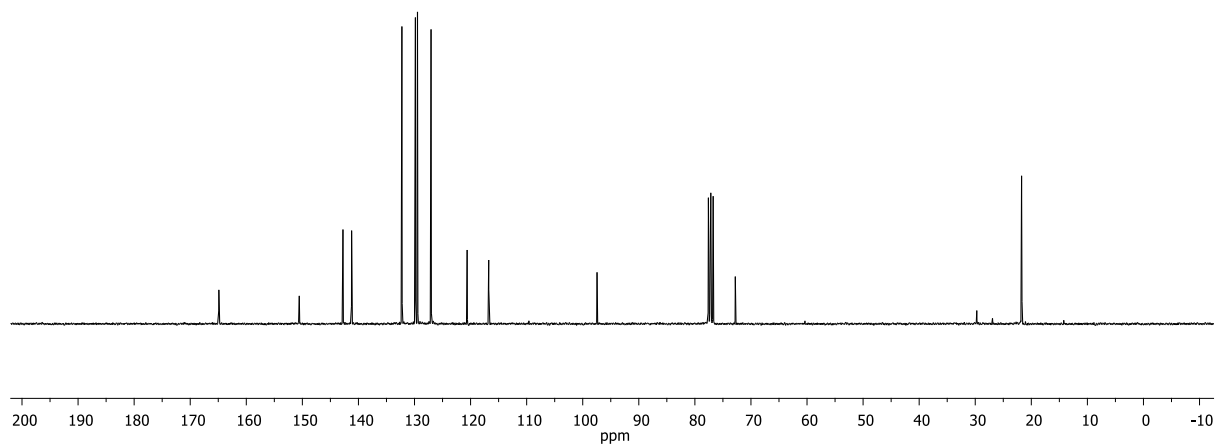

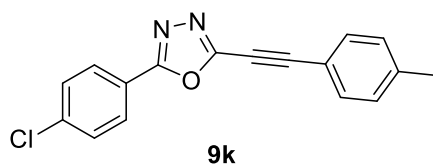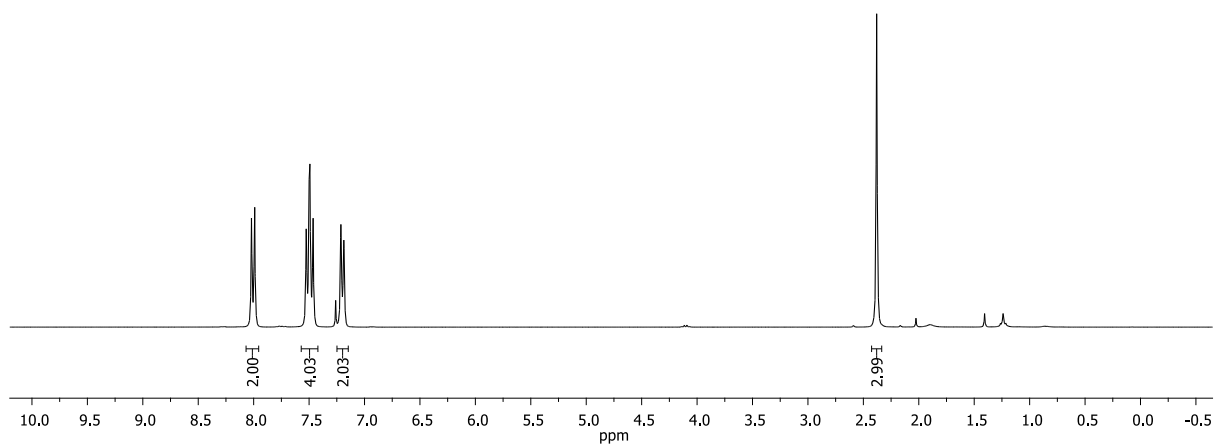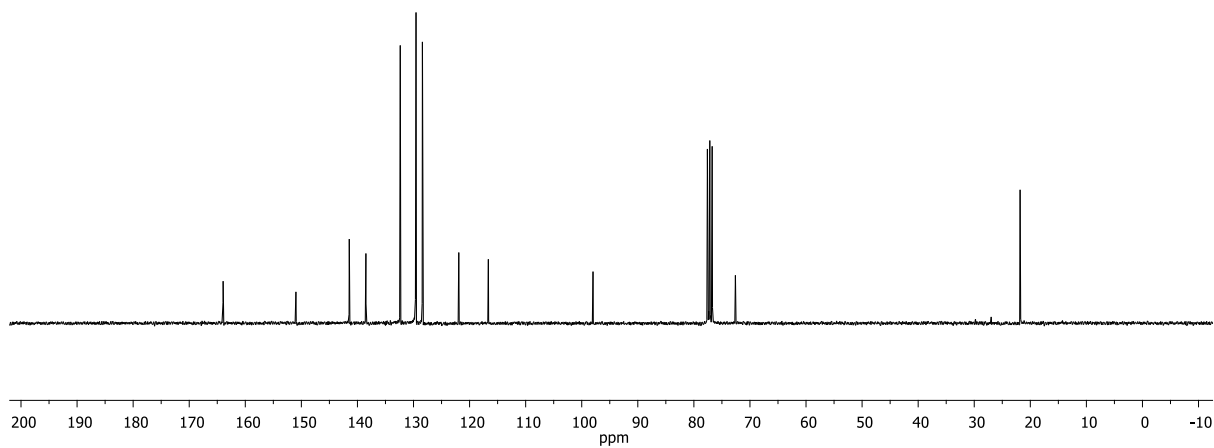

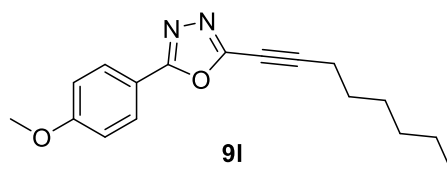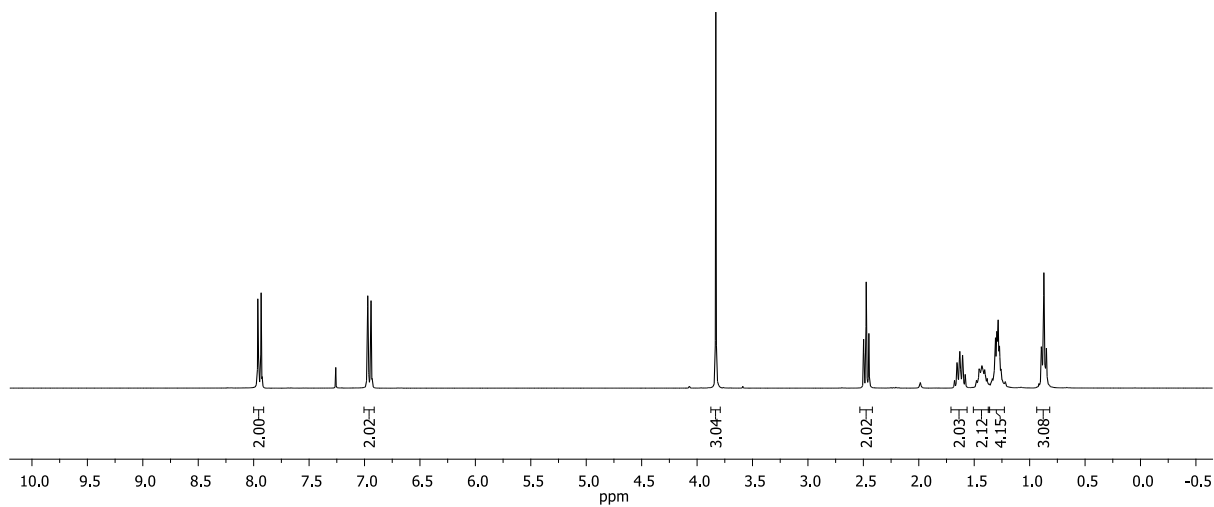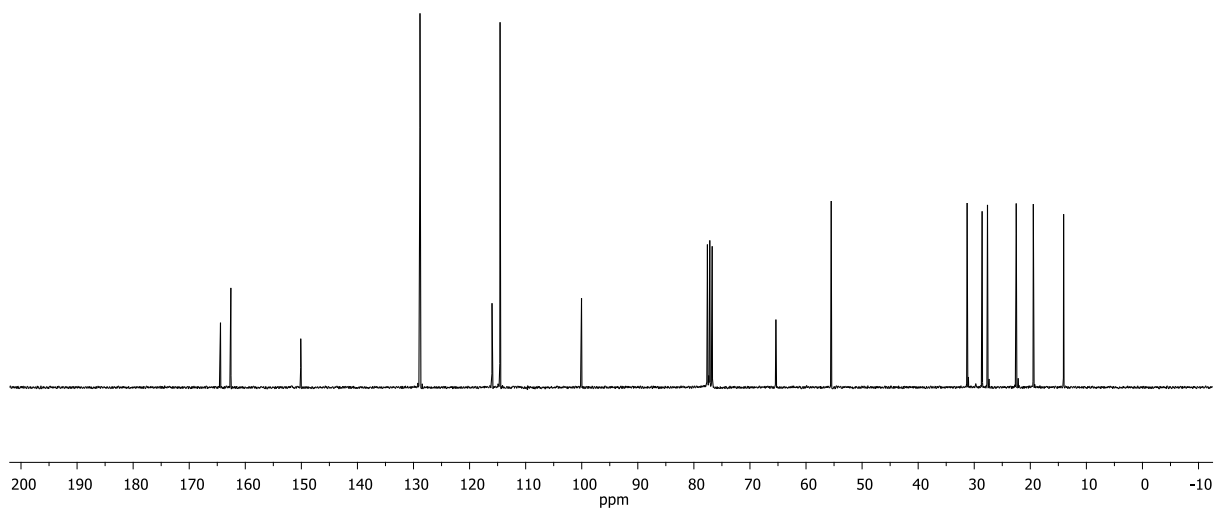

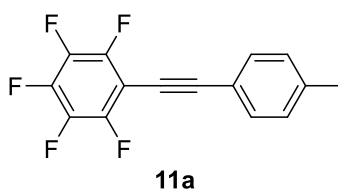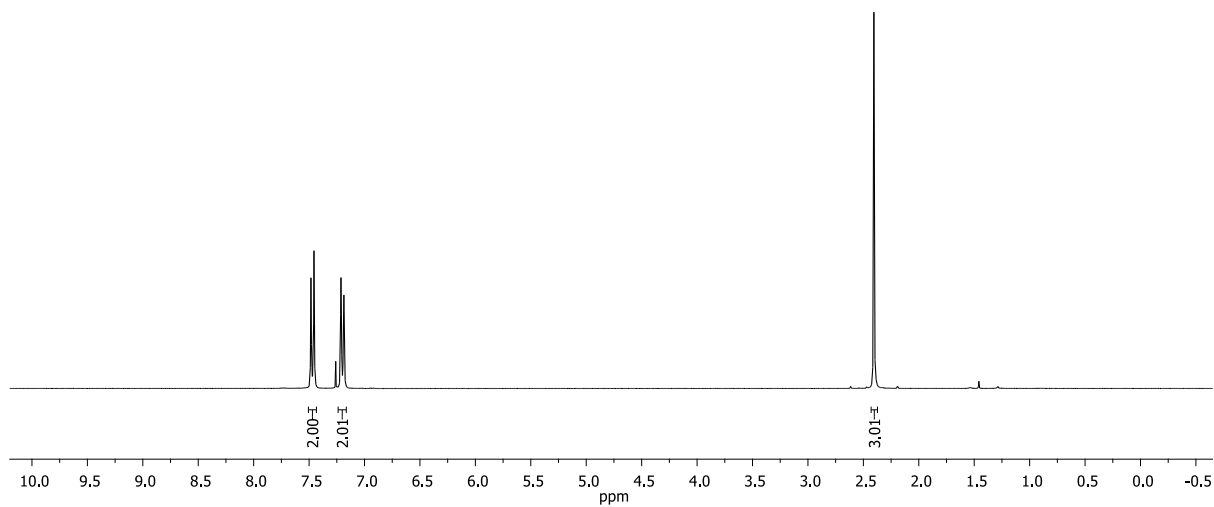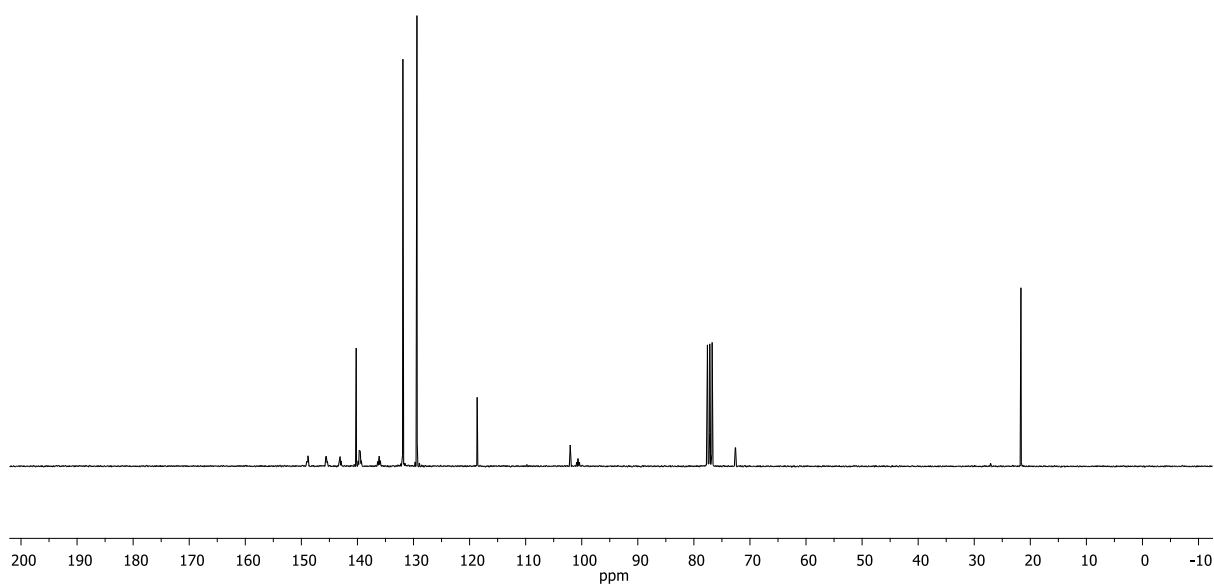

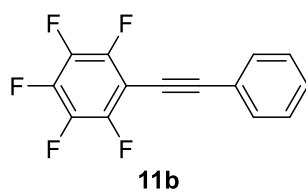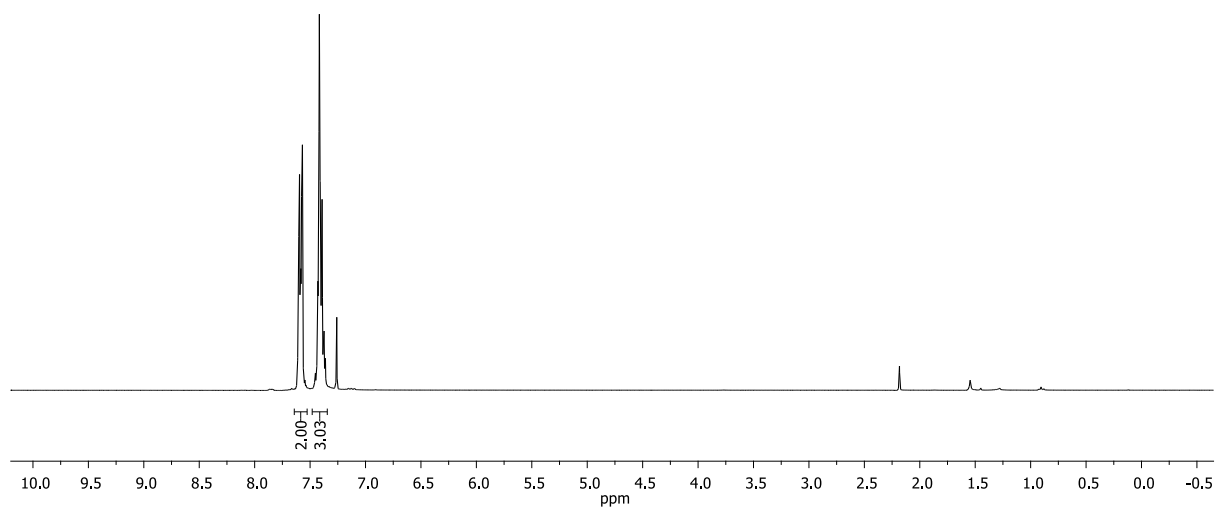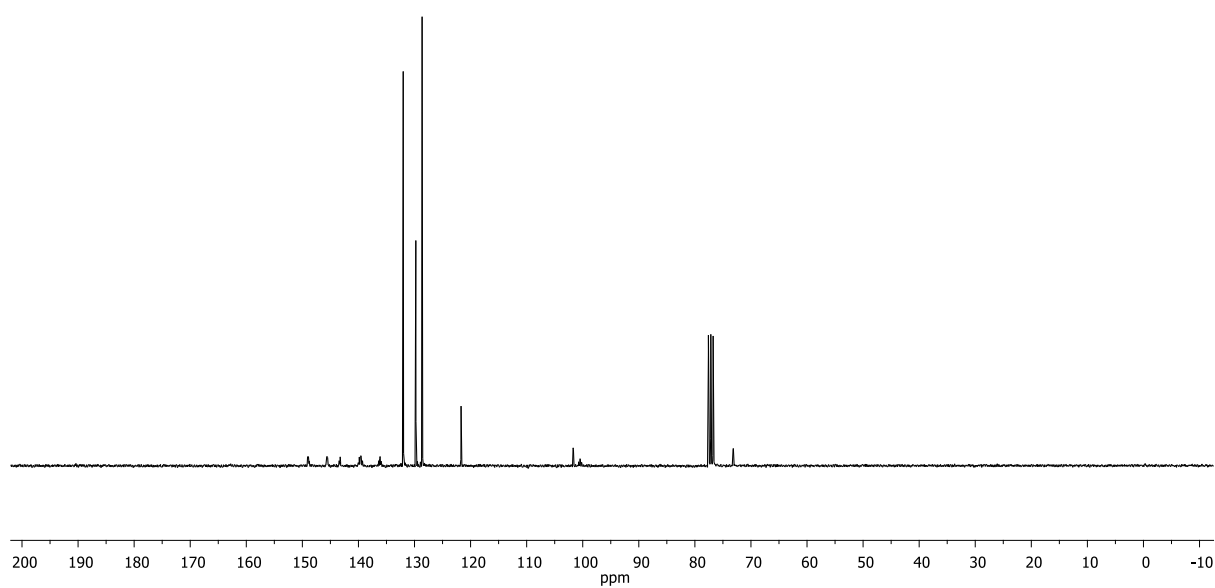

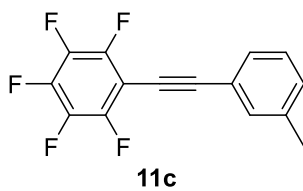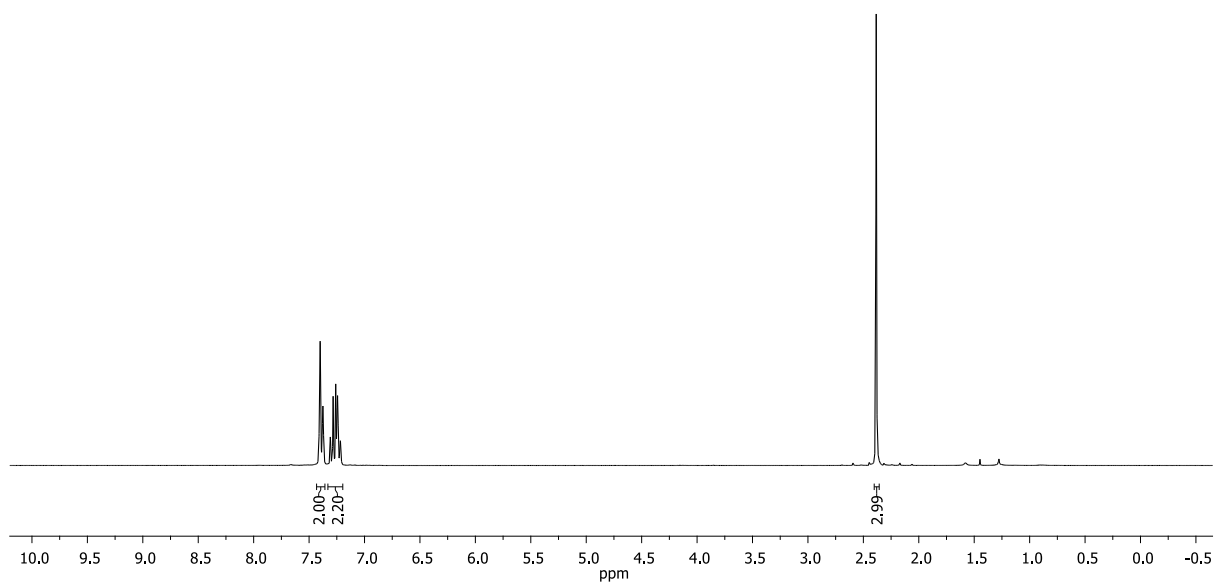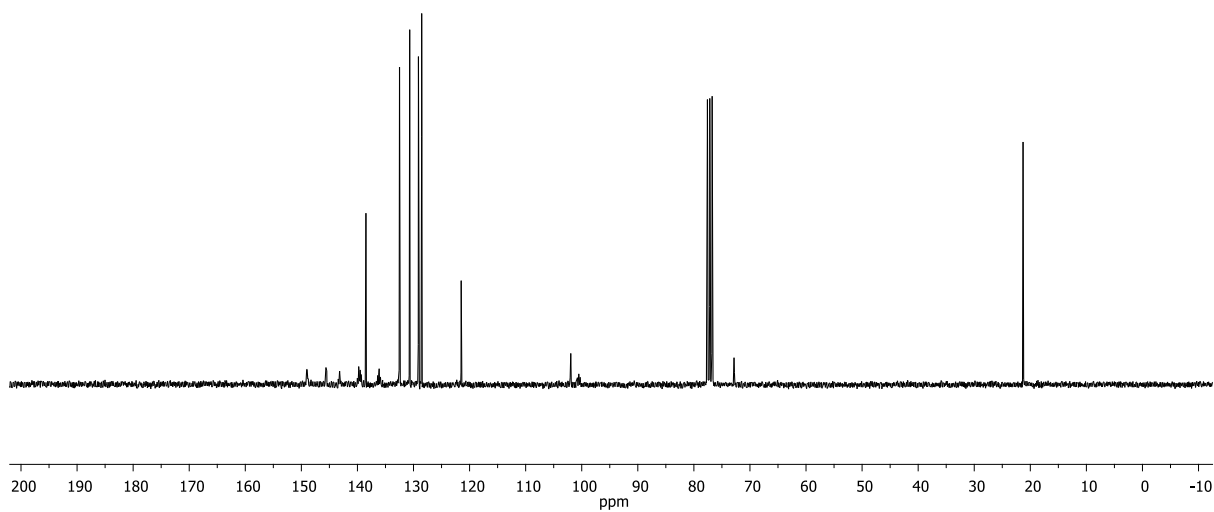

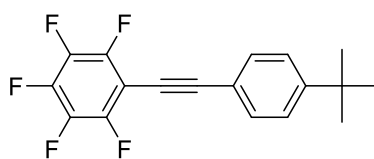

**11d**

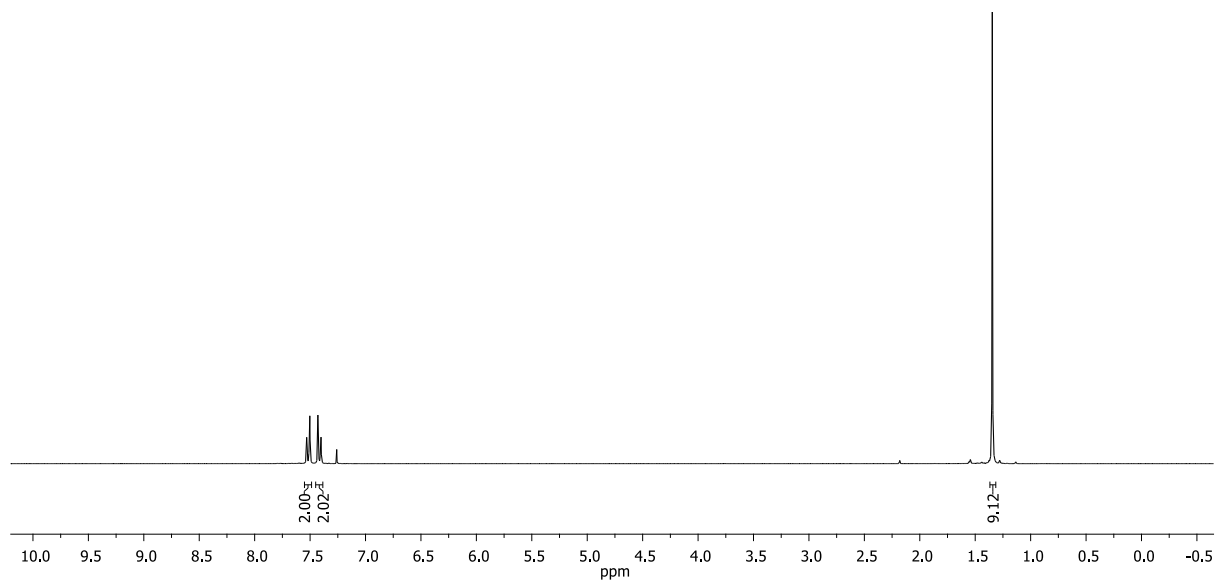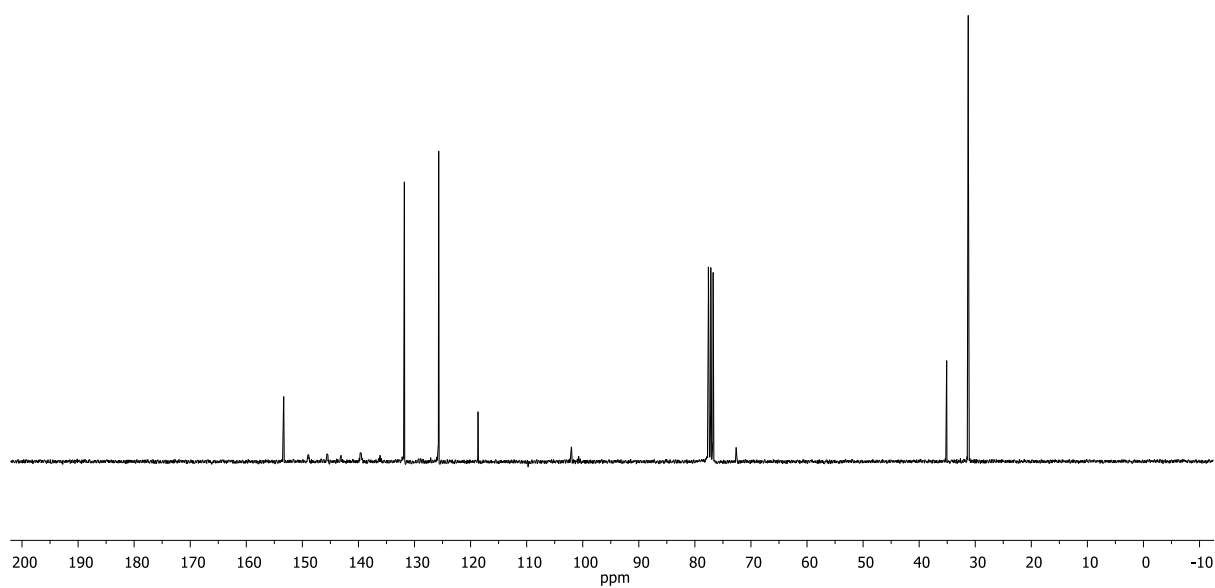

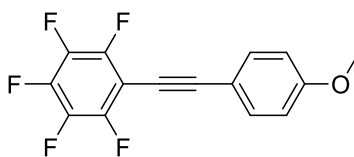

**11e**

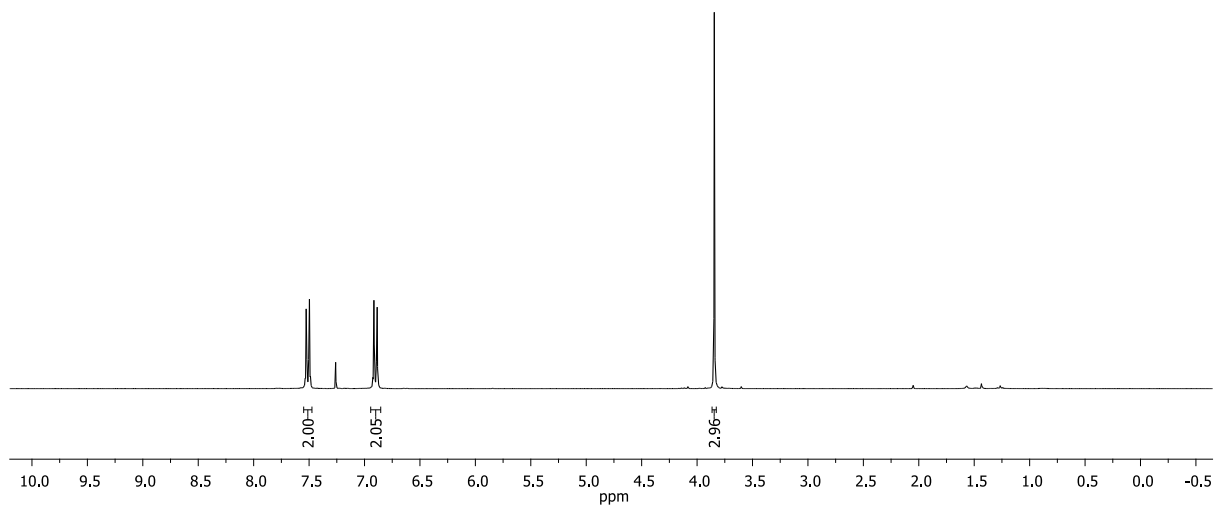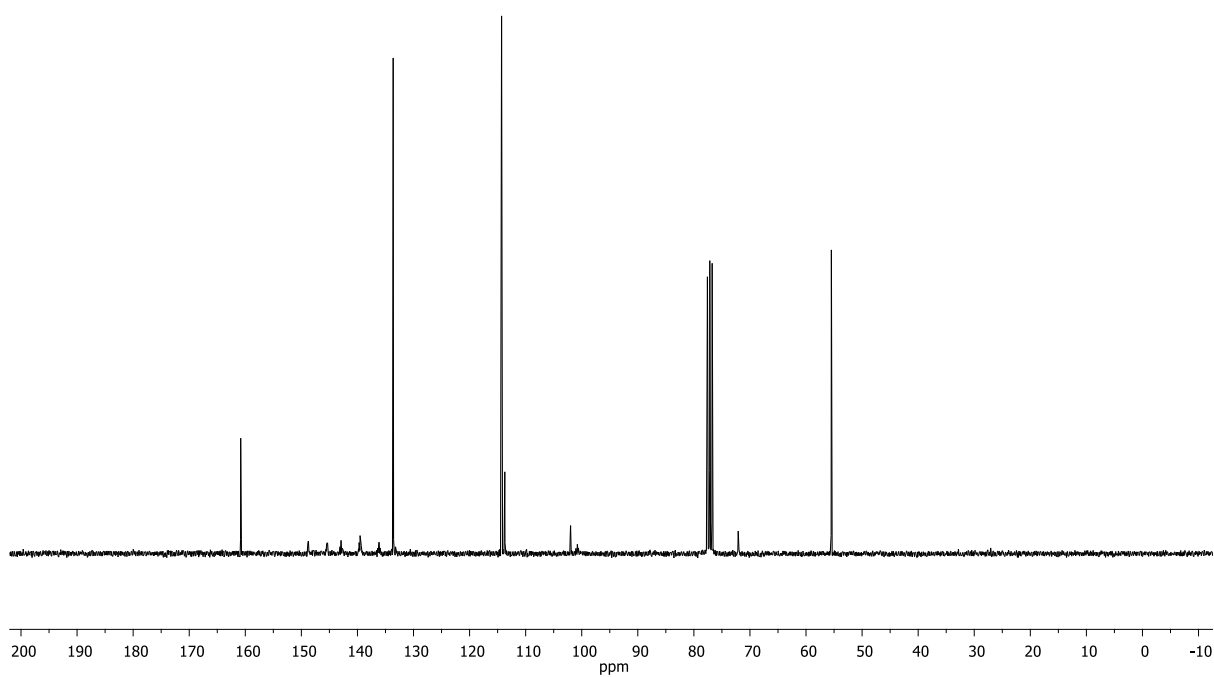

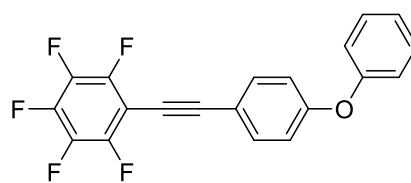

**11f**

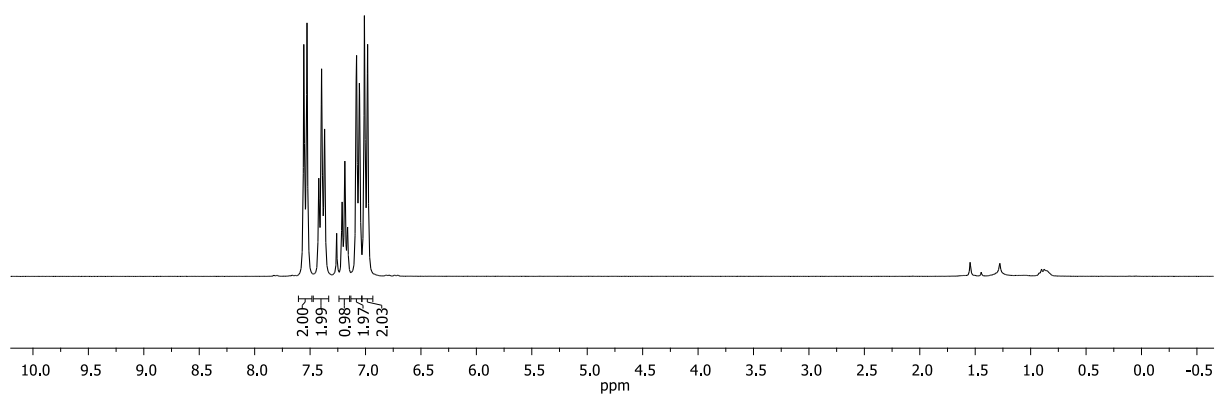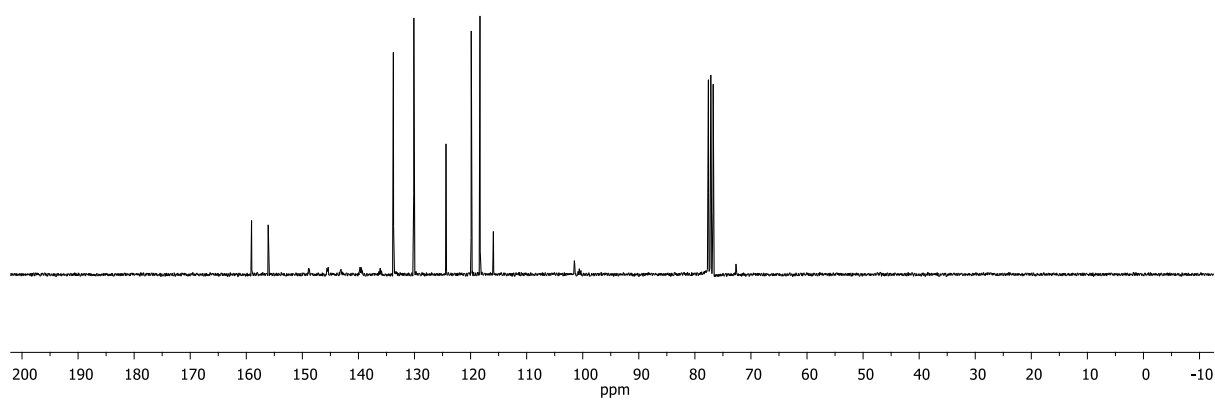

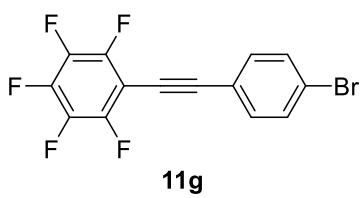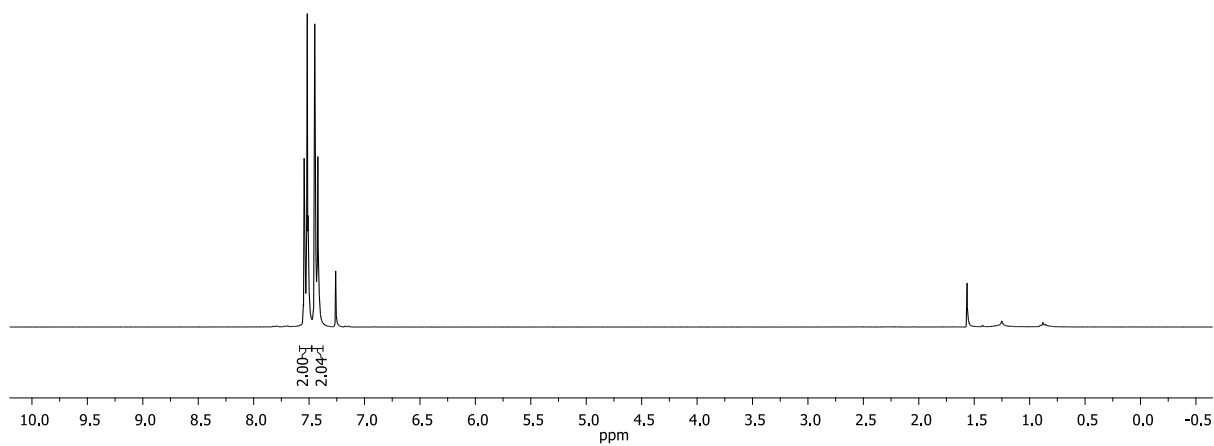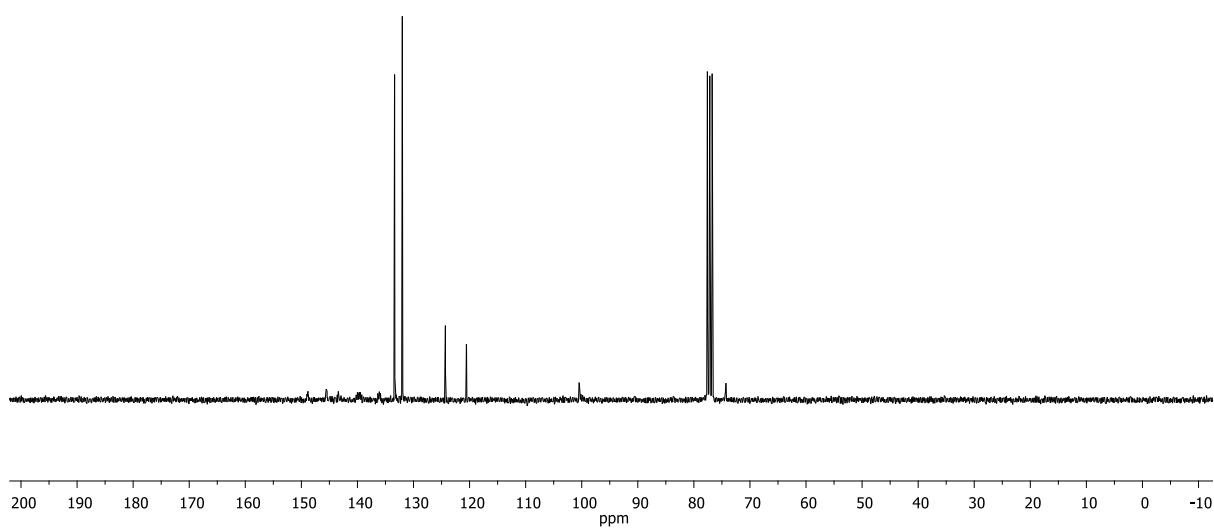

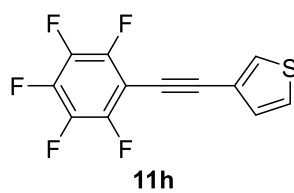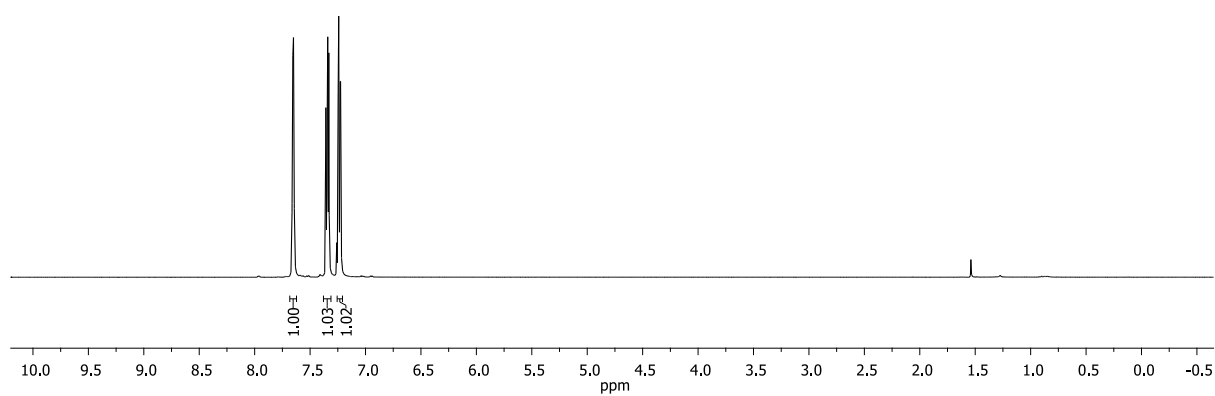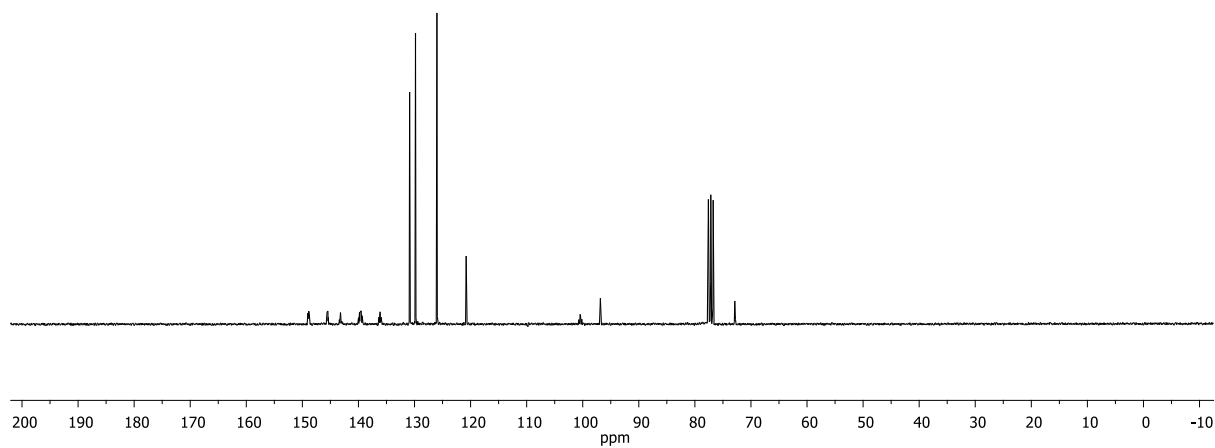

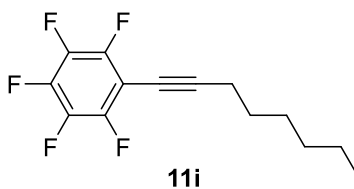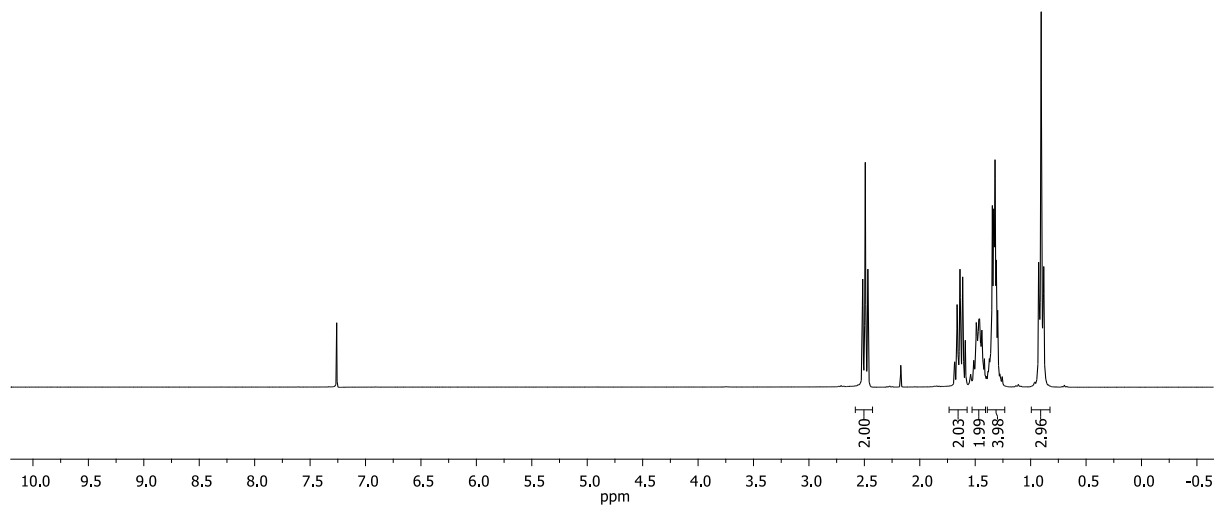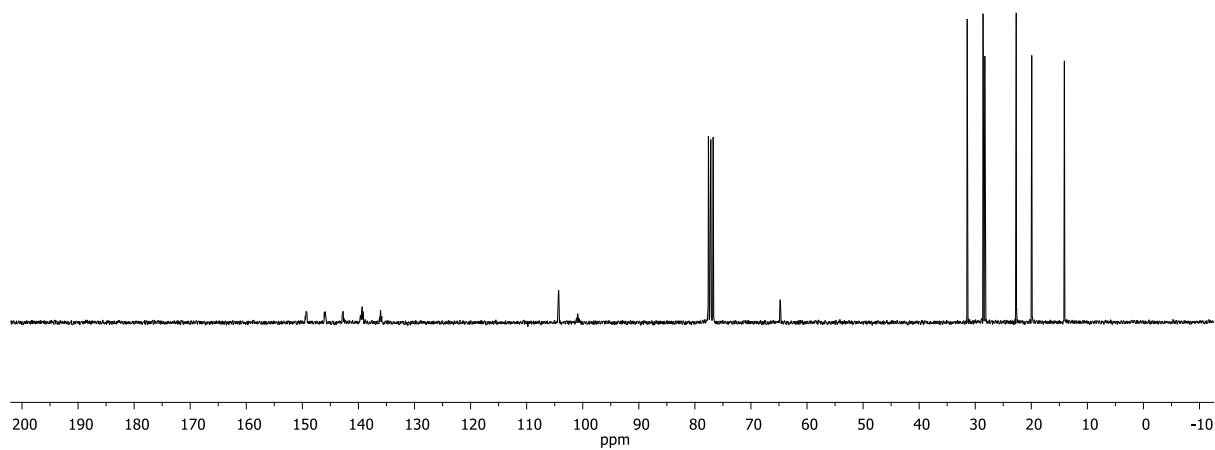

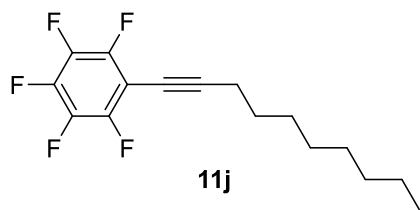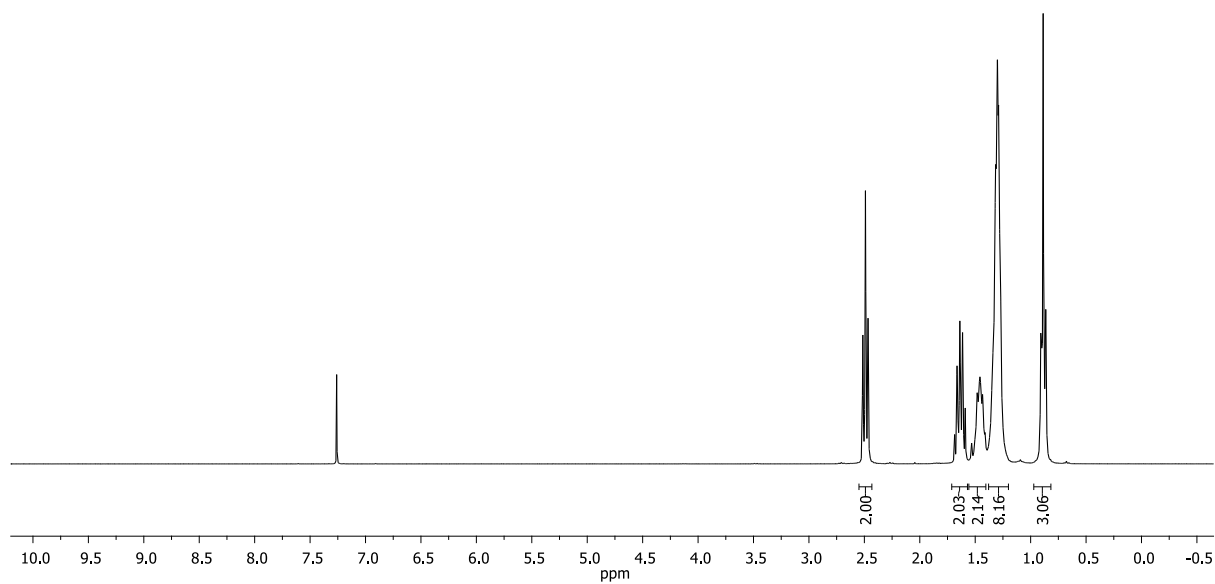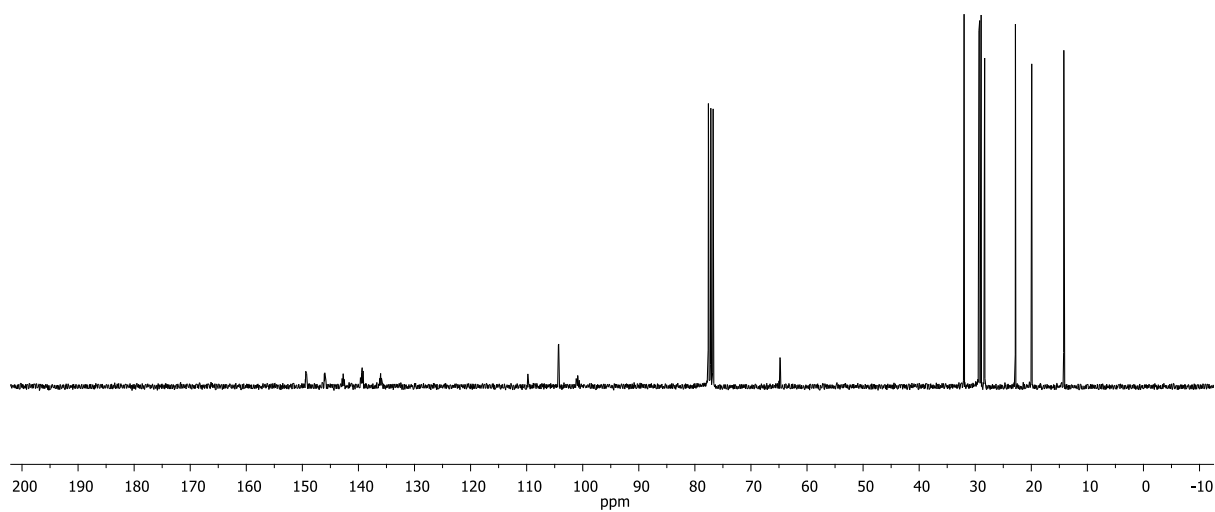

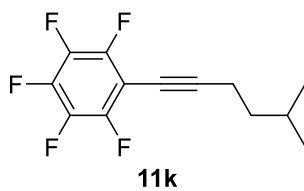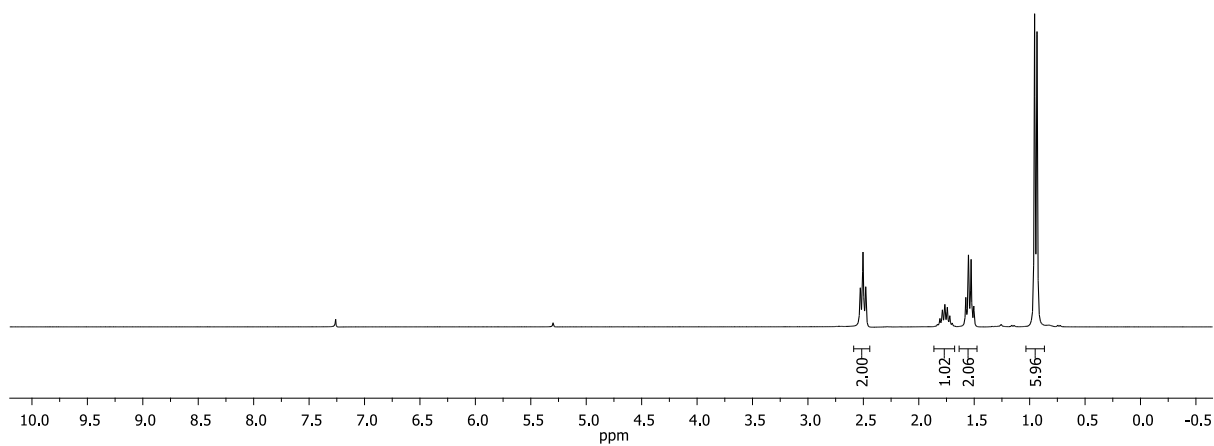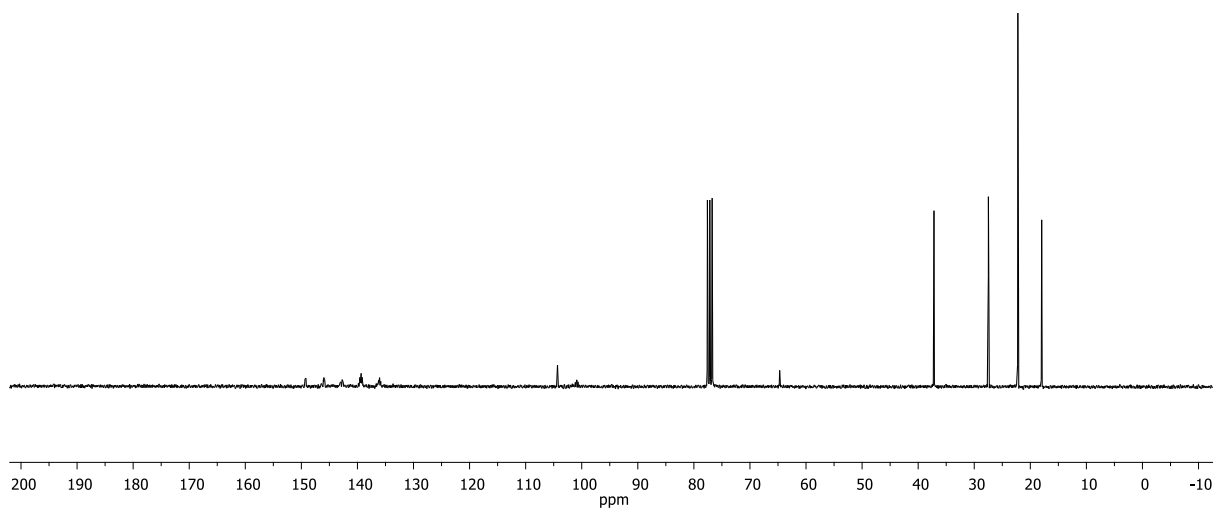

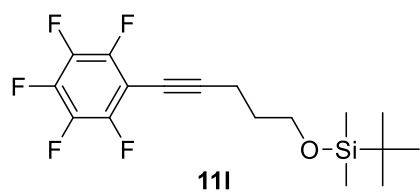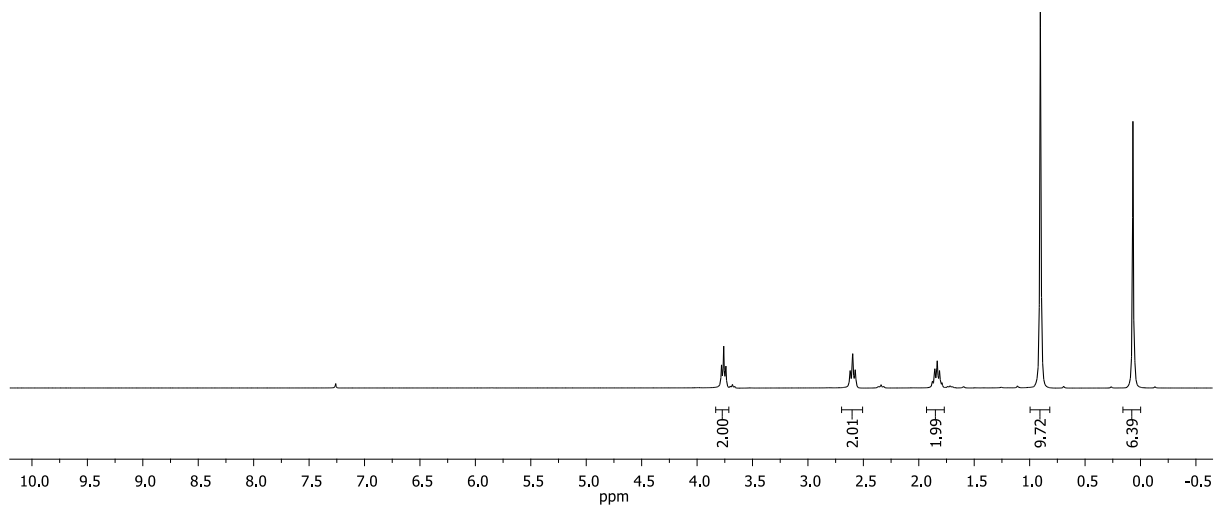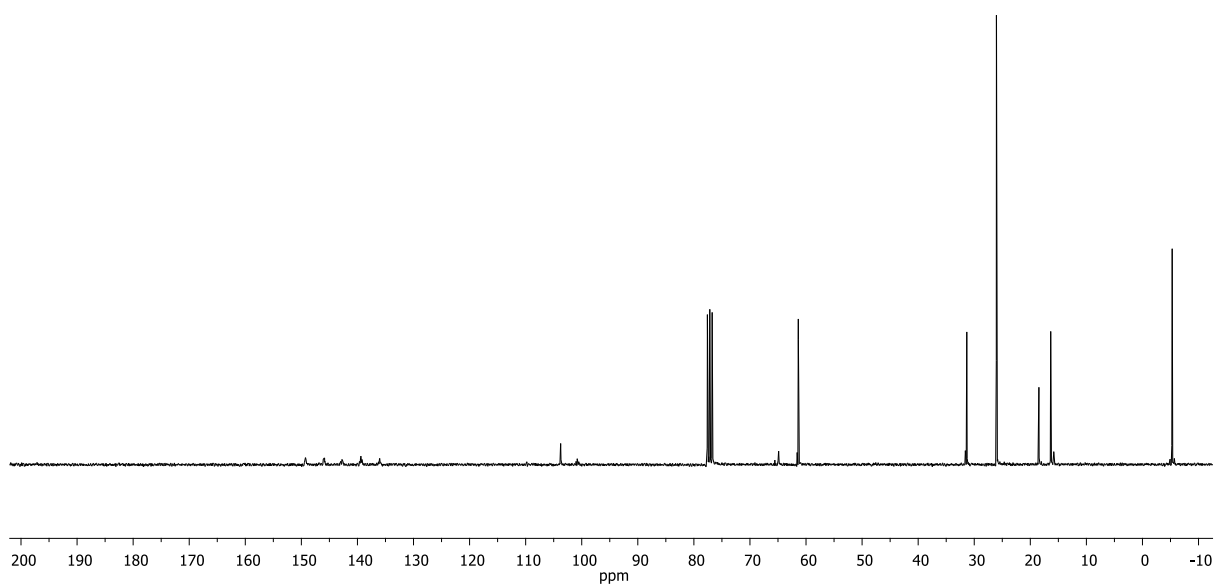

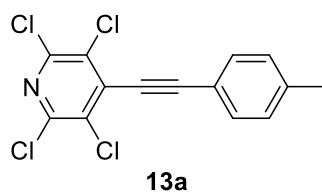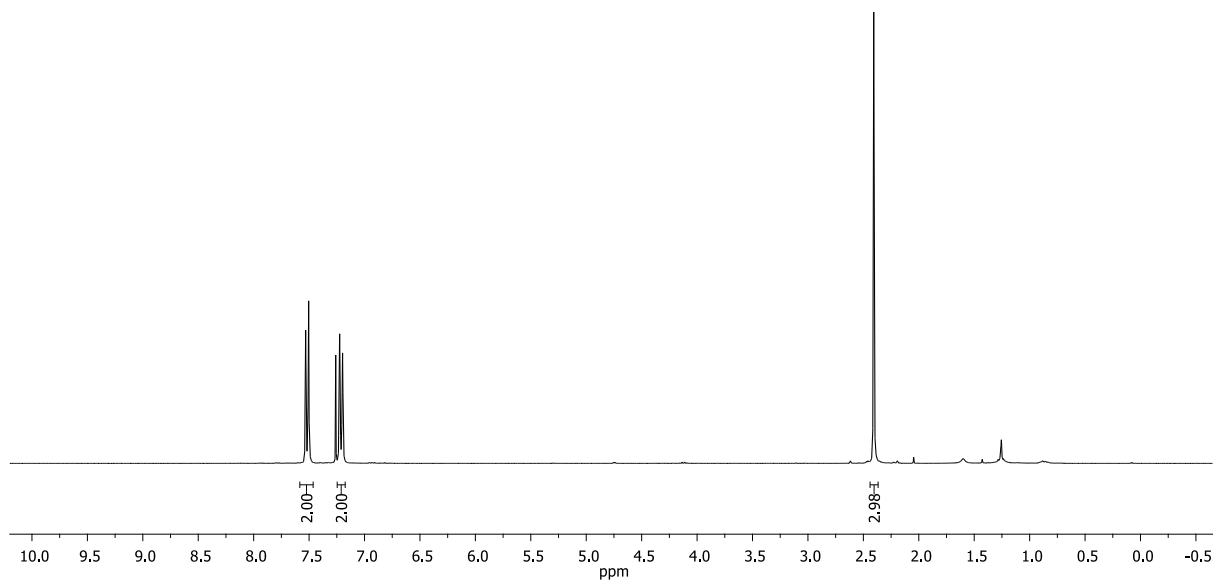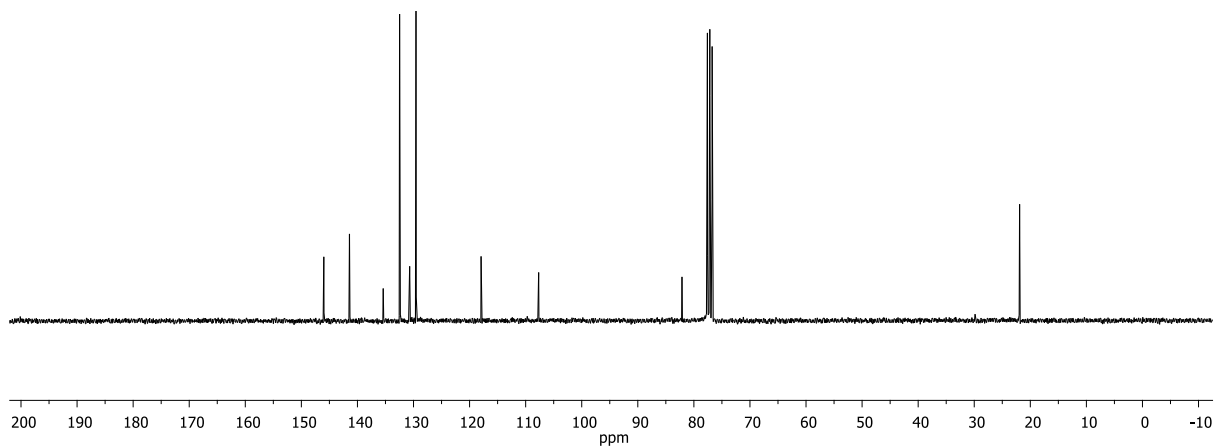

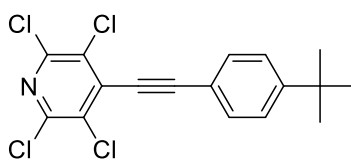

**13b**

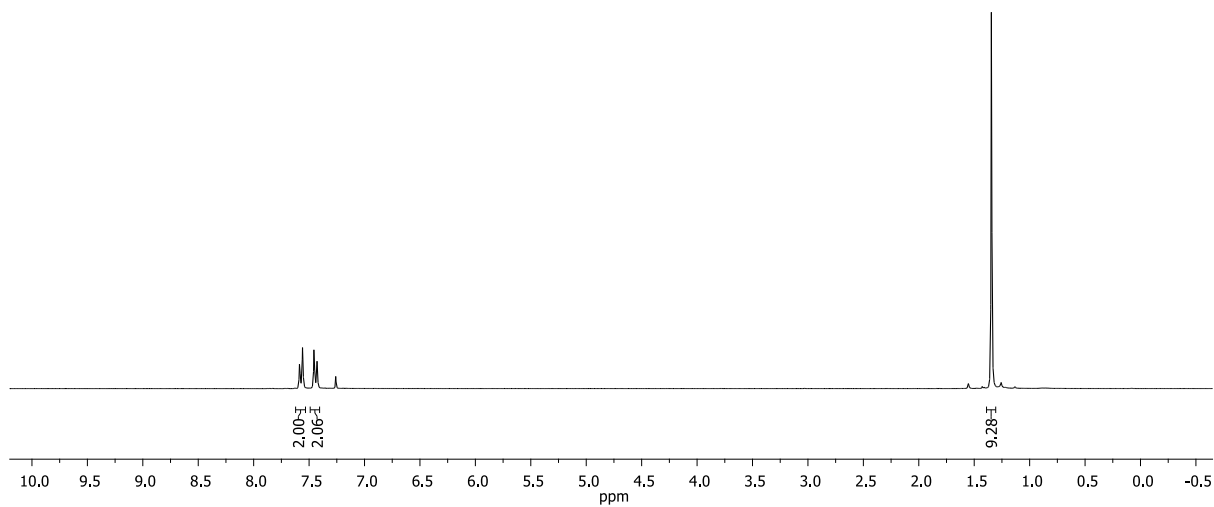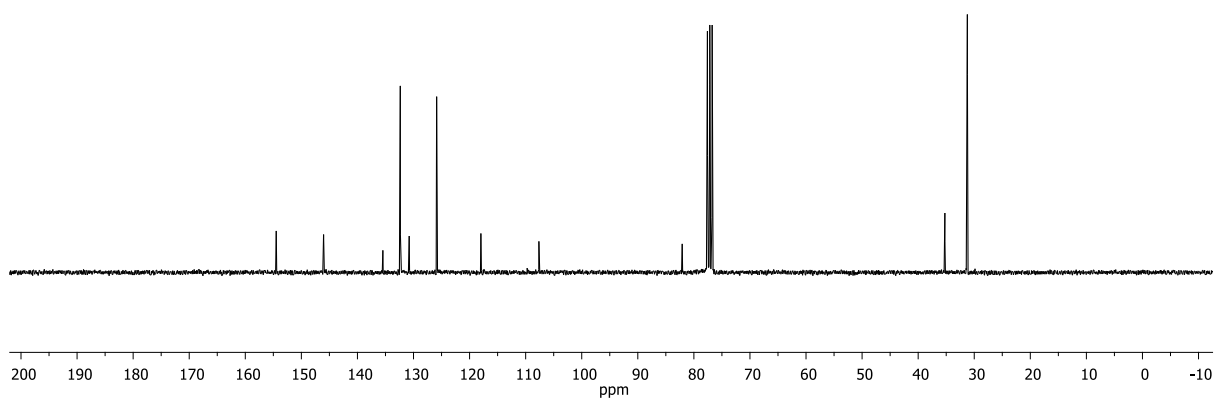

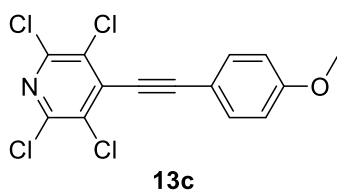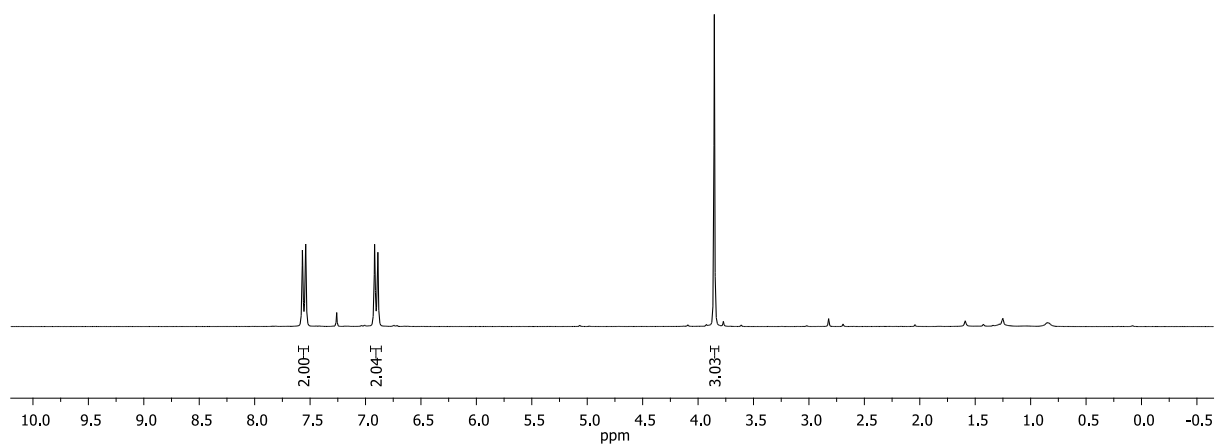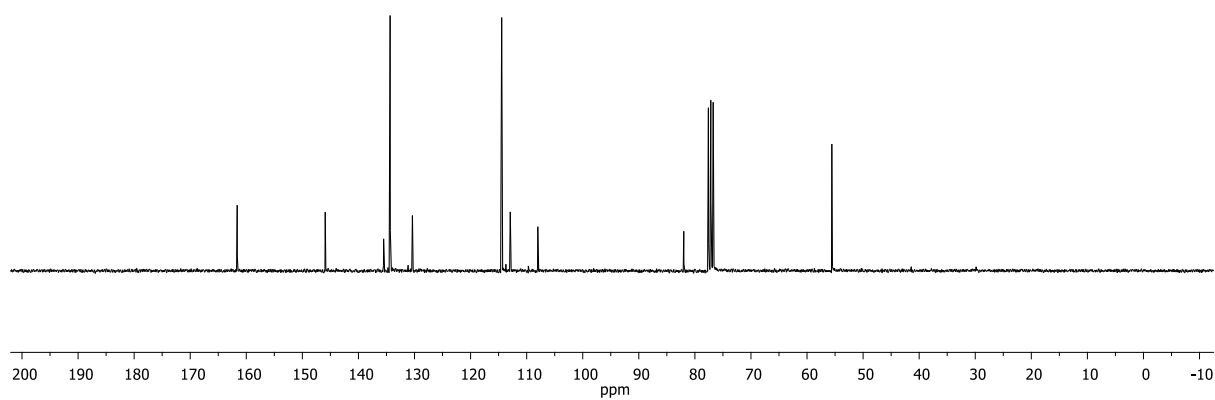

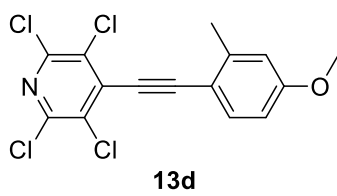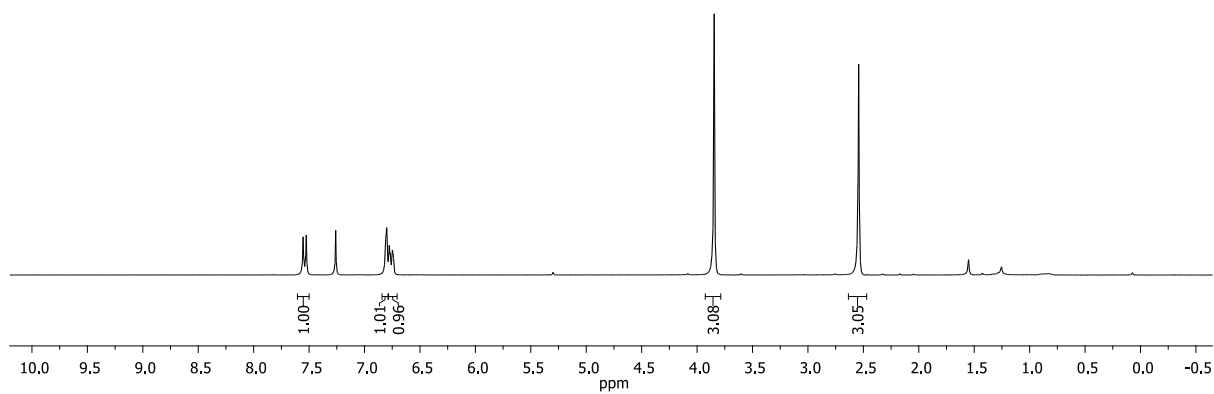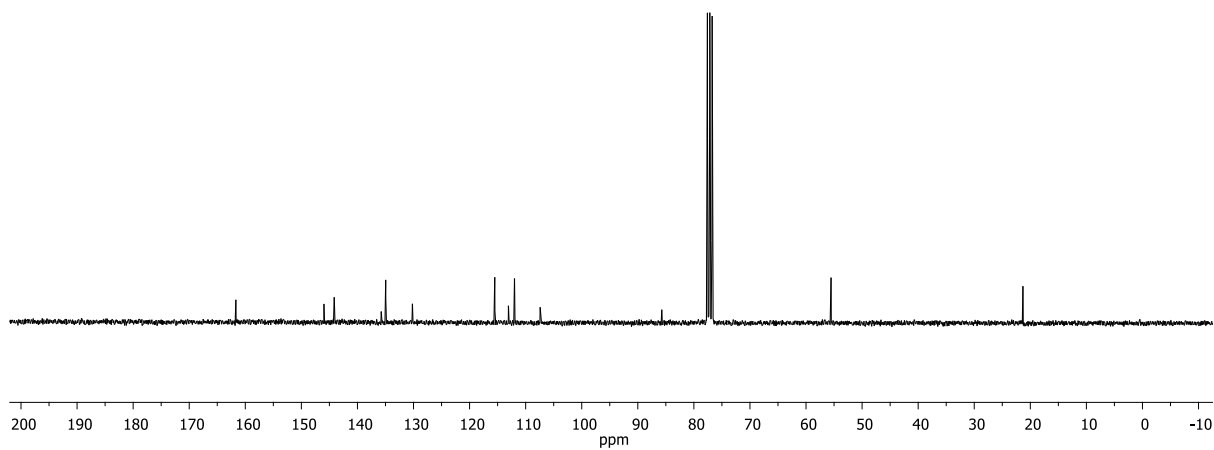

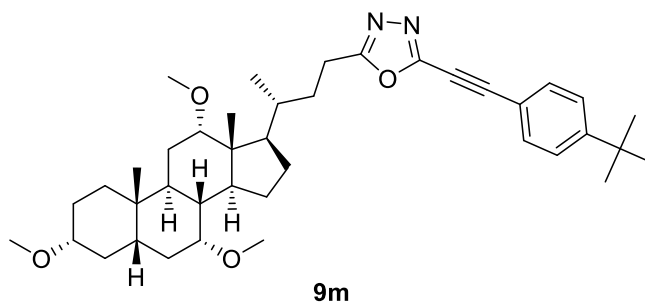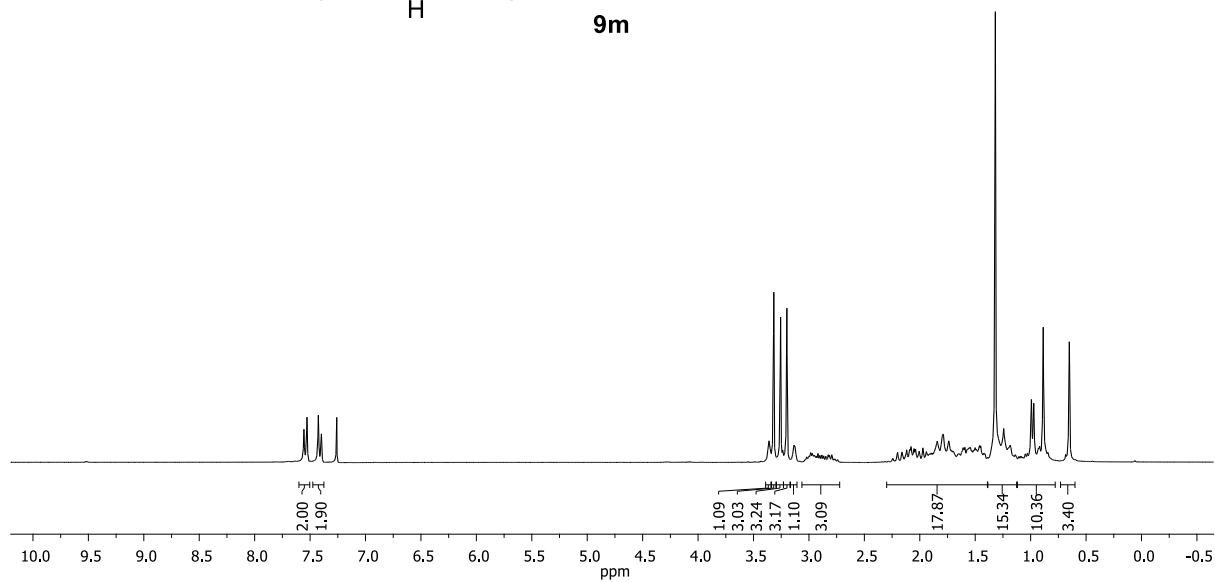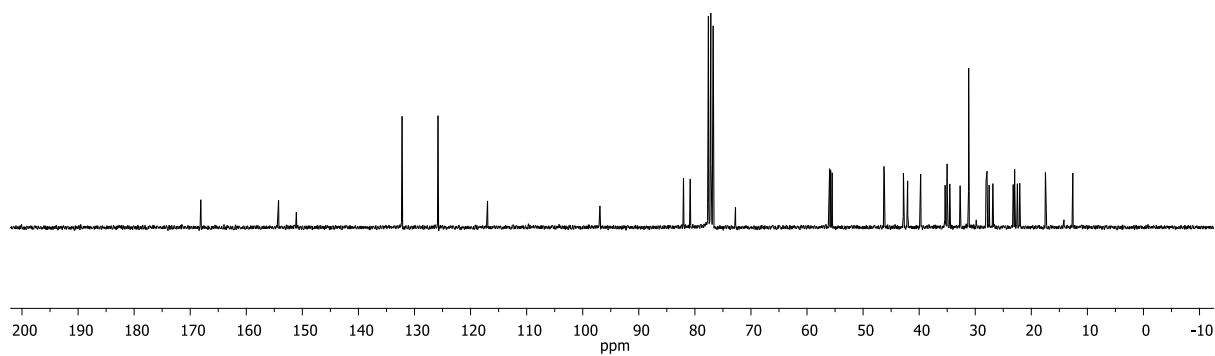

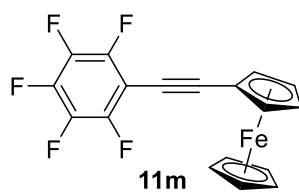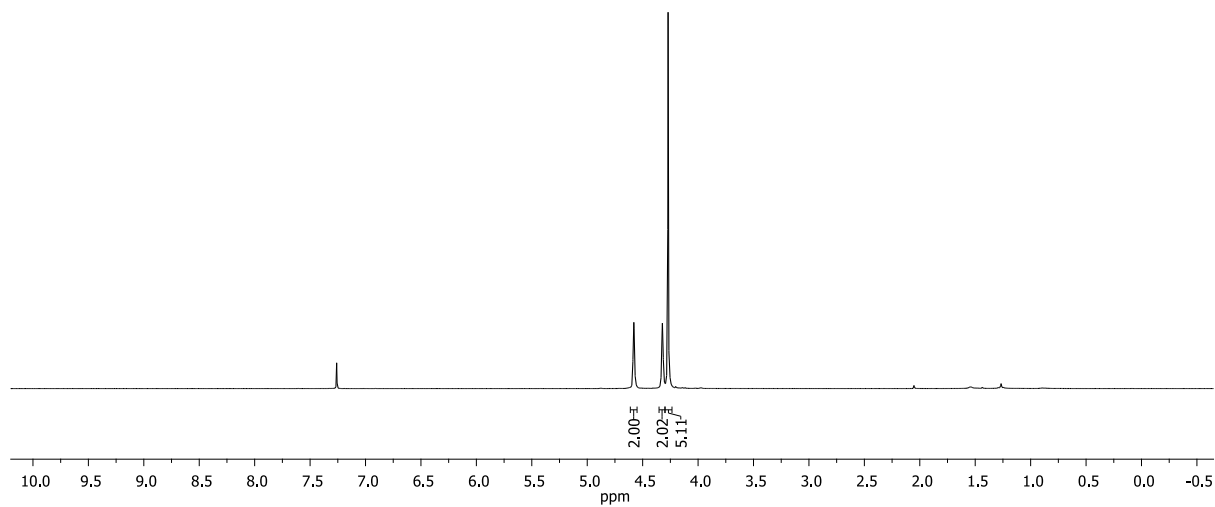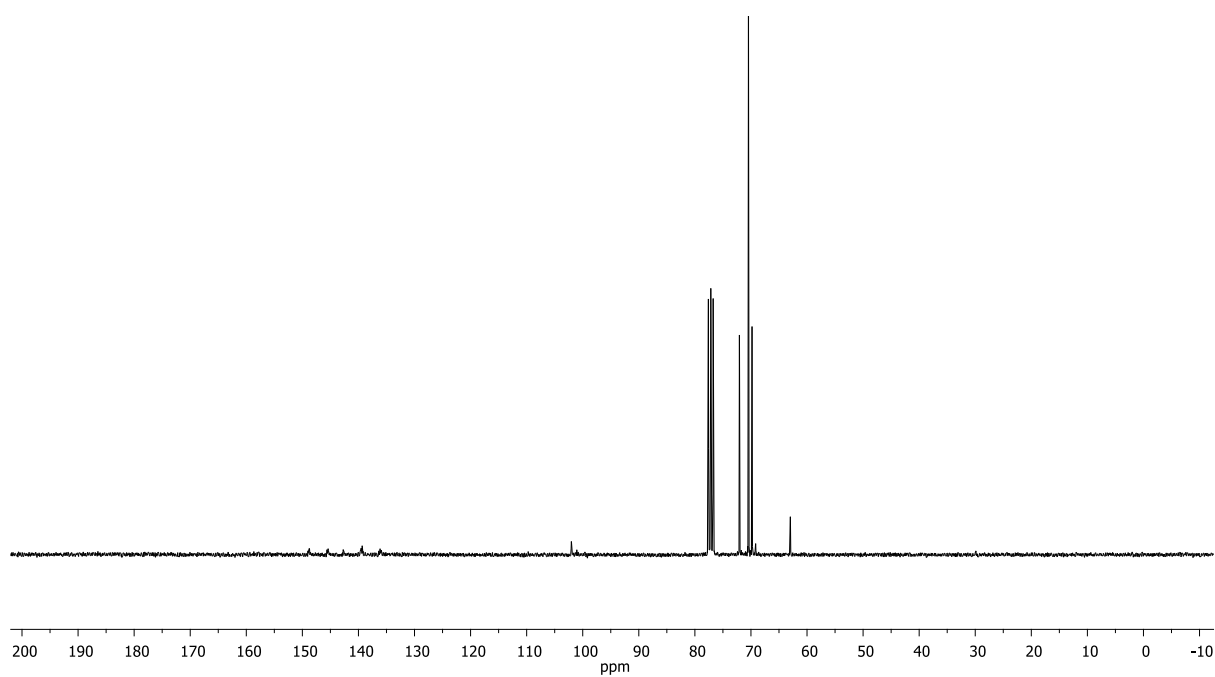

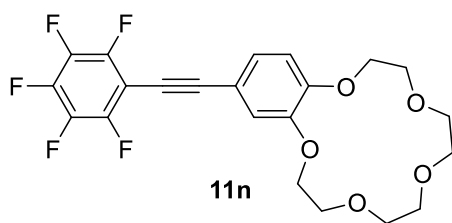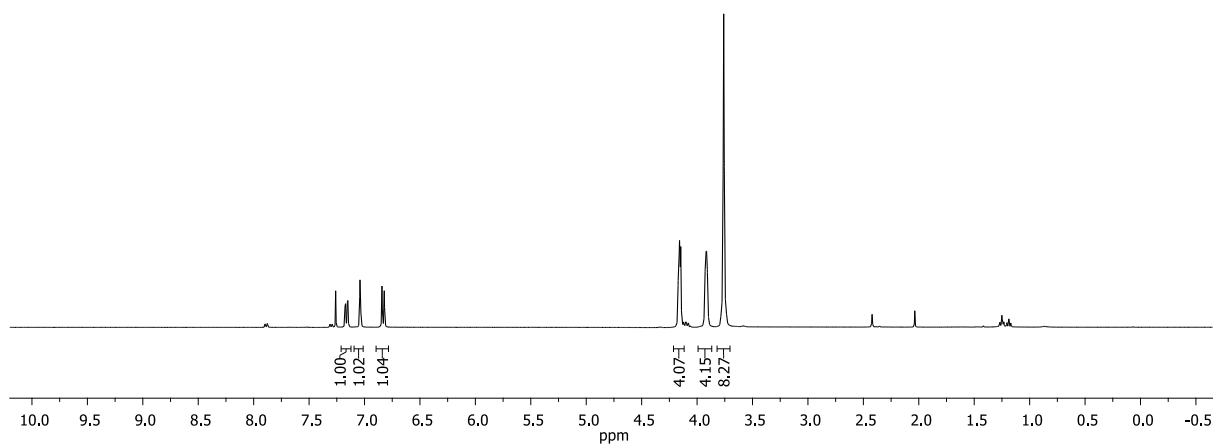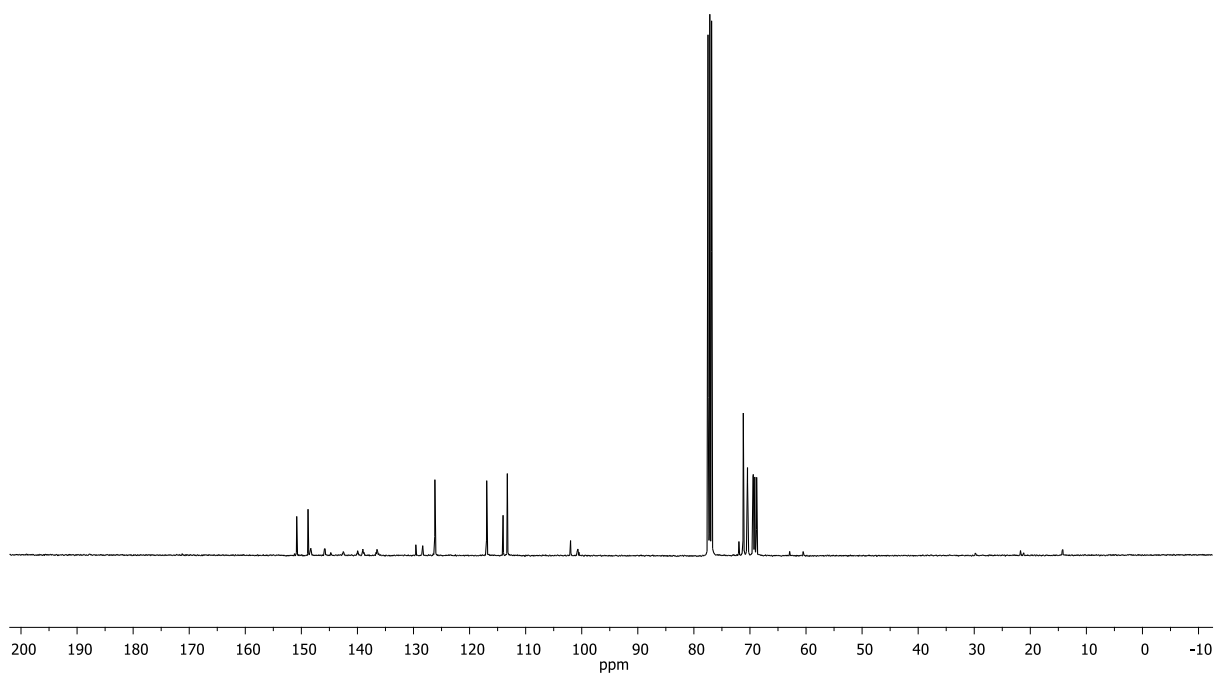

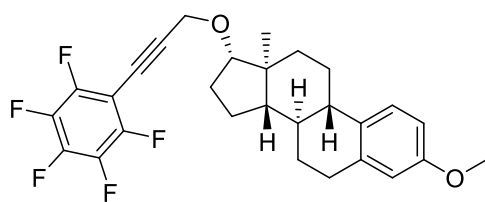

**11o**

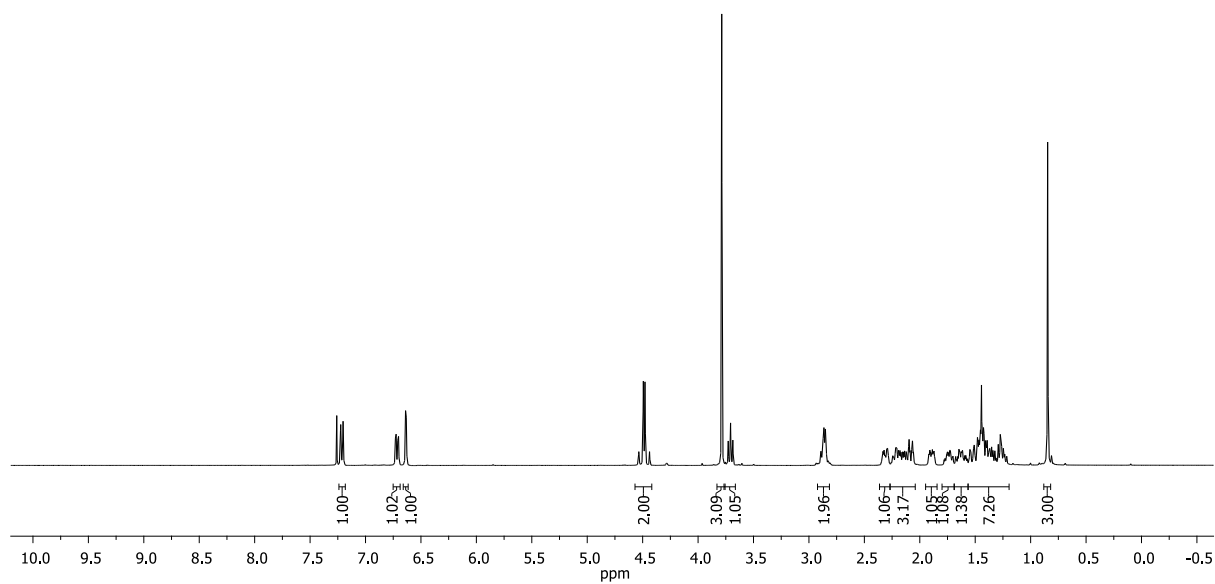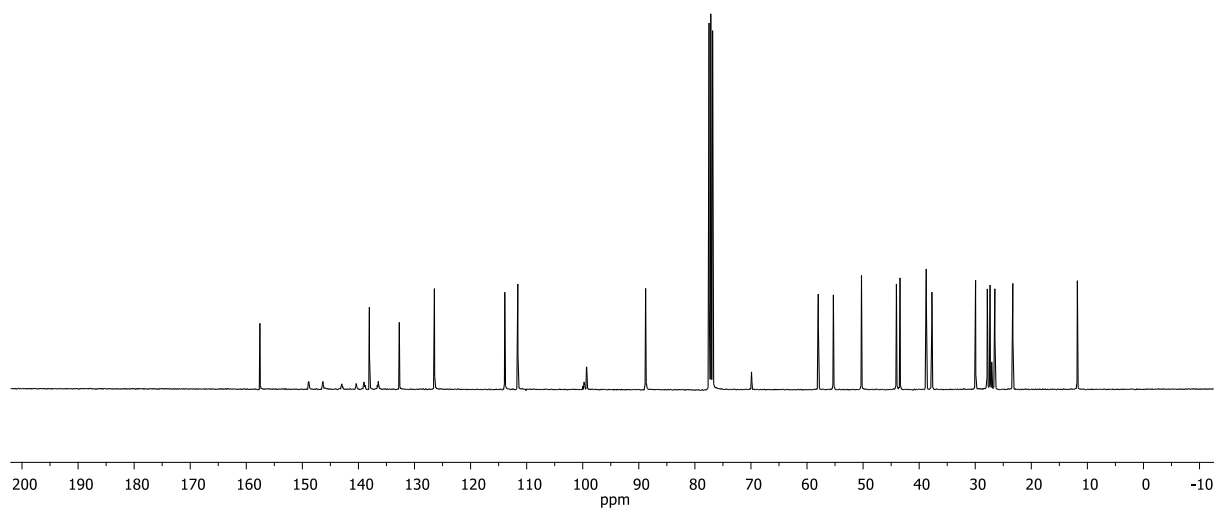

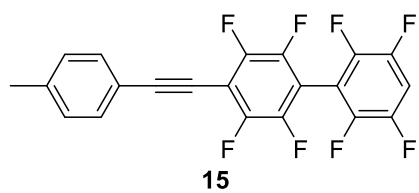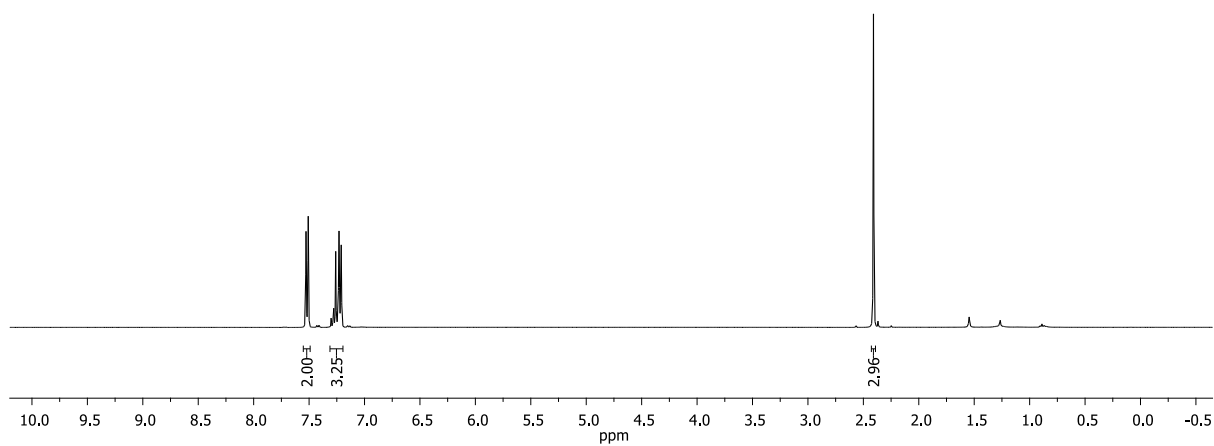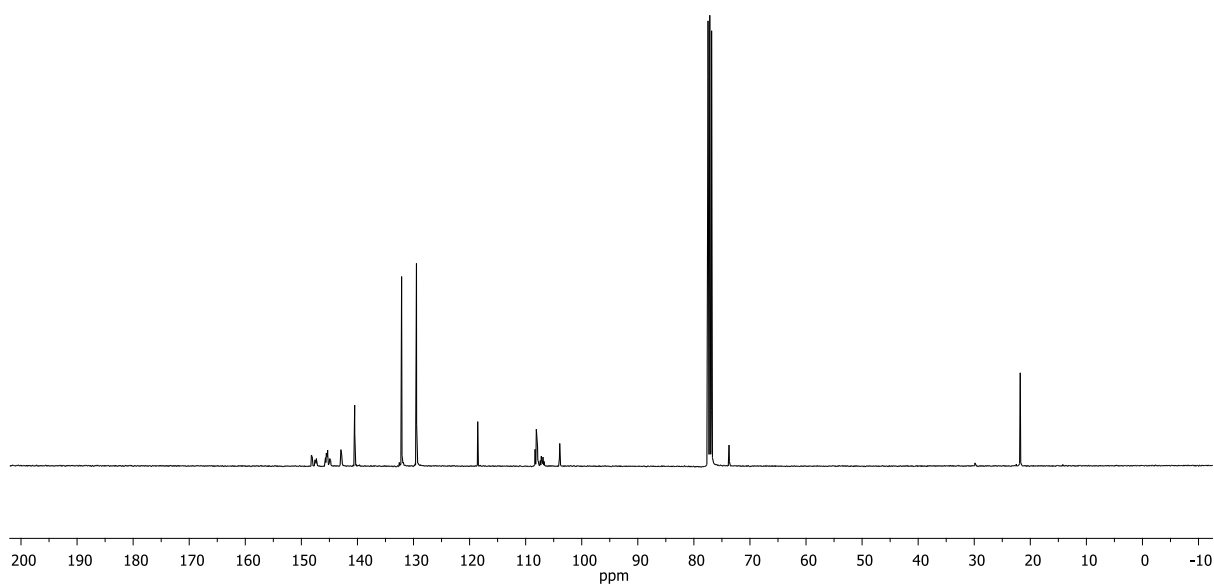

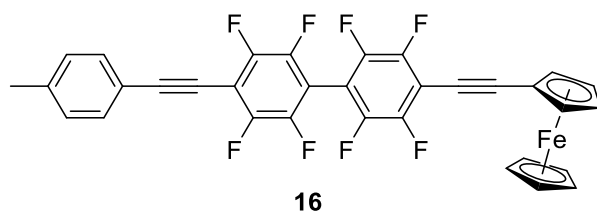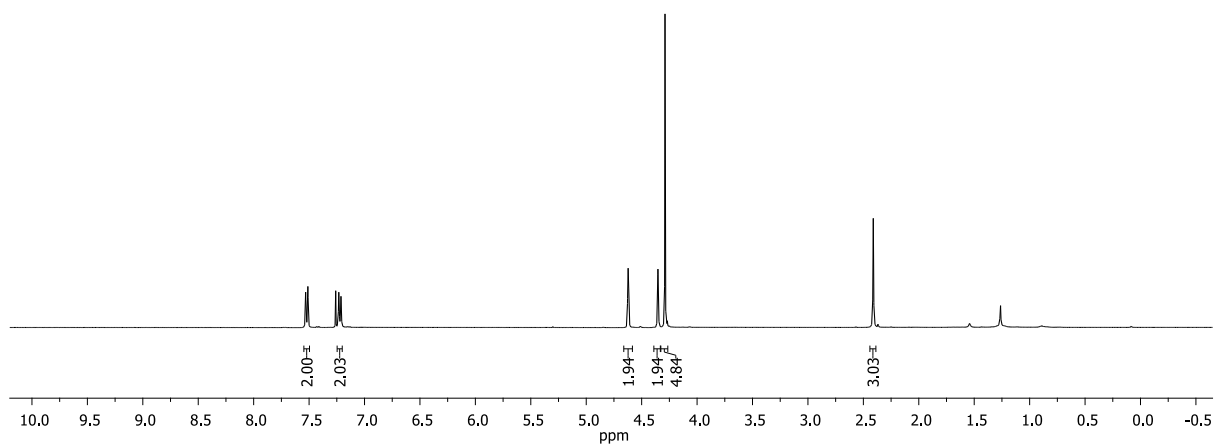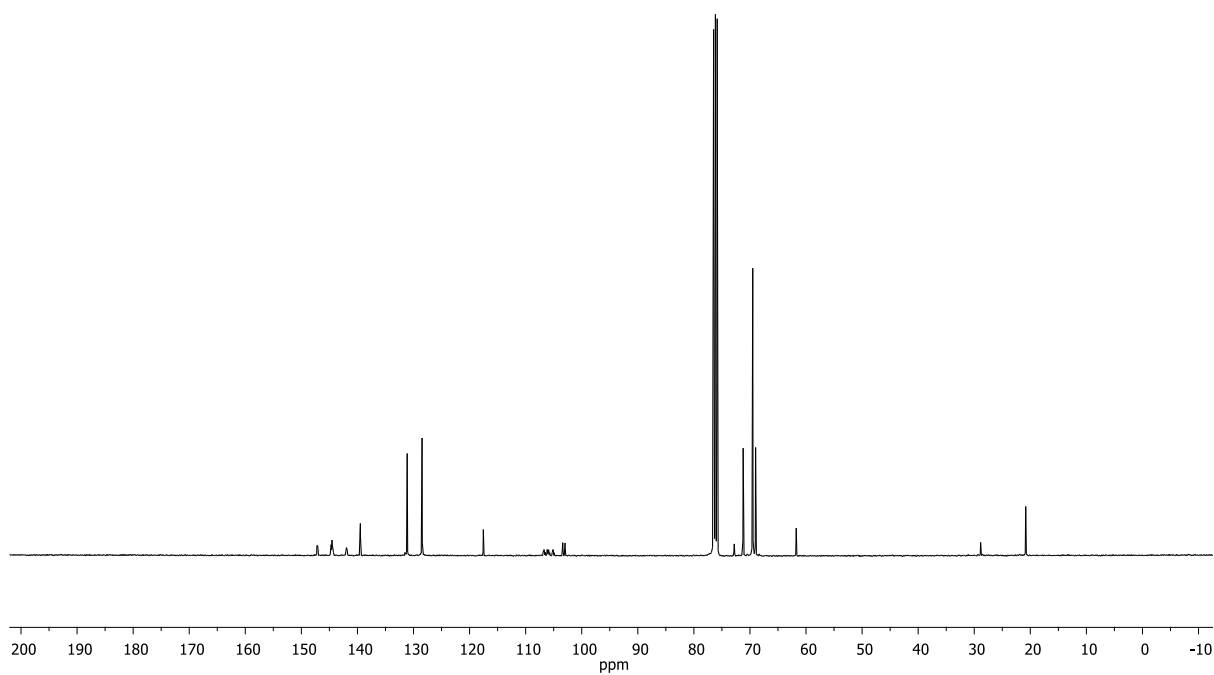

Supplement: Supplementary file 1 [file 3893644]
